# Supplementary material for: Transcriptional and Epigenetic Alterations in the Progression of Non-Alcoholic Fatty Liver Disease and Biomarkers Helping to Diagnose Non-Alcoholic Steatohepatitis
Source: MDPI journal article supplement (doi:10.3390/biomedicines11030970), 2023-03-21
Supplement: s1 [file s1]

# Supplementary

## Figures S1-S3

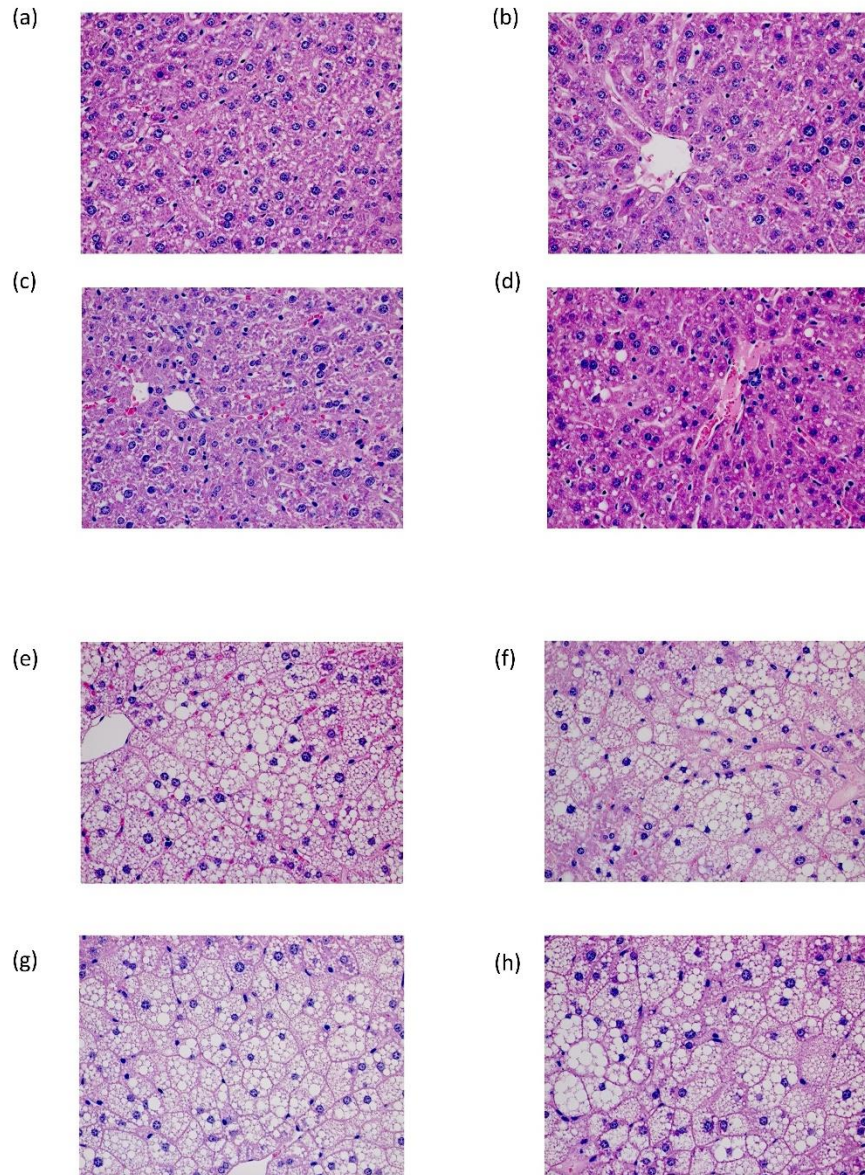

**Figure S1.** Liver histology of the mouse model. (a-d) Liver biopsy of NAFL sample 2-5 with hematoxylin-eosin staining, scale bar 20  $\mu m$  ; (e-h) Liver biopsy of NASH sample 2-5 with hematoxylin-eosin staining, scale bar 20  $\mu m$ .

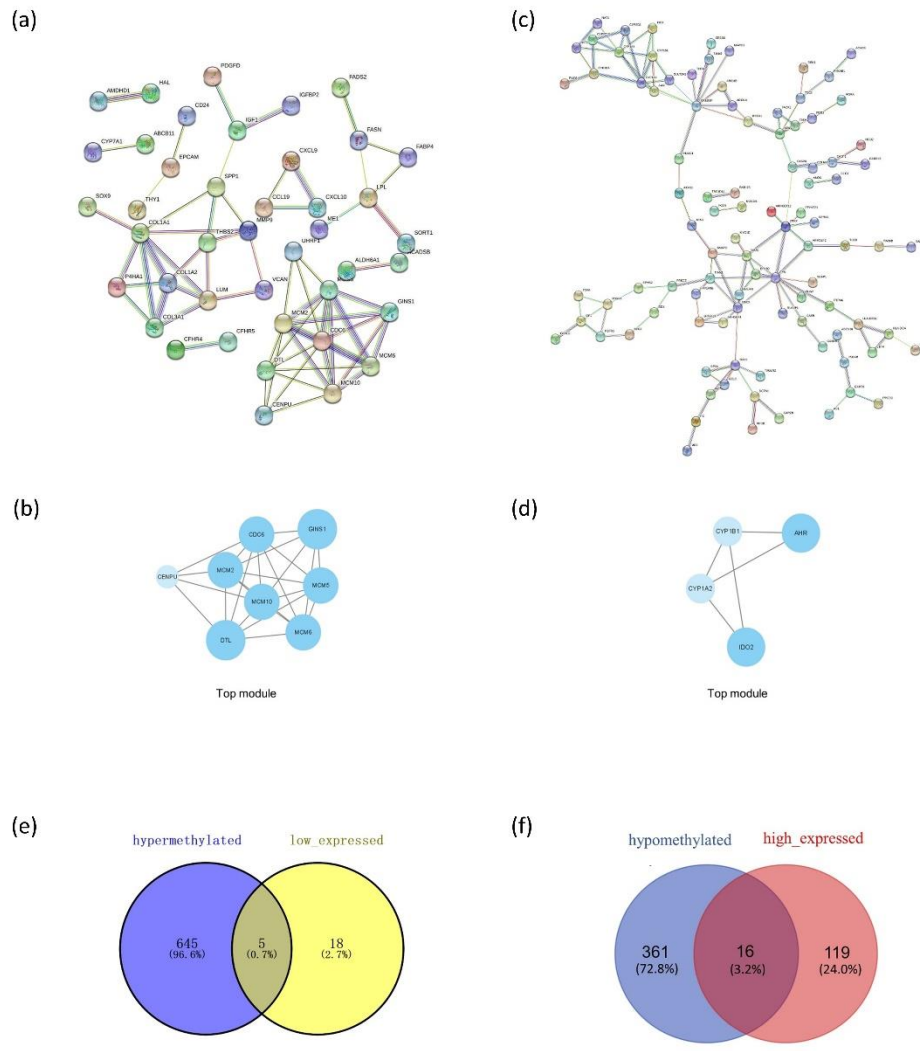

**Figure S2.** The network of PPI analysis. (a) PPI network of the DEGs in the Normal vs NASH group; (b) Top module of the DEGs in the Normal vs NASH group; (c) PPI network of the DMGs in the Normal vs NASH group; (d) Top module of the DMGs in the Normal vs NASH group; (e) Identification of hypermethylated and low expressed genes; (f) Identification of hypomethylated and high expressed genes.

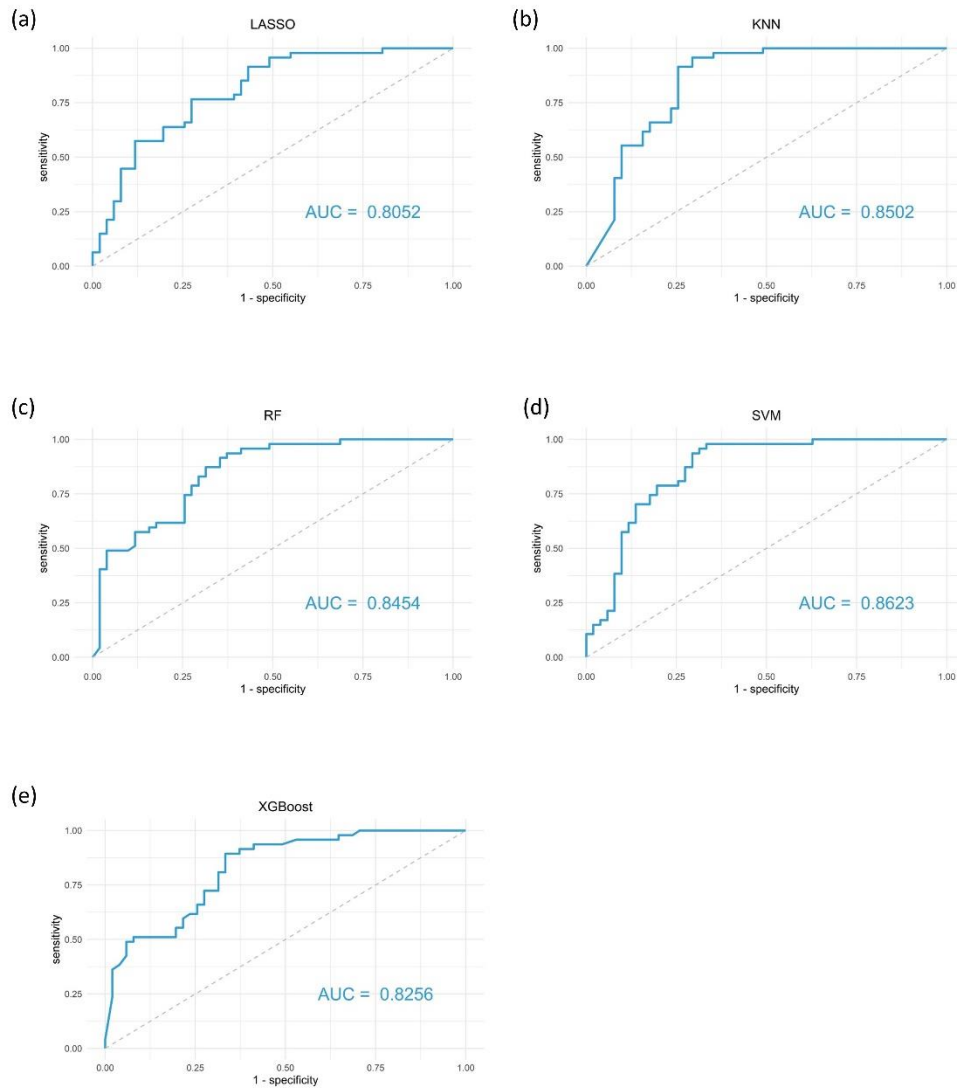

**Figure S3.** Receiver operating characteristic curves of different diagnostic models. (a) Receiver operating characteristic curve of the LASSO model; (b) Receiver operating characteristic curve of the KNN model; (c) Receiver operating characteristic curve of the RF model; (d) Receiver operating characteristic curve of the SVM model; (e) Receiver operating characteristic curve of the XGBoost model.
