# Supplementary material for: Transcriptional and Epigenetic Alterations in the Progression of Non-Alcoholic Fatty Liver Disease and Biomarkers Helping to Diagnose Non-Alcoholic Steatohepatitis
Source: MDPI journal article supplement (doi:10.3390/biomedicines11030970), 2023-03-21

## 动物实验伦理审查同意书

Approval of Animal Ethical and Welfare

张禾

经四川大学华西医院实验动物伦理委员会初审和复审审查后，您申报的课题  
探索非酒精性脂肪肝模型鼠肝脏组织特定基因的表达模式

符合国家实验动物福利伦理的相关规定，给予通过。

伦理备案号：20220301147

Dear \_\_\_\_\_

Animal Ethics Committee have a meeting as scheduled, the participators have  
evaluated the care and use of animals described in the protocol  
of \_\_\_\_\_

and find the procedures described as appropriate and acceptable.

Approval No. \_\_\_\_\_

华西医院实验动物伦理委员会主席

Signature of Chairman

时间

Date

2022.3.2

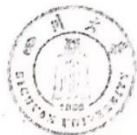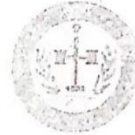

Supplement: s1 [file s1]
