# Supplementary material for: Transcriptional and Epigenetic Alterations in the Progression of Non-Alcoholic Fatty Liver Disease and Biomarkers Helping to Diagnose Non-Alcoholic Steatohepatitis
Source: Biomedicines. 2023 Mar 21;11(3):970. doi: 10.3390/biomedicines11030970 (PMC10046227; doi:10.3390/biomedicines11030970)
Supplement: Supplementary file 1 [file biomedicines-11-00970-s001.zip]

Archive with 11 entries (11 files):
- Approval of Animal Ethical and Welfare.pdf
- Supplementary Figure S1-S3 20221031.pdf
- Supplementary Table S1.xlsx
- Supplementary Table S2.xlsx
- Supplementary Table S3.xlsx
- Supplementary Table S4.xlsx
- Supplementary Table S5.xlsx
- Supplementary Table S6.xlsx
- Supplementary Table S7.xlsx
- Supplementary Table S8.xlsx
- Supplementary Table S9.xlsx
