# Supplementary material for: Transcriptional and Epigenetic Alterations in the Progression of Non-Alcoholic Fatty Liver Disease and Biomarkers Helping to Diagnose Non-Alcoholic Steatohepatitis
Source: Biomedicines. 2023 Mar 21;11(3):970. doi: 10.3390/biomedicines11030970 (PMC10046227; doi:10.3390/biomedicines11030970)
Supplement: Supplementary file 1 [file biomedicines-11-00970-s001.zip › Supplementary Table S1.xlsx]

## Sheet: Sheet1
Score	NAFL1	NAFL2	NAFL3	NAFL4	NAFL5	NASH1	NASH2	NASH3	NASH4	NASH5
Hepatic stestosis	1	1	0	0	1	3	3	3	3	3
Inflammation in the lobule	0	0	1	2	2	3	2	3	2	2
Hepatocellular ballooning	1	2	2	2	1	2	2	1	2	2
NAS integral	2	3	3	4	4	8	7	7	7	7
