# Supplementary material for: Transcriptional and Epigenetic Alterations in the Progression of Non-Alcoholic Fatty Liver Disease and Biomarkers Helping to Diagnose Non-Alcoholic Steatohepatitis
Source: Biomedicines. 2023 Mar 21;11(3):970. doi: 10.3390/biomedicines11030970 (PMC10046227; doi:10.3390/biomedicines11030970)
Supplement: Supplementary file 1 [file biomedicines-11-00970-s001.zip › Supplementary Table S2.xlsx]

## Sheet: Sheet1
Gene	Forward primer	Reverse primer
THOP1	CAGTGCAGAGGAACATTCTCG	CACGTCCTGTCTCATGCTCAT
ApoF	ATAGCCTCCGACTCATCCTGA	TCTGCATCTGGTATCCCAACTT
BICC1	CGCGTGGACAGGAAGAAACT	TGCAATCTGCGTGTTTGTCTC
