# Supplementary material for: Transcriptional and Epigenetic Alterations in the Progression of Non-Alcoholic Fatty Liver Disease and Biomarkers Helping to Diagnose Non-Alcoholic Steatohepatitis
Source: Biomedicines. 2023 Mar 21;11(3):970. doi: 10.3390/biomedicines11030970 (PMC10046227; doi:10.3390/biomedicines11030970)
Supplement: Supplementary file 1 [file biomedicines-11-00970-s001.zip › Supplementary Table S3.xlsx]

## Sheet: Normal vs NAFL
	logFC	AveExpr	t	P.Value	adj.P.Val	B	symbol	change	ENTREZID
6	-0.520717	7.40732	-7.28682	2.87444e-11	8.22952e-08	15.2477	HOOK1	down	51361
8	-0.780452	5.97272	-7.17072	5.27492e-11	1.13266e-07	14.6713	CCDC146	down	57639
9	-0.677387	5.24547	-7.08551	8.21606e-11	1.56817e-07	14.2507	CMYA5	down	202333
11	-0.531293	7.43413	-7.034	1.07289e-10	1.67546e-07	13.9974	PLSCR4	down	57088
21	-0.505168	3.1472	-6.73715	4.91492e-10	4.02041e-07	12.5535	DKK3	down	27122
29	-1.09918	6.52255	-6.61962	8.90844e-10	5.27687e-07	11.9896	VIL1	down	7429
45	-0.831562	3.65414	-6.38323	2.90371e-09	1.10844e-06	10.8698	CXCL6	down	6372
55	-0.663376	3.96847	-6.26728	5.14562e-09	1.60712e-06	10.3279	HOMER1	down	9456
56	-0.741481	4.50526	-6.24044	5.87002e-09	1.80063e-06	10.2032	ID4	down	3400
96	-0.566513	7.97608	-5.76216	5.8471e-08	1.04627e-05	8.02966	AGTR1	down	185
103	-0.580794	7.19767	-5.69211	8.1214e-08	1.34445e-05	7.71948	TMPO	down	7112
112	-0.521261	4.01936	-5.64099	1.03077e-07	1.57152e-05	7.49452	CADM2	down	253559
118	-0.515369	6.44008	-5.60932	1.1941e-07	1.71714e-05	7.35576	ZNF260	down	339324
131	-0.563123	6.55864	-5.53476	1.68525e-07	2.20986e-05	7.03086	PYROXD1	down	79912
168	-0.653189	2.80362	-5.42258	2.81604e-07	2.87462e-05	6.54703	NTS	down	4922
180	-0.500376	7.07955	-5.35499	3.82582e-07	3.6511e-05	6.25847	KCNT2	down	343450
213	-0.687266	4.10872	-5.25146	6.09143e-07	4.906e-05	5.82081	SMOC2	down	64094
232	-0.731438	5.26044	-5.20952	7.34351e-07	5.43737e-05	5.64502	CRYAB	down	1410
261	-0.614538	3.41169	-5.11202	1.13009e-06	7.43778e-05	5.23995	OMD	down	4958
303	-1.05829	7.17378	-5.00445	1.80803e-06	0.000102228	4.7988	P4HA1	down	5033
304	-0.616355	5.63378	-5.00377	1.81336e-06	0.000102228	4.79604	DSEL	down	92126
326	-0.555163	5.26314	-4.94261	2.36232e-06	0.000124478	4.54801	RCAN2	down	10231
355	-0.689221	3.37458	-4.88339	3.04595e-06	0.000147181	4.3098	PWAR6	down	100506965
377	-0.50489	9.88589	-4.8409	3.65089e-06	0.000166353	4.14013	HSD17B11	down	51170
431	-1.0931	8.95742	-4.74239	5.53605e-06	0.000220258	3.75054	IGFBP2	down	3485
447	-0.846323	6.16733	-4.72264	6.014e-06	0.000231115	3.67311	MGP	down	4256
600	-0.571089	8.54684	-4.50855	1.45507e-05	0.000416515	2.84826	CFHR4	down	10877
627	-0.58064	7.16992	-4.46573	1.73086e-05	0.000474207	2.68654	ALDH6A1	down	4329
639	-0.531567	5.53302	-4.4487	1.85394e-05	0.000498313	2.62256	SKA2	down	348235
714	-0.625558	5.99478	-4.35787	2.667e-05	0.000641648	2.2842	EPHA3	down	2042
854	-0.61473	6.71456	-4.22091	4.5716e-05	0.000919567	1.78375	SLC16A7	down	9194
900	-0.923075	6.20873	-4.16862	5.59889e-05	0.00106864	1.59585	EFEMP1	down	2202
958	-0.505673	8.84222	-4.1159	6.8569e-05	0.00122952	1.40815	ARL5B	down	221079
976	-0.532649	5.73733	-4.10324	7.197e-05	0.0012667	1.36336	MTHFD2L	down	441024
1007	-0.656265	5.73846	-4.07764	7.93446e-05	0.00135351	1.27312	TNC	down	3371
1049	-0.639764	5.67337	-4.03871	9.19671e-05	0.00150602	1.13665	TAGLN	down	6876
1089	-0.654076	7.58953	-3.99912	0.000106753	0.00168394	0.998946	IGF1	down	3479
1192	-0.610802	9.03214	-3.90559	0.000151229	0.00217938	0.677754	HAL	down	3034
1194	-0.532936	9.857	-3.90322	0.000152562	0.0021933	0.669671	SLC38A2	down	54407
1216	-0.653899	7.10511	-3.88523	0.000163019	0.0023029	0.608617	CHST9	down	83539
1275	-0.64087	4.5503	-3.84005	0.000192382	0.00259123	0.456205	PDLIM3	down	27295
1296	-0.641785	4.57626	-3.82707	0.000201705	0.00267352	0.412687	ACTG2	down	72
1476	-0.61723	4.15301	-3.70119	0.000317358	0.00369348	-0.00334276	FAM169A	down	26049
1497	-0.573956	6.40878	-3.69102	0.000329039	0.00377571	-0.0364621	SPARCL1	down	8404
1586	-0.65533	9.54488	-3.63704	0.000398192	0.00431282	-0.211082	C7	down	730
1712	-0.579936	4.36738	-3.55922	0.000522393	0.00524163	-0.459123	OGN	down	4969
1798	-0.523495	4.94639	-3.51289	0.000612824	0.00585489	-0.604714	NEXN	down	91624
1801	-0.587894	5.46719	-3.50999	0.000618956	0.00590362	-0.613786	GEM	down	2669
1852	-0.558498	5.68228	-3.48481	0.000674615	0.00624986	-0.692211	BICC1	down	80114
1922	-0.638353	6.08232	-3.44834	0.000763623	0.00682493	-0.804969	SOCS2	down	8835
1977	-0.771065	7.3005	-3.41671	0.000849651	0.00738088	-0.901985	CCN2	down	1490
2130	-0.582907	7.74284	-3.33151	0.00112876	0.0091032	-1.1596	LUM	down	4060
7	0.587199	7.11743	7.20997	4.29791e-11	1.05471e-07	14.8658	SIGIRR	up	59307
12	0.621881	8.73374	6.98199	1.40356e-10	1.96107e-07	13.7425	ABCC6	up	368
19	0.588783	7.26031	6.77624	4.02889e-10	3.64254e-07	12.742	ARSA	up	410
22	0.53877	9.31674	6.7057	5.7653e-10	4.33756e-07	12.4022	TMEM63A	up	9725
90	0.526152	3.53885	5.82348	4.37801e-08	8.35616e-06	8.30295	TAS2R41	up	259287
135	0.523959	6.71776	5.5221	1.78633e-07	2.273e-05	6.97595	SLC19A1	up	6573
137	0.606912	5.84429	5.50869	1.89981e-07	2.38212e-05	6.91789	HAPLN4	up	404037
149	0.575432	8.72782	5.48476	2.12016e-07	2.42358e-05	6.81446	TM6SF2	up	53345
171	0.528111	8.70239	5.41888	2.86381e-07	2.87462e-05	6.53119	SLC6A12	up	6539
189	0.592382	8.76949	5.33379	4.20993e-07	3.82554e-05	6.16841	PKLR	up	5313
250	0.826373	5.64473	5.15325	9.42331e-07	6.47494e-05	5.41064	GRID1	up	2894
298	0.943348	9.55329	5.01234	1.74712e-06	0.000100415	4.83095	FADS2	up	9415
301	0.517535	8.65058	5.00616	1.79464e-06	0.000102211	4.80577	GALK1	up	2584
309	0.725166	7.421	4.98209	1.99196e-06	0.000110738	4.70792	GOLM1	up	51280
329	0.555509	6.77451	4.93896	2.39974e-06	0.00012466	4.53328	SYT7	up	9066
392	0.833079	6.8138	4.81157	4.13496e-06	0.0001812	4.02356	MAMDC4	up	158056
395	0.52918	7.47654	4.80614	4.23123e-06	0.00018401	4.00202	RAB26	up	25837
510	0.597862	5.64229	4.61754	9.31038e-06	0.000312175	3.26478	RAPGEFL1	up	51195
567	0.664898	3.98159	4.54349	1.26196e-05	0.000382328	2.98101	GAS6-AS1	up	650669
585	0.580522	7.10074	4.52254	1.37452e-05	0.000403616	2.90135	PRKCE	up	5581
671	0.885912	9.65761	4.40624	2.19881e-05	0.000562908	2.46376	FASN	up	2194
677	0.569181	5.4925	4.40175	2.23868e-05	0.000567567	2.44703	ZIC1	up	7545
704	1.0686	5.86897	4.37282	2.51292e-05	0.000613167	2.33954	NPY6R	up	4888
834	0.84487	6.23416	4.24046	4.23601e-05	0.000872495	1.85448	SLC29A4	up	222962
865	0.673995	5.49185	4.20615	4.84165e-05	0.000961501	1.73053	NPBWR1	up	2831
875	0.86236	7.94782	4.19359	5.08334e-05	0.00099796	1.68537	FNDC5	up	252995
916	0.622251	4.22093	4.16	5.78817e-05	0.00108547	1.56505	ZNF385D	up	79750
954	0.623568	9.70893	4.12097	6.72487e-05	0.0012109	1.42615	DGAT2	up	84649
1101	0.569466	6.89689	3.9886	0.000111052	0.00173265	0.962507	IGSF9	up	57549
1129	0.676838	6.71496	3.96531	0.000121154	0.00184339	0.882164	OXT	up	5020
1383	0.732303	7.37456	3.76326	0.000254133	0.00315654	0.200424	SORT1	up	6272
1389	0.996408	6.9401	3.75893	0.000258129	0.00319233	0.186102	NCAM2	up	4685
1393	0.633437	9.14747	3.75545	0.000261376	0.0032232	0.174631	SRD5A2	up	6716
1396	0.639694	4.58041	3.75387	0.000262867	0.00323462	0.169411	MMP9	up	4318
1629	0.531456	10.6606	3.60772	0.000441296	0.0046524	-0.305056	SCD	up	6319
1650	0.924203	6.97321	3.59497	0.000461382	0.00480341	-0.345727	PEG10	up	23089
1651	1.34415	8.87578	3.59464	0.000461905	0.00480594	-0.346762	CYP7A1	up	1581
1696	0.598732	7.65839	3.56679	0.000508863	0.00515404	-0.435173	CACNA1H	up	8912
1711	0.510027	5.41451	3.56074	0.00051965	0.00521715	-0.454319	MROH2A	up	339766
1717	0.699917	8.22459	3.5558	0.000528612	0.00528858	-0.469922	HBB	up	3043
1850	0.591871	7.41855	3.48533	0.000673415	0.00624986	-0.69059	PLIN1	up	5346
1946	0.527083	6.27357	3.43448	0.000800278	0.00706432	-0.847591	GINS2	up	51659
1993	0.568131	5.35902	3.41066	0.0008671	0.00747368	-0.920448	IP6K3	up	117283
2179	0.569716	9.55645	3.30387	0.00123635	0.00974667	-1.242	CNDP1	up	84735
2184	0.531876	10.1635	3.30034	0.00125077	0.00983778	-1.25249	CYP2D6	up	1565

## Sheet: NAFL vs NASH
	logFC	AveExpr	t	P.Value	adj.P.Val	B	symbol	change	ENTREZID
21	-0.606955	6.84518	-8.83388	6.56349e-15	5.36894e-12	23.3792	THOP1	down	7064
53	-0.610746	8.91989	-7.48476	1.01246e-11	3.28152e-09	16.3074	ACSM3	down	6296
55	-1.33552	9.66639	-7.44743	1.23358e-11	3.85279e-09	16.1173	CYP2C19	down	1557
131	-0.534651	9.95404	-6.21871	6.52932e-09	8.56188e-07	10.0923	APOF	down	319
136	-0.927134	8.5731	-6.17338	8.1474e-09	1.02909e-06	9.8802	OAT	down	4942
158	-0.50762	10.3942	-5.98395	2.03745e-08	2.21514e-06	9.0026	FETUB	down	26998
161	-1.1504	10.3171	-5.96634	2.217e-08	2.35927e-06	8.92179	MT1M	down	4499
190	-0.955432	9.2049	-5.75272	6.11264e-08	5.50341e-06	7.95207	GNMT	down	27232
194	-0.580255	5.7218	-5.72879	6.83973e-08	6.05633e-06	7.8447	PCOLCE2	down	26577
247	-0.619534	6.85854	-5.4449	2.54379e-07	1.76912e-05	6.59138	KCNN2	down	3781
256	-0.769409	8.05758	-5.4156	2.90682e-07	1.94734e-05	6.46425	CLEC4M	down	10332
286	-0.667858	6.6194	-5.26781	5.66221e-07	3.39116e-05	5.8294	FITM1	down	161247
297	-0.561863	8.87439	-5.22947	6.71944e-07	3.88641e-05	5.66655	CLEC4G	down	339390
305	-0.529938	7.65775	-5.18509	8.18472e-07	4.60974e-05	5.47897	SLC16A10	down	117247
315	-0.501813	11.5969	-5.13333	1.02891e-06	5.61098e-05	5.26151	MT1X	down	4501
332	-0.748321	9.55645	-5.08867	1.2521e-06	6.4785e-05	5.07501	CNDP1	down	84735
452	-0.77593	12.3761	-4.69495	6.75191e-06	0.000256603	3.47859	MT1F	down	4494
619	-0.573117	12.4587	-4.3133	3.18216e-05	0.000882588	2.01793	MT1G	down	4495
630	-0.783327	7.4062	-4.29639	3.4017e-05	0.000927529	1.95528	CETP	down	1071
817	-0.554661	6.99997	-4.01107	0.000102068	0.00214605	0.926666	MARCO	down	8685
1013	-0.851637	6.9401	-3.76732	0.000250448	0.00424698	0.0913753	NCAM2	down	4685
1206	-0.627939	6.42817	-3.56322	0.000515215	0.00733445	-0.57585	FAM151A	down	338094
1221	-0.612234	9.72016	-3.55407	0.000531787	0.0074816	-0.60504	LYVE1	down	10894
1	1.39723	3.65414	12.5766	3.97072e-24	6.8209e-20	43.7876	CXCL6	up	6372
2	0.846702	4.41394	11.2099	9.47753e-21	5.8679e-17	36.3257	COL15A1	up	1306
3	0.939068	6.14114	11.1962	1.02478e-20	5.8679e-17	36.2506	SOX9	up	6662
4	1.31845	5.99478	10.7701	1.16459e-19	5.00135e-16	33.9139	EPHA3	up	2042
5	1.07004	4.50526	10.56	3.85626e-19	1.32486e-15	32.7621	ID4	up	3400
6	0.660787	3.1472	10.3336	1.39948e-18	4.00671e-15	31.5217	DKK3	up	27122
7	1.36075	5.68228	9.95604	1.19523e-17	2.84794e-14	29.4568	BICC1	up	80114
8	0.633704	4.14947	9.93768	1.32632e-17	2.84794e-14	29.3566	CTHRC1	up	115908
9	1.27354	7.21556	9.75503	3.73107e-17	7.12137e-14	28.3605	COL1A1	up	1277
11	1.29704	3.66272	9.62841	7.63151e-17	1.19176e-13	27.6712	STMN2	up	11075
12	1.06288	4.10872	9.52338	1.3802e-16	1.97575e-13	27.1004	SMOC2	up	64094
13	0.689705	6.20889	9.47841	1.7783e-16	2.34981e-13	26.8562	CTSK	up	1513
14	1.76553	6.20873	9.34938	3.67558e-16	4.50993e-13	26.1567	EFEMP1	up	2202
15	0.767135	6.54458	9.30599	4.69022e-16	5.37123e-13	25.9218	ROBO1	up	6091
16	0.843078	5.97272	9.08313	1.63533e-15	1.75573e-12	24.7184	CCDC146	up	57639
17	0.794136	7.38054	9.04916	1.97723e-15	1.99793e-12	24.5354	COL3A1	up	1281
20	0.593304	3.90917	8.89153	4.76275e-15	4.09072e-12	23.6883	CD109	up	135228
22	1.28087	5.47272	8.81391	7.33399e-15	5.72651e-12	23.2723	DCDC2	up	51473
23	1.62737	5.02792	8.77996	8.85594e-15	6.61423e-12	23.0905	CD24	up	100133941
24	0.898408	2.80362	8.74566	1.0713e-14	7.66781e-12	22.9071	NTS	up	4922
25	1.25365	6.8906	8.72213	1.22058e-14	8.38683e-12	22.7814	THBS2	up	7058
26	1.28769	7.74284	8.62985	2.03441e-14	1.34412e-11	22.2891	LUM	up	4060
27	0.701555	4.92576	8.59967	2.40372e-14	1.5293e-11	22.1283	PWWP3B	up	139221
28	0.640166	6.59245	8.49557	4.26862e-14	2.6188e-11	21.5749	COL6A3	up	1293
29	0.903863	6.98631	8.42215	6.39339e-14	3.78709e-11	21.1857	COL1A2	up	1278
30	0.543995	4.97378	8.37265	8.39015e-14	4.8042e-11	20.9238	COL5A2	up	1290
31	0.617009	5.45931	8.32342	1.09899e-13	6.08983e-11	20.6637	TCEAL9	up	51186
32	0.813473	4.00109	8.28652	1.34507e-13	7.2205e-11	20.469	CLIC6	up	54102
34	0.775172	4.37384	8.22657	1.8667e-13	9.43125e-11	20.1532	ELOVL7	up	79993
35	0.912511	5.59513	8.19327	2.23868e-13	1.09874e-10	19.9782	C12orf75	up	387882
36	0.832781	5.9143	8.08545	4.02632e-13	1.92123e-10	19.4127	COL4A1	up	1282
37	1.6251	4.70912	8.06348	4.53675e-13	2.10628e-10	19.2977	EPCAM	up	4072
38	0.85513	3.41068	8.01688	5.84145e-13	2.64064e-10	19.0542	ENPP5	up	59084
39	0.605246	3.29168	7.91128	1.03409e-12	4.55477e-10	18.5041	TMEM200A	up	114801
40	1.26002	5.51406	7.89928	1.1033e-12	4.73812e-10	18.4417	FABP4	up	2167
41	0.561154	7.79773	7.88506	1.19121e-12	4.99087e-10	18.3679	ITGAV	up	3685
42	0.735515	4.37901	7.84712	1.46142e-12	5.97723e-10	18.171	LPL	up	4023
45	0.554761	5.30416	7.79664	1.91721e-12	7.2301e-10	17.9095	IFT80	up	57560
46	1.11339	5.46719	7.79481	1.93611e-12	7.2301e-10	17.9001	GEM	up	2669
48	1.11087	7.10511	7.73961	2.6036e-12	9.31764e-10	17.6148	CHST9	up	83539
49	0.606032	3.83511	7.72656	2.79218e-12	9.7886e-10	17.5475	GPX8	up	493869
50	0.543076	6.14888	7.70177	3.18835e-12	1.09539e-09	17.4197	UBE2Q2	up	92912
52	0.680687	5.84136	7.50102	9.28827e-12	3.06834e-09	16.3904	RASSF3	up	283349
54	1.14132	6.16733	7.46804	1.10617e-11	3.51884e-09	16.2222	MGP	up	4256
56	0.70925	5.26314	7.40434	1.54895e-11	4.72727e-09	15.8982	RCAN2	up	10231
58	0.757803	5.49353	7.35456	2.01356e-11	5.9636e-09	15.6457	ALKAL2	up	285016
59	1.12215	9.54488	7.3028	2.64323e-11	7.69582e-09	15.3839	C7	up	730
62	0.530898	5.281	7.21061	4.28351e-11	1.18681e-08	14.9195	LOXL1	up	4016
63	0.63602	5.79805	7.1706	5.27807e-11	1.43915e-08	14.7187	NEBL	up	10529
65	0.633247	3.96847	7.01526	1.18206e-10	3.12392e-08	13.9433	HOMER1	up	9456
66	0.592637	7.96597	7.00567	1.24207e-10	3.23276e-08	13.8957	LAMB1	up	3912
68	0.569123	6.60351	6.98896	1.35397e-10	3.42037e-08	13.8128	HMCN1	up	83872
69	0.603424	6.25197	6.98594	1.3752e-10	3.42365e-08	13.7979	COL4A2	up	1284
74	0.540829	3.60731	6.93641	1.7749e-10	4.12017e-08	13.5526	PCLAF	up	9768
77	0.850449	4.80535	6.85824	2.6507e-10	5.91347e-08	13.1672	PDGFD	up	80310
79	0.584521	4.79708	6.83033	3.05735e-10	6.648e-08	13.03	FNDC1	up	84624
85	0.557585	5.0376	6.76223	4.32662e-10	8.74385e-08	12.6964	ERICH5	up	203111
88	0.583638	6.18425	6.72641	5.19059e-10	1.01323e-07	12.5216	GPX7	up	2882
94	0.574733	5.60629	6.62576	8.63662e-10	1.5783e-07	12.0326	GJA1	up	2697
97	0.532032	5.56447	6.57546	1.11252e-09	1.97019e-07	11.7896	SERPINE2	up	5270
99	0.58205	5.57763	6.56794	1.15536e-09	2.00472e-07	11.7533	THSD7A	up	221981
102	0.73404	4.38057	6.54443	1.29998e-09	2.18933e-07	11.6401	CENPU	up	79682
108	0.870319	4.04847	6.40921	2.55253e-09	4.05994e-07	10.9927	PLCXD3	up	345557
109	0.510785	7.93317	6.37371	3.04392e-09	4.79711e-07	10.8239	CAPN2	up	824
116	0.83374	7.69362	6.32678	3.83888e-09	5.68484e-07	10.6014	FAT1	up	2195
121	0.560952	7.2164	6.25807	5.38349e-09	7.60235e-07	10.2772	SRPX	up	8406
133	0.83025	6.92196	6.21073	6.78924e-09	8.76884e-07	10.0549	AQP1	up	358
147	0.517763	5.58466	6.04882	1.49099e-08	1.73198e-06	9.30147	NFASC	up	23114
150	0.624658	4.40646	6.04353	1.52956e-08	1.75166e-06	9.27701	GINS1	up	9837
163	0.795758	4.195	5.9581	2.30635e-08	2.43058e-06	8.88398	KCNJ16	up	3773
165	0.731092	5.10358	5.93565	2.56786e-08	2.67338e-06	8.78123	SPON1	up	10418
166	0.589122	7.44993	5.92841	2.65823e-08	2.7371e-06	8.74814	HGF	up	3082
170	0.601397	6.55791	5.90017	3.04164e-08	3.07349e-06	8.61926	ANK3	up	288
174	1.90494	7.51159	5.86671	3.56655e-08	3.52105e-06	8.46702	CHI3L1	up	1116
179	1.9174	4.32273	5.83225	4.19989e-08	4.03048e-06	8.31074	AKR1B10	up	57016
182	0.594524	5.23579	5.79894	4.91648e-08	4.6404e-06	8.16016	PROM1	up	8842
186	0.506392	4.43125	5.77014	5.63156e-08	5.20102e-06	8.03039	ZWINT	up	11130
189	0.503869	5.44083	5.75594	6.02084e-08	5.47228e-06	7.96653	NUSAP1	up	51203
196	0.530276	4.75984	5.71785	7.19959e-08	6.30993e-06	7.79572	CCDC102B	up	79839
197	0.513785	6.41729	5.71626	7.25352e-08	6.32492e-06	7.78859	SLC12A2	up	6558
198	0.511174	4.68255	5.71197	7.40058e-08	6.42056e-06	7.76942	ITM2A	up	9452
205	0.709998	4.12972	5.67841	8.65828e-08	7.25522e-06	7.61952	RGS4	up	5999
206	0.611769	4.98564	5.67175	8.93138e-08	7.44773e-06	7.58987	MTHFD2	up	10797
208	0.531307	6.5035	5.66866	9.06123e-08	7.47538e-06	7.57609	C1orf198	up	84886
210	0.524104	4.10122	5.65786	9.52934e-08	7.7921e-06	7.528	LXN	up	56925
211	0.586462	5.45757	5.65692	9.57116e-08	7.7921e-06	7.52382	SLC44A3	up	126969
222	0.606788	5.56625	5.60029	1.24518e-07	9.63502e-06	7.27267	MAP1B	up	4131
224	0.656131	5.38018	5.58594	1.33072e-07	1.0205e-05	7.20927	NPNT	up	255743
226	0.824738	5.36192	5.57378	1.4077e-07	1.06582e-05	7.15561	VCAN	up	1462
239	0.756309	8.09358	5.49102	2.0602e-07	1.476e-05	6.79237	SULF2	up	55959
246	0.529402	9.94526	5.44631	2.52745e-07	1.7649e-05	6.59752	IGFBP7	up	3490
250	1.07271	3.83486	5.43505	2.66059e-07	1.82814e-05	6.54859	CCL20	up	6364
259	0.843922	4.47085	5.40254	3.08459e-07	2.04583e-05	6.4077	DTL	up	51514
260	0.768059	4.15301	5.40058	3.11222e-07	2.05622e-05	6.3992	FAM169A	up	26049
262	0.552695	3.41169	5.39114	3.24836e-07	2.12979e-05	6.35841	OMD	up	4958
270	0.749407	8.14769	5.35201	3.87775e-07	2.46711e-05	6.18974	FBLN5	up	10516
277	0.766748	6.10826	5.28468	5.25009e-07	3.25582e-05	5.90131	KRT7	up	3855
280	0.833983	8.33223	5.27969	5.36881e-07	3.29377e-05	5.88003	ENPP2	up	5168
282	0.844027	5.00192	5.27447	5.49576e-07	3.34774e-05	5.85779	CFTR	up	1080
288	0.514693	5.49647	5.26346	5.77346e-07	3.44363e-05	5.81089	HSPA2	up	3306
291	0.957889	6.66936	5.24924	6.15212e-07	3.63165e-05	5.75045	CCL19	up	6363
299	0.663355	4.94639	5.21975	7.01657e-07	4.03112e-05	5.6254	NEXN	up	91624
304	0.580797	3.60991	5.18693	8.11812e-07	4.58727e-05	5.48674	RRM2	up	6241
317	0.556472	6.97459	5.11933	1.09434e-06	5.93014e-05	5.20293	PODXL	up	5420
324	0.554893	3.60753	5.10675	1.15656e-06	6.13192e-05	5.1504	CENPK	up	64105
335	0.564072	5.47937	5.08466	1.27427e-06	6.53414e-05	5.05835	FCAMR	up	83953
342	0.700884	5.35017	5.05793	1.43239e-06	7.19463e-05	4.94728	THY1	up	7070
347	0.559287	5.64171	5.03339	1.5942e-06	7.89196e-05	4.8457	MCM6	up	4175
351	0.60062	5.26044	5.01615	1.71841e-06	8.40991e-05	4.77449	CRYAB	up	1410
363	0.715408	4.03028	4.9762	2.04346e-06	9.67011e-05	4.61014	FAM3B	up	54097
371	0.796692	4.7311	4.94883	2.29976e-06	0.000106483	4.49809	DTNA	up	1837
377	0.670438	4.9516	4.93037	2.49007e-06	0.00011346	4.42272	CHST4	up	10164
399	0.662363	4.98692	4.84235	3.6285e-06	0.000156216	4.06601	RGCC	up	28984
406	0.507733	5.72723	4.82324	3.93544e-06	0.00016651	3.98913	LTBP2	up	4053
419	0.792774	3.67938	4.77761	4.77334e-06	0.000195695	3.80647	FMO1	up	2326
422	0.517316	6.78572	4.77364	4.85407e-06	0.000197551	3.7906	AEBP1	up	165
423	0.640131	6.56982	4.77312	4.8646e-06	0.000197551	3.78855	SLC38A1	up	81539
437	0.522765	5.79861	4.729	5.85588e-06	0.000230188	3.61316	COL12A1	up	1303
443	0.619702	4.08008	4.71408	6.23351e-06	0.000241374	3.55409	CA12	up	771
481	0.50794	4.71545	4.64113	8.44489e-06	0.000301593	3.26725	ANXA3	up	306
494	0.575695	4.79262	4.60966	9.61782e-06	0.000334443	3.14448	FRZB	up	2487
495	0.592772	6.02589	4.60607	9.7614e-06	0.00033875	3.13049	PDGFA	up	5154
511	0.523086	4.82798	4.56039	1.17767e-05	0.00039589	2.95344	UHRF1	up	29128
527	0.608288	5.67337	4.5028	1.48947e-05	0.000484721	2.73203	TAGLN	up	6876
539	0.550907	6.25297	4.47878	1.64184e-05	0.000523258	2.64028	BIRC3	up	330
542	0.614159	5.73846	4.47468	1.6693e-05	0.000529063	2.62466	TNC	up	3371
703	0.996139	5.06268	4.16961	5.57755e-05	0.00136289	1.49164	CXCL8	up	3576
731	0.538226	4.77657	4.1313	6.46391e-05	0.00151898	1.35358	VWF	up	7450
762	0.524843	3.96311	4.08537	7.70444e-05	0.00173683	1.18938	ASPM	up	259266
776	0.510141	6.75188	4.06402	8.35607e-05	0.00184975	1.11349	ME1	up	4199
787	0.595806	4.39881	4.05317	8.707e-05	0.00190049	1.07506	MMP7	up	4316
896	0.5038	4.3113	3.90778	0.00015001	0.00287597	0.567724	MOXD1	up	26002
990	0.722474	5.42745	3.79071	0.000230162	0.00399366	0.169756	GPC3	up	2719
1082	0.610635	8.42464	3.68824	0.000332306	0.00527574	-0.170686	IL32	up	9235
1177	0.638172	4.96865	3.58638	0.000475387	0.00693815	-0.501632	CH25H	up	9023

## Sheet: Normal vs NASH
	logFC	AveExpr	t	P.Value	adj.P.Val	B	symbol	change	ENTREZID
1	-0.980379	8.54684	-7.73976	2.60145e-12	2.49009e-08	17.4385	CFHR4	down	10877
4	-0.538485	10.2157	-7.38556	1.71018e-11	7.34438e-08	15.6667	ACADSB	down	36
6	-0.720292	9.95404	-7.14474	6.03915e-11	1.72901e-07	14.4797	APOF	down	319
8	-0.536335	7.35782	-6.98499	1.38199e-10	2.65596e-07	13.701	DNAJC12	down	56521
14	-0.532423	6.02468	-6.59123	1.02772e-09	1.22775e-06	11.8146	L3MBTL3	down	84456
15	-0.608292	4.01936	-6.58282	1.07208e-09	1.22775e-06	11.7749	CADM2	down	253559
29	-0.652936	9.45829	-6.06164	1.40151e-08	8.30179e-06	9.36119	CFHR5	down	81494
30	-0.996243	6.52255	-5.99972	1.88877e-08	1.08151e-05	9.08134	VIL1	down	7429
40	-0.559695	5.24547	-5.85445	3.7803e-08	1.62345e-05	8.43088	CMYA5	down	202333
62	-0.711322	7.16992	-5.4708	2.25995e-07	6.08655e-05	6.75721	ALDH6A1	down	4329
63	-1.14988	9.66639	-5.46836	2.28532e-07	6.08655e-05	6.74678	CYP2C19	down	1557
106	-0.513356	8.87932	-5.13393	1.02619e-06	0.000166301	5.34472	ABCB11	down	8647
149	-0.518154	8.79187	-4.89221	2.93309e-06	0.000338152	4.367	AMDHD1	down	144193
170	-0.936898	9.2049	-4.81077	4.14912e-06	0.000419166	4.04468	GNMT	down	27232
197	-0.50591	6.38508	-4.71754	6.14379e-06	0.000535726	3.68027	NIPAL1	down	152519
204	-0.607979	5.73733	-4.68353	7.08111e-06	0.000595051	3.54857	MTHFD2L	down	441024
217	-0.546161	6.97395	-4.63399	8.69835e-06	0.000682834	3.35787	RBMS1	down	5937
230	-0.655472	3.63136	-4.60319	9.878e-06	0.000735219	3.24004	PPM1K	down	152926
253	-0.573608	7.45961	-4.5122	1.43366e-05	0.000972662	2.8952	SLC19A2	down	10560
314	-0.521393	9.10741	-4.3564	2.68267e-05	0.00146761	2.31625	CTH	down	1491
366	-0.581712	10.0823	-4.23103	4.39484e-05	0.00206269	1.86123	NAMPT	down	10135
418	-0.647958	9.03214	-4.14317	6.17563e-05	0.00253792	1.54827	HAL	down	3034
456	-0.864401	7.17378	-4.08758	7.63993e-05	0.00287804	1.35279	P4HA1	down	5033
539	-0.650004	7.58953	-3.97422	0.00011719	0.00373485	0.960437	IGF1	down	3479
584	-0.549805	8.77156	-3.90032	0.000154199	0.00453214	0.709264	AASS	down	10157
624	-0.510614	7.3089	-3.83149	0.000198482	0.00546399	0.478609	RETREG1	down	54463
658	-0.873787	8.95742	-3.79091	0.000229998	0.00600097	0.344145	IGFBP2	down	3485
718	-0.529758	7.29348	-3.72008	0.000296694	0.00709762	0.112152	IL1RN	down	3557
741	-0.620796	4.57626	-3.70191	0.000316547	0.00733826	0.0532112	ACTG2	down	72
742	-0.741433	6.98474	-3.70114	0.000317419	0.00734854	0.05071	NFIL3	down	4783
840	-0.663964	3.53943	-3.58571	0.000476503	0.00974321	-0.318284	PCDH20	down	64881
2	1.44389	5.51406	7.71953	2.89917e-12	2.49009e-08	17.3366	FABP4	up	2167
3	0.821783	4.37901	7.47695	1.05522e-11	6.04217e-08	16.121	LPL	up	4023
7	0.566207	5.69301	7.03575	1.06324e-10	2.6092e-07	13.9476	MACROH2A2	up	55506
10	1.06475	7.21556	6.95523	1.61102e-10	2.65596e-07	13.5568	COL1A1	up	1277
12	1.08753	3.66272	6.88481	2.31334e-10	3.31154e-07	13.2165	STMN2	up	11075
13	0.690233	7.38054	6.70746	5.71426e-10	7.55074e-07	12.3663	COL3A1	up	1281
20	0.785579	6.98631	6.2425	5.81097e-09	4.91348e-06	10.1873	COL1A2	up	1278
34	0.523531	6.72881	5.95997	2.28572e-08	1.15483e-05	8.90248	RPS6KA1	up	6195
37	0.639057	5.88999	5.91908	2.77933e-08	1.29036e-05	8.71917	TP53I3	up	9540
41	0.705901	4.40646	5.82426	4.36177e-08	1.82748e-05	8.29682	GINS1	up	9837
53	0.519619	4.55924	5.64763	9.99408e-08	3.23921e-05	7.52041	MB	up	4151
66	0.571925	5.95793	5.4631	2.34092e-07	6.08655e-05	6.72431	APOL3	up	80833
67	0.803677	6.75188	5.46004	2.37396e-07	6.08655e-05	6.71121	ME1	up	4199
73	0.989948	4.47085	5.40451	3.05706e-07	7.19373e-05	6.47488	DTL	up	51514
74	0.833899	7.69362	5.39652	3.17005e-07	7.35881e-05	6.44097	FAT1	up	2195
88	0.807885	4.08008	5.24097	6.38352e-07	0.000124609	5.78743	CA12	up	771
90	0.687419	4.38057	5.22664	6.80466e-07	0.000128584	5.72783	CENPU	up	79682
91	0.668328	3.91625	5.22641	6.81169e-07	0.000128584	5.72687	SULT1C2	up	6819
92	1.01616	3.67938	5.22244	6.93319e-07	0.000129455	5.71037	FMO1	up	2326
100	0.531702	3.61908	5.18603	8.15055e-07	0.00014001	5.55949	MCM10	up	55388
101	1.006	8.42464	5.18186	8.30284e-07	0.000141214	5.54223	IL32	up	9235
103	0.508323	6.14114	5.16847	8.81003e-07	0.000146417	5.48693	SOX9	up	6662
110	0.869027	4.58041	5.09965	1.19321e-06	0.000186336	5.20418	MMP9	up	4318
120	0.678909	4.82798	5.04764	1.49816e-06	0.000213788	4.99217	UHRF1	up	29128
128	0.853495	5.47272	5.00858	1.77587e-06	0.000235913	4.83383	DCDC2	up	51473
130	0.802249	5.68228	5.00573	1.79799e-06	0.000235913	4.8223	BICC1	up	80114
137	0.549982	4.56662	4.94655	2.32253e-06	0.000291214	4.58408	RASEF	up	158158
143	0.522528	5.84136	4.91056	2.71122e-06	0.000324285	4.44015	RASSF3	up	283349
165	0.692889	5.99478	4.82692	3.87445e-06	0.000403366	4.10831	EPHA3	up	2042
169	0.754731	6.92196	4.81476	4.07953e-06	0.000414664	4.06039	AQP1	up	358
180	0.501984	8.72782	4.78468	4.63306e-06	0.000441566	3.94222	TM6SF2	up	53345
181	0.623286	5.64171	4.78368	4.65267e-06	0.000441566	3.9383	MCM6	up	4175
184	0.953322	6.08951	4.75991	5.14308e-06	0.000480152	3.84527	CXCL9	up	4283
216	1.02716	7.44588	4.63426	8.68871e-06	0.000682834	3.3589	SPP1	up	6696
238	0.769275	6.8906	4.56434	1.15873e-05	0.000836331	3.09224	THBS2	up	7058
239	0.858392	9.55329	4.56094	1.17502e-05	0.000844543	3.07931	FADS2	up	9415
242	0.747822	5.20539	4.54943	1.23166e-05	0.000873865	3.03573	ANXA13	up	312
243	0.591692	5.47937	4.54854	1.23617e-05	0.000873865	3.03235	FCAMR	up	83953
245	0.786191	5.36192	4.53117	1.32703e-05	0.000930441	2.9667	VCAN	up	1462
246	0.983929	5.02792	4.52707	1.34939e-05	0.000942266	2.95125	CD24	up	100133941
247	0.734997	5.35017	4.52336	1.36998e-05	0.000951867	2.93723	THY1	up	7070
260	0.719415	5.64473	4.48626	1.59288e-05	0.00104797	2.79779	GRID1	up	2894
265	0.785048	8.62956	4.47318	1.67946e-05	0.00108754	2.74885	LGALS4	up	3960
272	0.841091	4.7311	4.45558	1.80324e-05	0.00113883	2.68311	DTNA	up	1837
281	0.624	5.7155	4.43753	1.93926e-05	0.0011855	2.61591	MCM2	up	4171
282	0.504399	3.98212	4.4284	2.01177e-05	0.00122547	2.58199	TREM2	up	54209
295	0.558995	6.78572	4.39896	2.26386e-05	0.00131826	2.47294	AEBP1	up	165
306	0.560296	7.10074	4.36497	2.59269e-05	0.00145547	2.34773	PRKCE	up	5581
316	0.725021	5.35902	4.35252	2.72427e-05	0.00148093	2.30205	IP6K3	up	117283
325	0.565663	3.65414	4.34214	2.8389e-05	0.00150051	2.26402	CXCL6	up	6372
336	0.502865	6.07319	4.30855	3.24238e-05	0.0016546	2.14145	FBXO2	up	26232
354	0.618246	7.21227	4.25041	4.07453e-05	0.00197718	1.93092	DEFB1	up	1672
357	0.517777	6.65315	4.24665	4.13492e-05	0.00198963	1.91737	CYP4F22	up	126410
370	0.613961	4.80535	4.22234	4.54611e-05	0.00211062	1.83007	PDGFD	up	80310
378	0.994298	4.70912	4.20734	4.81937e-05	0.00219013	1.77634	EPCAM	up	4072
397	0.74247	3.74799	4.17297	5.50576e-05	0.00237693	1.65384	CDC6	up	990
422	0.510583	5.72723	4.13636	6.33943e-05	0.00258054	1.5242	LTBP2	up	4053
437	0.60202	3.98159	4.11382	6.91173e-05	0.00271693	1.44478	GAS6-AS1	up	650669
444	1.5333	8.87578	4.10049	7.27297e-05	0.0028079	1.39799	CYP7A1	up	1581
445	0.662262	8.09358	4.10045	7.27392e-05	0.0028079	1.39787	SULF2	up	55959
446	1.58047	4.32273	4.09977	7.29283e-05	0.00280888	1.39548	AKR1B10	up	57016
482	0.649652	5.49185	4.05423	8.67198e-05	0.00309061	1.23648	NPBWR1	up	2831
492	0.556296	5.38018	4.03887	9.19089e-05	0.00320891	1.18317	NPNT	up	255743
501	0.70478	7.74284	4.02806	9.57407e-05	0.0032827	1.14571	LUM	up	4060
505	0.601358	4.22093	4.02032	9.85723e-05	0.00334451	1.11898	ZNF385D	up	79750
508	0.640906	4.9516	4.01943	9.89062e-05	0.00334451	1.11588	CHST4	up	10164
513	0.652991	9.04981	4.01122	0.000102009	0.00341109	1.08757	CDHR2	up	54825
524	1.0032	6.82871	3.99439	0.000108666	0.00356234	1.02962	CXCL10	up	3627
531	1.02424	6.97321	3.98408	0.000112946	0.00365123	0.994224	PEG10	up	23089
575	0.779201	6.23416	3.91087	0.000148311	0.0044254	0.744869	SLC29A4	up	222962
586	0.515176	7.05859	3.89494	0.000157293	0.00461088	0.6911	MCM5	up	4174
590	0.782339	9.65761	3.8911	0.000159533	0.00464484	0.678173	FASN	up	2194
600	0.82876	6.66936	3.8731	0.000170453	0.00488006	0.617659	CCL19	up	6363
641	0.931376	5.86897	3.81129	0.000213623	0.00572483	0.411519	NPY6R	up	4888
647	0.842457	6.20873	3.80455	0.000218907	0.00580192	0.389227	EFEMP1	up	2202
773	0.976181	7.0598	3.66222	0.000364382	0.00809749	-0.0747533	TMEM154	up	201799
807	0.705519	7.37456	3.62562	0.000414479	0.00882271	-0.191762	SORT1	up	6272
858	0.670987	5.00192	3.5759	0.000493037	0.00987108	-0.349209	CFTR	up	1080
