# Supplementary material for: Transcriptional and Epigenetic Alterations in the Progression of Non-Alcoholic Fatty Liver Disease and Biomarkers Helping to Diagnose Non-Alcoholic Steatohepatitis
Source: Biomedicines. 2023 Mar 21;11(3):970. doi: 10.3390/biomedicines11030970 (PMC10046227; doi:10.3390/biomedicines11030970)
Supplement: Supplementary file 1 [file biomedicines-11-00970-s001.zip › Supplementary Table S4.xlsx]

## Sheet: Normal vs NASH
	symbol	logFC	AveExpr	t	P.Value	adj.P.Val	B	control_AVG	NASH_AVG	deltaBeta	CHR	MAPINFO	Strand	Type	gene	feature	cgi	feat.cgi	UCSC_CpG_Islands_Name	DHS	Enhancer	Phantom	Probe_SNPs	Probe_SNPs_10	g	ENTREZID
1164	ANO6	-0.120788	0.474153	-4.89455	5.80653e-06	0.00214027	2.45155	0.538683	0.417895	-0.120788	12	45626938	F	II	ANO6	Body	opensea	Body-opensea		TRUE	TRUE				down	196527
1191	ANXA2	-0.143841	0.499569	-5.31762	1.12337e-06	0.00119981	4.05822	0.576415	0.432575	-0.143841	15	60689285	F	II	ANXA2	5'UTR	shore	5'UTR-shore	chr15:60689749-60690430	#N/A	#N/A				down	302
1564	ARHGEF12	-0.189601	0.414722	-5.61515	3.43166e-07	0.000736218	5.22285	0.516016	0.326414	-0.189601	11	120302922	F	II	ARHGEF12	Body	opensea	Body-opensea		TRUE	TRUE				down	23365
1593	ARHGEF2	-0.10919	0.516141	-5.23484	1.55586e-06	0.00136483	3.73901	0.574476	0.465285	-0.10919	1	155946346	F	II	ARHGEF2	Body	shore	Body-shore	chr1:155947678-155948490	TRUE	#N/A				down	9181
1662	ARL3	-0.123636	0.553677	-5.74573	2.02508e-07	0.000605295	5.74192	0.619729	0.496093	-0.123636	10	104436140	F	II	ARL3	3'UTR	opensea	3'UTR-opensea		TRUE	TRUE				down	403
1677	ARL6IP5	-0.11776	0.348219	-4.52947	2.28324e-05	0.00327533	1.1196	0.411132	0.293372	-0.11776	3	69133862	R	II	ARL6IP5	TSS1500	shore	TSS1500-shore	chr3:69134086-69134479	#N/A	#N/A				down	10550
1682	ARMC2	-0.10108	0.467966	-4.53246	2.25826e-05	0.00326182	1.13027	0.521967	0.420887	-0.10108	6	109266451	R	II	ARMC2	Body	opensea	Body-opensea		#N/A	TRUE				down	84071
1867	ATG10	-0.117154	0.528683	-4.96035	4.51399e-06	0.00198359	2.69727	0.591272	0.474118	-0.117154	5	81470056	F	II	ATG10	Body	opensea	Body-opensea		#N/A	TRUE		rs74910474		down	83734
1895	ATM	-0.117036	0.551812	-4.16153	8.61005e-05	0.00537478	-0.163502	0.614338	0.497302	-0.117036	11	108092087	R	II	ATM	TSS1500	shore	TSS1500-shore	chr11:108093211-108093969	#N/A	#N/A				down	472
1939	ATP11B	-0.123184	0.556296	-4.49216	2.61882e-05	0.00342381	0.986637	0.622107	0.498923	-0.123184	3	182513355	F	II	ATP11B	Body	shore	Body-shore	chr3:182510866-182512282	#N/A	#N/A				down	23200
2027	ATXN1	-0.114817	0.575653	-3.86413	0.000241007	0.00880226	-1.15149	0.636994	0.522177	-0.114817	6	16320488	F	II	ATXN1	Body	opensea	Body-opensea		TRUE	TRUE				down	6310
2224	BBC3	-0.102491	0.370172	-4.58843	1.83638e-05	0.00306811	1.33096	0.424927	0.322436	-0.102491	19	47735960	R	II	BBC3	1stExon	shore	1stExon-shore	chr19:47733884-47734806	TRUE	#N/A				down	27113
2490	BRD3	-0.113743	0.381082	-5.61616	3.41784e-07	0.000736218	5.22682	0.441849	0.328106	-0.113743	9	136930919	R	II	BRD3	5'UTR	opensea	5'UTR-opensea		#N/A	#N/A				down	8019
2557	BTG2	-0.102432	0.324986	-4.3594	4.24668e-05	0.00405279	0.518614	0.37971	0.277278	-0.102432	1	203275927	R	II	BTG2	Body	shore	Body-shore	chr1:203274305-203275338	#N/A	TRUE			rs71941608	down	7832
3153	CARD16	-0.160562	0.383881	-4.60804	1.70755e-05	0.00302209	1.40159	0.46966	0.309098	-0.160562	11	104916075	R	II	CARD16	TSS200	opensea	TSS200-opensea		#N/A	#N/A				down	114769
3179	CASP1	-0.14886	0.3764	-4.65625	1.4271e-05	0.00287099	1.57591	0.455928	0.307068	-0.14886	11	104915759	F	II	CASP1	Body	opensea	Body-opensea		#N/A	#N/A				down	834
3188	CASP8	-0.107453	0.17471	-4.53535	2.23433e-05	0.00324627	1.14061	0.232116	0.124664	-0.107453	2	202122832	R	II	CASP8	5'UTR	opensea	5'UTR-opensea		TRUE	TRUE				down	841
3200	CASR	-0.100777	0.324609	-3.9572	0.000175419	0.007493	-0.847347	0.378449	0.277672	-0.100777	3	121964928	R	II	CASR	5'UTR	opensea	5'UTR-opensea		#N/A	#N/A				down	846
3635	CD74	-0.128087	0.510629	-5.03901	3.33463e-06	0.00180548	2.99307	0.579059	0.450972	-0.128087	5	149792840	R	II	CD74	TSS1500	opensea	TSS1500-opensea		#N/A	#N/A				down	972
3824	CDK6	-0.155144	0.392498	-4.73441	1.06494e-05	0.00258298	1.86061	0.475383	0.320239	-0.155144	7	92262970	F	II	CDK6	Body	opensea	Body-opensea		#N/A	TRUE				down	1021
4217	CLIC1	-0.102043	0.502194	-5.33749	1.03863e-06	0.00119869	4.13513	0.55671	0.454667	-0.102043	6	31702632	R	II	CLIC1	Body	opensea	Body-opensea		TRUE	#N/A				down	1192
4746	CREB5	-0.123797	0.201444	-4.72806	1.09068e-05	0.00261712	1.83737	0.267582	0.143785	-0.123797	7	28725676	F	II	CREB5	TSS200	opensea	TSS200-opensea		TRUE	TRUE				down	9586
4992	CUL9	-0.105954	0.46587	-4.46646	2.87732e-05	0.0035305	0.895409	0.522476	0.416522	-0.105954	6	43192225	R	II	CUL9	3'UTR	opensea	3'UTR-opensea		#N/A	#N/A				down	23113
5216	CYTIP	-0.108961	0.552451	-4.38437	3.87963e-05	0.00394448	0.606045	0.610663	0.501703	-0.108961	2	158297684	F	II	CYTIP	Body	opensea	Body-opensea		#N/A	#N/A				down	9595
6282	ELF1	-0.103723	0.564286	-4.3778	3.97316e-05	0.00397764	0.583001	0.6197	0.515977	-0.103723	13	41593519	F	II	ELF1	TSS200	opensea	TSS200-opensea		#N/A	#N/A				down	1997
6379	EMP1	-0.138914	0.305601	-4.26118	6.04408e-05	0.00461933	0.177653	0.379815	0.240901	-0.138914	12	13349724	F	II	EMP1	5'UTR	opensea	5'UTR-opensea		TRUE	#N/A	low-CpG:13240922-13241005	rs76917784		down	2012
7071	FAT1	-0.105012	0.69403	-4.34027	4.55032e-05	0.00416257	0.451846	0.750132	0.64512	-0.105012	4	187629232	R	II	FAT1	Body	opensea	Body-opensea		#N/A	#N/A	low-CpG:187866051-187866401			down	2195
7606	FOXP1	-0.107736	0.596719	-4.76634	9.44307e-06	0.00248065	1.97763	0.654277	0.546541	-0.107736	3	71111923	R	II	FOXP1	Body	shore	Body-shore	chr3:71113896-71114102	#N/A	#N/A				down	27086
8546	GPX4	-0.127494	0.413784	-4.91175	5.43735e-06	0.00210197	2.51563	0.481897	0.354403	-0.127494	19	1102675	F	II	GPX4	TSS1500	shore	TSS1500-shore	chr19:1103722-1105758	TRUE	#N/A				down	2879
9580	HTRA1	-0.110792	0.70946	-5.08251	2.81797e-06	0.00171187	3.15764	0.76865	0.657858	-0.110792	10	124228770	R	I	HTRA1	Body	opensea	Body-opensea		TRUE	TRUE				down	5654
9629	IDO2	-0.153742	0.395061	-4.1981	7.56528e-05	0.00509464	-0.038865	0.477197	0.323455	-0.153742	8	39797497	F	II	IDO2	Body	opensea	Body-opensea		#N/A	#N/A				down	169355
10322	ITPKB	-0.10837	0.307078	-4.48191	2.71913e-05	0.0034617	0.950203	0.364974	0.256605	-0.10837	1	226927327	F	II	ITPKB	TSS1500	shore	TSS1500-shore	chr1:226924560-226926553	#N/A	#N/A				down	3707
10775	KIF3B	-0.110109	0.623994	-5.01708	3.6291e-06	0.00184807	2.91038	0.682819	0.57271	-0.110109	20	30920486	F	II	KIF3B	3'UTR	opensea	3'UTR-opensea		#N/A	TRUE				down	9371
10984	KRT7	-0.108285	0.624149	-4.29098	5.43258e-05	0.00446293	0.280627	0.682	0.573715	-0.108285	12	52638005	R	II	KRT7	Body	shore	Body-shore	chr12:52639195-52639416	TRUE	TRUE				down	3855
11199	LDLRAD3	-0.117442	0.342143	-4.56516	2.00156e-05	0.0031533	1.24735	0.404886	0.287444	-0.117442	11	36171375	R	II	LDLRAD3	Body	opensea	Body-opensea		#N/A	TRUE				down	143458
11321	LIMA1	-0.112248	0.722503	-4.16754	8.42939e-05	0.0053246	-0.143078	0.782471	0.670223	-0.112248	12	50641260	F	II	LIMA1	Body	opensea	Body-opensea		TRUE	TRUE				down	51474
11517	LONRF1	-0.151896	0.49655	-5.14676	2.19533e-06	0.00156286	3.40189	0.5777	0.425804	-0.151896	8	12584192	R	II	LONRF1	Body	opensea	Body-opensea		#N/A	TRUE				down	91694
11667	LRRC20	-0.102029	0.304923	-4.58295	1.87407e-05	0.0030859	1.31123	0.359432	0.257403	-0.102029	10	72091514	F	II	LRRC20	Body	opensea	Body-opensea		TRUE	TRUE				down	55222
12305	MCF2L2	-0.118581	0.159418	-4.47553	2.78335e-05	0.00349135	0.927582	0.22277	0.104189	-0.118581	3	183003859	R	II	MCF2L2	Body	opensea	Body-opensea		TRUE	TRUE				down	23101
12355	ME3	-0.112217	0.520896	-4.51001	2.45272e-05	0.0033411	1.05016	0.580848	0.468631	-0.112217	11	86304288	R	II	ME3	Body	opensea	Body-opensea		TRUE	TRUE				down	10873
13152	MX2	-0.102363	0.456574	-4.18763	7.85128e-05	0.0051725	-0.0746277	0.511261	0.408898	-0.102363	21	42733894	R	II	MX2	TSS200	opensea	TSS200-opensea		TRUE	#N/A				down	4600
13180	MYEOV	-0.117145	0.443099	-4.94186	4.84573e-06	0.00201867	2.62804	0.505683	0.388538	-0.117145	11	69064741	R	II	MYEOV	3'UTR	opensea	3'UTR-opensea		#N/A	TRUE				down	26579
13281	MYO1E	-0.105491	0.668538	-4.98758	4.06574e-06	0.00192373	2.7994	0.724896	0.619405	-0.105491	15	59592763	F	II	MYO1E	Body	opensea	Body-opensea		TRUE	TRUE		rs76180476		down	4643
13404	NAT1	-0.115686	0.49121	-4.94373	4.81107e-06	0.00201867	2.63505	0.553015	0.437329	-0.115686	8	18067770	F	II	NAT1	5'UTR	opensea	5'UTR-opensea		TRUE	TRUE				down	9
13433	NAV2	-0.116216	0.667559	-5.63706	3.14193e-07	0.000713764	5.30962	0.729647	0.613431	-0.116216	11	19463903	F	II	NAV2	Body	opensea	Body-opensea		TRUE	TRUE				down	89797
13764	NFKBIE	-0.109035	0.420702	-5.23441	1.55846e-06	0.00136483	3.73737	0.478954	0.369919	-0.109035	6	44230977	F	II	NFKBIE	Body	shore	Body-shore	chr6:44232880-44233447	TRUE	TRUE				down	4794
14869	PDE4B	-0.131023	0.392616	-5.31204	1.14838e-06	0.00120831	4.03663	0.462615	0.331592	-0.131023	1	66799419	R	II	PDE4B	Body	opensea	Body-opensea		#N/A	TRUE				down	5142
14896	PDGFA	-0.178491	0.478347	-4.67387	1.33625e-05	0.00279643	1.63985	0.573705	0.395214	-0.178491	7	544525	F	I	PDGFA	Body	opensea	Body-opensea		#N/A	#N/A		rs76169668		down	5154
15025	PEX6	-0.10551	0.636548	-5.44322	6.82885e-07	0.001002	4.54663	0.692916	0.587406	-0.10551	6	42939029	F	II	PEX6	Body	opensea	Body-opensea		TRUE	TRUE				down	5190
15226	PIK3IP1	-0.103769	0.373338	-4.52489	2.32209e-05	0.00328696	1.10323	0.428777	0.325008	-0.103769	22	31686466	R	II	PIK3IP1	Body	shore	Body-shore	chr22:31686636-31687371	#N/A	#N/A				down	113791
15255	PIP4K2A	-0.133576	0.651846	-4.11043	0.000103056	0.00584713	-0.336532	0.723209	0.589633	-0.133576	10	22972299	R	II	PIP4K2A	Body	opensea	Body-opensea		#N/A	TRUE				down	5305
15748	PPCDC	-0.122171	0.382976	-6.14093	4.01275e-08	0.000285376	7.33853	0.448245	0.326074	-0.122171	15	75339541	F	II	PPCDC	Body	opensea	Body-opensea		TRUE	TRUE		rs78664321		down	60490
15840	PPP1R9B	-0.107146	0.320319	-4.46615	2.88054e-05	0.0035305	0.894325	0.377561	0.270415	-0.107146	17	48227139	F	I	PPP1R9B	1stExon	island	1stExon-island	chr17:48226223-48228625	#N/A	#N/A				down	84687
16052	PRKCE	-0.107447	0.515451	-5.66698	2.7848e-07	0.000683736	5.42833	0.572854	0.465407	-0.107447	2	46088325	R	II	PRKCE	Body	opensea	Body-opensea		#N/A	TRUE				down	5581
16056	PRKCH	-0.133885	0.281991	-5.61273	3.46522e-07	0.000736218	5.21328	0.353519	0.219634	-0.133885	14	61938892	R	II	PRKCH	Body	opensea	Body-opensea		TRUE	TRUE				down	5583
16335	PTK2	-0.100107	0.516467	-4.13228	9.54446e-05	0.00562252	-0.262701	0.569949	0.469842	-0.100107	8	141801307	F	II	PTK2	Body	opensea	Body-opensea		TRUE	TRUE				down	5747
16476	PTTG1IP	-0.124502	0.565312	-4.46143	2.93075e-05	0.00355327	0.877585	0.631827	0.507325	-0.124502	21	46289921	F	II	PTTG1IP	Body	shelf	Body-shelf	chr21:46292709-46294744	TRUE	#N/A		rs2282114		down	754
16617	RAB3IP	-0.146488	0.401498	-4.28463	5.55778e-05	0.00449172	0.258627	0.479759	0.333271	-0.146488	12	70215816	F	II	RAB3IP	3'UTR	opensea	3'UTR-opensea		#N/A	TRUE		rs1000783		down	117177
16638	RAB8B	-0.132678	0.445942	-4.59359	1.80163e-05	0.00306655	1.34951	0.516825	0.384147	-0.132678	15	63504871	F	I	RAB8B	Body	opensea	Body-opensea		#N/A	TRUE				down	51762
16821	RASAL2	-0.103487	0.617303	-5.00976	3.73295e-06	0.00186825	2.88281	0.672591	0.569104	-0.103487	1	178313656	R	II	RASAL2	Body	opensea	Body-opensea		#N/A	TRUE				down	9462
16872	RASSF3	-0.148799	0.238404	-4.25025	6.28454e-05	0.00469441	0.140006	0.3179	0.169101	-0.148799	12	65019329	R	II	RASSF3	Body	opensea	Body-opensea		TRUE	TRUE				down	283349
17048	RELL1	-0.12684	0.57341	-5.36267	9.40162e-07	0.0011716	4.23284	0.641174	0.514334	-0.12684	4	37668528	R	II	RELL1	Body	opensea	Body-opensea		TRUE	#N/A				down	768211
17891	SAMD4A	-0.121166	0.357406	-4.54051	2.19225e-05	0.00323216	1.15905	0.422138	0.300973	-0.121166	14	55119082	F	I	SAMD4A	Body	opensea	Body-opensea		TRUE	TRUE				down	23034
17919	SASH1	-0.10358	0.512551	-4.4703	2.83717e-05	0.00351857	0.909026	0.567888	0.464308	-0.10358	6	148762393	F	II	SASH1	Body	opensea	Body-opensea		TRUE	TRUE				down	23328
18052	SCP2	-0.141495	0.418408	-4.8613	6.59044e-06	0.00220697	2.32805	0.494001	0.352507	-0.141495	1	53480710	F	II	SCP2	1stExon	opensea	1stExon-opensea		#N/A	#N/A		rs7529265		down	6342
18104	SDK1	-0.102811	0.49644	-3.96412	0.000171295	0.00740711	-0.824538	0.551366	0.448555	-0.102811	7	3901843	R	II	SDK1	Body	opensea	Body-opensea		#N/A	TRUE				down	221935
18261	SERPINA12	-0.118415	0.504932	-5.73506	2.11462e-07	0.00061861	5.69932	0.568195	0.44978	-0.118415	14	94984381	F	II	SERPINA12	TSS1500	opensea	TSS1500-opensea		#N/A	TRUE				down	145264
18397	SGK1	-0.101944	0.250407	-4.63076	1.56929e-05	0.0029477	1.48361	0.30487	0.202926	-0.101944	6	134499419	R	II	SGK1	Body	shore	Body-shore	chr6:134497536-134497756	TRUE	#N/A				down	6446
18714	SIPA1	-0.107326	0.397691	-4.48297	2.70855e-05	0.00345903	0.953981	0.45503	0.347703	-0.107326	11	65406254	F	II	SIPA1	5'UTR	shelf	5'UTR-shelf	chr11:65408344-65408631	#N/A	#N/A				down	6494
18794	SLAMF1	-0.107183	0.539687	-4.50402	2.50725e-05	0.00336732	1.02884	0.596949	0.489766	-0.107183	1	160607887	R	II	SLAMF1	Body	opensea	Body-opensea		#N/A	#N/A				down	6504
19188	SLC35F2	-0.104394	0.681464	-5.09202	2.71596e-06	0.00170398	3.1937	0.737237	0.632842	-0.104394	11	107711742	R	II	SLC35F2	Body	opensea	Body-opensea		TRUE	TRUE				down	54733
19344	SLC5A10	-0.105527	0.686283	-4.282	5.61024e-05	0.0045013	0.249555	0.742661	0.637134	-0.105527	17	18854560	R	II	SLC5A10	TSS1500	opensea	TSS1500-opensea		#N/A	#N/A				down	125206
19771	SORCS2	-0.111403	0.737578	-4.63063	1.57003e-05	0.0029477	1.48315	0.797095	0.685692	-0.111403	4	7532607	F	II	SORCS2	Body	opensea	Body-opensea		#N/A	TRUE				down	57537
19836	SPATA13	-0.110481	0.407243	-3.92935	0.000192996	0.00786902	-0.938853	0.466267	0.355786	-0.110481	13	24845891	R	II	SPATA13	Body	opensea	Body-opensea		TRUE	TRUE				down	221178
19979	SPRYD3	-0.109102	0.32778	-6.34994	1.68464e-08	0.000178174	8.19656	0.386067	0.276966	-0.109102	12	53472792	R	II	SPRYD3	Body	shore	Body-shore	chr12:53472814-53473491	#N/A	#N/A				down	84926
20074	SRI	-0.113264	0.509661	-4.53963	2.19933e-05	0.00323563	1.15592	0.570172	0.456908	-0.113264	7	87848292	R	II	SRI	Body	shore	Body-shore	chr7:87849003-87849594	#N/A	#N/A				down	6717
20219	STARD13	-0.119296	0.60341	-4.5968	1.78029e-05	0.0030593	1.36108	0.667144	0.547848	-0.119296	13	33825496	R	II	STARD13	Body	opensea	Body-opensea		TRUE	TRUE				down	90627
20552	SYNPO	-0.118715	0.61492	-5.40665	7.89735e-07	0.00106053	4.40392	0.678343	0.559628	-0.118715	5	150017204	R	II	SYNPO	Body	opensea	Body-opensea		TRUE	TRUE				down	11346
20606	TACC1	-0.101286	0.522983	-4.22524	6.87021e-05	0.00489267	0.0540522	0.577095	0.475809	-0.101286	8	38615330	F	II	TACC1	5'UTR	shore	5'UTR-shore	chr8:38614414-38615236	TRUE	#N/A				down	6867
20648	TAGLN2	-0.140281	0.569519	-5.1026	2.60673e-06	0.00167852	3.23384	0.644464	0.504183	-0.140281	1	159894061	R	II	TAGLN2	5'UTR	shore	5'UTR-shore	chr1:159894329-159895398	#N/A	#N/A				down	8407
21044	TGFA	-0.115145	0.610545	-5.93979	9.18275e-08	0.000402948	6.52135	0.672061	0.556916	-0.115145	2	70751721	F	II	TGFA	Body	opensea	Body-opensea		TRUE	TRUE				down	7039
21053	TGFB2	-0.102508	0.610185	-3.81874	0.000280958	0.00956741	-1.29809	0.664949	0.562441	-0.102508	1	218524558	F	II	TGFB2	Body	opensea	Body-opensea		#N/A	#N/A				down	7042
21167	TIAM1	-0.105353	0.407249	-4.46684	2.87328e-05	0.0035305	0.89677	0.463534	0.358181	-0.105353	21	32931935	R	I	TIAM1	TSS1500	island	TSS1500-island	chr21:32929927-32932017	TRUE	#N/A				down	7074
21444	TMEM63A	-0.126936	0.390173	-6.78883	2.66516e-09	7.32887e-05	10.0232	0.457989	0.331052	-0.126936	1	226065637	R	II	TMEM63A	5'UTR	shelf	5'UTR-shelf	chr1:226069605-226070898	TRUE	#N/A				down	9725
21470	TMEM87B	-0.100738	0.171141	-5.94753	8.89606e-08	0.000400603	6.55263	0.22496	0.124222	-0.100738	2	112814041	R	II	TMEM87B	Body	shore	Body-shore	chr2:112811809-112812134	#N/A	#N/A				down	84910
21574	TNFRSF9	-0.101034	0.275989	-4.08752	0.000111665	0.00606129	-0.413698	0.329966	0.228932	-0.101034	1	8001046	F	II	TNFRSF9	TSS200	shore	TSS200-shore	chr1:8002408-8002699	#N/A	#N/A			rs17848005	down	3604
22108	TSHZ2	-0.107708	0.79524	-5.48074	5.88034e-07	0.000947473	4.69349	0.852783	0.745074	-0.107708	20	51592177	F	II	TSHZ2	Body	shelf	Body-shelf	chr20:51589707-51590020	#N/A	#N/A			rs13039372	down	128553
22135	TSPAN18	-0.10864	0.640938	-4.23532	6.62813e-05	0.00483265	0.0886516	0.698978	0.590338	-0.10864	11	44883965	F	II	TSPAN18	5'UTR	opensea	5'UTR-opensea		#N/A	TRUE				down	90139
22259	TTYH3	-0.121344	0.371572	-5.40433	7.97037e-07	0.00106053	4.39489	0.436399	0.315055	-0.121344	7	2673408	R	II	TTYH3	Body	shore	Body-shore	chr7:2671156-2671937	#N/A	#N/A				down	80727
22282	TUBB	-0.100075	0.526205	-5.55564	4.35825e-07	0.00082843	4.98783	0.57967	0.479595	-0.100075	6	30687221	R	II	TUBB	TSS1500	shore	TSS1500-shore	chr6:30687941-30688213	#N/A	#N/A				down	203068
22380	UBE2Z	-0.160024	0.707748	-5.05653	3.11621e-06	0.0017803	3.05928	0.79324	0.633216	-0.160024	17	46993161	R	II	UBE2Z	Body	opensea	Body-opensea		TRUE	TRUE				down	65264
22891	WDSUB1	-0.153664	0.541568	-5.09886	2.64483e-06	0.00168698	3.21965	0.623662	0.469998	-0.153664	2	160106670	F	II	WDSUB1	Body	opensea	Body-opensea		#N/A	TRUE				down	151525
23195	ZC3H12A	-0.117933	0.270533	-4.43352	3.24502e-05	0.00367399	0.778924	0.333538	0.215605	-0.117933	1	37943106	F	II	ZC3H12A	Body	shelf	Body-shelf	chr1:37939723-37940650	TRUE	TRUE				down	80149
23224	ZC3H4	-0.106025	0.559393	-4.93475	4.97946e-06	0.00203561	2.60147	0.616036	0.510011	-0.106025	19	47614071	R	II	ZC3H4	Body	shore	Body-shore	chr19:47614408-47614661	#N/A	#N/A			rs55798223	down	23211
23317	ZFP1	-0.104958	0.55311	-4.88469	6.02886e-06	0.00216055	2.4149	0.609184	0.504226	-0.104958	16	75183231	R	II	ZFP1	5'UTR	shore	5'UTR-shore	chr16:75182243-75182846	#N/A	#N/A				down	162239
23429	ZNF217	-0.104693	0.573064	-4.28879	5.47538e-05	0.00447303	0.27305	0.628996	0.524303	-0.104693	20	52199778	F	II	ZNF217	TSS200	shore	TSS200-shore	chr20:52198058-52198400	#N/A	#N/A				down	7764
23442	ZNF296	-0.103198	0.394356	-4.34665	4.44675e-05	0.00413532	0.474103	0.449489	0.346291	-0.103198	19	45578863	F	II	ZNF296	Body	shore	Body-shore	chr19:45579321-45580018	#N/A	#N/A	low-CpG:50270703-50270775			down	162979
23461	ZNF365	-0.128481	0.651838	-3.95565	0.000176352	0.00751311	-0.852433	0.720479	0.591998	-0.128481	10	64193068	R	II	ZNF365	Body	opensea	Body-opensea		#N/A	TRUE				down	22891
23552	ZNF609	-0.103483	0.401061	-7.54203	1.07409e-10	2.59407e-05	13.2146	0.456346	0.352863	-0.103483	15	64799784	F	II	ZNF609	Body	opensea	Body-opensea		#N/A	TRUE				down	23060
33	ABCA2	0.115994	0.628756	4.47987	2.73948e-05	0.00347247	0.942977	0.566787	0.682781	0.115994	9	139916869	R	II	ABCA2	Body	shore	Body-shore	chr9:139917178-139917492	#N/A	#N/A				up	20
220	ABR	0.119035	0.779805	4.98782	4.06193e-06	0.00192373	2.80031	0.716211	0.835246	0.119035	17	981643	F	I	ABR	Body	island	Body-island	chr17:981508-981748	#N/A	TRUE				up	29
265	ACACB	0.100315	0.613679	3.87087	0.000235563	0.00870733	-1.12964	0.560086	0.660401	0.100315	12	109684116	R	II	ACACB	Body	opensea	Body-opensea		#N/A	#N/A				up	32
337	ACSF2	0.116507	0.363359	4.28982	5.45527e-05	0.00446999	0.276604	0.301115	0.417622	0.116507	17	48545950	R	I	ACSF2	Body	island	Body-island	chr17:48545570-48546900	#N/A	TRUE				up	80221
362	ACSL5	0.1123	0.516075	4.42731	3.31931e-05	0.00371479	0.757009	0.456079	0.568379	0.1123	10	114134550	R	II	ACSL5	TSS1500	opensea	TSS1500-opensea		#N/A	#N/A			rs72821850	up	51703
408	ACVR2B	0.107023	0.634308	4.76009	9.66848e-06	0.0024992	1.95466	0.577132	0.684155	0.107023	3	38501099	R	II	ACVR2B	Body	shelf	Body-shelf	chr3:38495088-38497151	TRUE	#N/A				up	93
425	ADAM19	0.113333	0.474396	5.30478	1.18173e-06	0.00122612	4.00856	0.413848	0.527181	0.113333	5	156962414	R	II	ADAM19	Body	opensea	Body-opensea		#N/A	TRUE				up	8728
499	ADCY10	0.103344	0.531556	5.45255	6.5798e-07	0.00099722	4.58311	0.476345	0.579689	0.103344	1	167882440	F	II	ADCY10	5'UTR	opensea	5'UTR-opensea		#N/A	TRUE				up	55811
556	ADI1	0.125892	0.478025	4.27007	5.85503e-05	0.00457478	0.208325	0.410768	0.536659	0.125892	2	3521258	R	II	ADI1	Body	shore	Body-shore	chr2:3522270-3523617	#N/A	#N/A				up	55256
677	AGL	0.101747	0.546	4.65667	1.42489e-05	0.00287099	1.57742	0.491642	0.593389	0.101747	1	100335651	R	II	AGL	Body	opensea	Body-opensea		#N/A	TRUE				up	178
760	AHR	0.105635	0.809602	6.95904	1.29542e-09	5.34335e-05	10.7391	0.753167	0.858802	0.105635	7	17379795	F	II	AHR	Body	opensea	Body-opensea		#N/A	#N/A	low-CpG:17346139-17346335	rs72552769		up	196
818	AKAP13	0.121338	0.535039	4.67423	1.33446e-05	0.00279643	1.64116	0.470215	0.591553	0.121338	15	86186011	R	II	AKAP13	Body	opensea	Body-opensea		#N/A	TRUE				up	11214
838	AKR1D1	0.12154	0.608364	4.29297	5.39408e-05	0.00445347	0.287496	0.543431	0.664971	0.12154	7	137761289	R	II	AKR1D1	1stExon	opensea	1stExon-opensea		#N/A	#N/A				up	6718
891	ALDH2	0.170138	0.64322	5.42395	7.37288e-07	0.00103441	4.47138	0.552325	0.722462	0.170138	12	112220997	R	I	ALDH2	Body	opensea	Body-opensea		#N/A	#N/A				up	217
966	ALPL	0.100049	0.43228	4.8753	6.24853e-06	0.00217749	2.38	0.378829	0.478878	0.100049	1	21877322	R	II	ALPL	5'UTR	opensea	5'UTR-opensea		#N/A	#N/A				up	249
1301	APLP2	0.101449	0.635041	4.87935	6.15288e-06	0.00217392	2.39504	0.580842	0.682291	0.101449	11	129984345	F	II	APLP2	Body	opensea	Body-opensea		#N/A	TRUE				up	334
1500	ARHGAP27	0.101022	0.713158	4.72244	1.11396e-05	0.00264344	1.81682	0.659188	0.76021	0.101022	17	43483116	F	I	ARHGAP27	1stExon	island	1stExon-island	chr17:43483097-43483454	TRUE	TRUE				up	201176
1538	ARHGEF10	0.118832	0.552121	4.03297	0.000135033	0.00660101	-0.596294	0.488635	0.607467	0.118832	8	1896553	R	II	ARHGEF10	Body	shelf	Body-shelf	chr8:1893696-1894083	#N/A	#N/A				up	9639
1604	ARHGEF4	0.104694	0.650064	5.35721	9.60708e-07	0.00118291	4.21163	0.594132	0.698825	0.104694	2	131688463	F	II	ARHGEF4	5'UTR	opensea	5'UTR-opensea		#N/A	#N/A				up	50649
1611	ARID1A	0.116982	0.651381	5.71962	2.2511e-07	0.000624373	5.63774	0.588884	0.705866	0.116982	1	27108185	F	II	ARID1A	3'UTR	opensea	3'UTR-opensea		#N/A	TRUE				up	8289
1617	ARID1B	0.104547	0.576339	4.93789	4.91992e-06	0.00202439	2.61321	0.520485	0.625032	0.104547	6	157284510	F	II	ARID1B	Body	opensea	Body-opensea		#N/A	TRUE				up	57492
1649	ARID5B	0.108627	0.540815	6.60421	5.80695e-09	9.98023e-05	9.2511	0.482782	0.591409	0.108627	10	63770415	F	II	ARID5B	Body	opensea	Body-opensea		#N/A	TRUE				up	84159
1656	ARL15	0.11765	0.514973	4.01545	0.000143488	0.00678427	-0.654602	0.452119	0.569769	0.11765	5	53516701	F	II	ARL15	Body	opensea	Body-opensea		#N/A	TRUE				up	54622
1668	ARL4D	0.102309	0.421355	4.45768	2.97119e-05	0.0035677	0.864309	0.366697	0.469006	0.102309	17	41477948	R	II	ARL4D	3'UTR	shore	3'UTR-shore	chr17:41476220-41476715	#N/A	#N/A				up	379
1726	ARSB	0.100281	0.434979	5.18287	1.90686e-06	0.00148528	3.53978	0.381404	0.481685	0.100281	5	78126647	F	II	ARSB	Body	opensea	Body-opensea		#N/A	TRUE				up	411
1763	ASB13	0.116466	0.670398	6.98622	1.15415e-09	5.28962e-05	10.8538	0.608177	0.724643	0.116466	10	5690914	F	II	ASB13	Body	opensea	Body-opensea		#N/A	#N/A		rs61729425		up	79754
1804	ASGR2	0.108811	0.487957	4.03801	0.00013269	0.00654309	-0.579478	0.429825	0.538636	0.108811	17	7019284	R	II	ASGR2	TSS1500	opensea	TSS1500-opensea		#N/A	#N/A				up	433
1827	ASPH	0.109758	0.610631	4.3873	3.83863e-05	0.00393524	0.616326	0.551993	0.661751	0.109758	8	62568172	R	II	ASPH	Body	opensea	Body-opensea		#N/A	TRUE				up	444
1898	ATN1	0.10315	0.619785	4.6791	1.31034e-05	0.00277755	1.65889	0.564677	0.667827	0.10315	12	7033146	F	II	ATN1	TSS1500	shelf	TSS1500-shelf	chr12:7036955-7037924	#N/A	#N/A		rs7310420		up	1822
2174	BAIAP2	0.110044	0.379225	5.13975	2.25611e-06	0.00158536	3.37516	0.320434	0.430479	0.110044	17	79010458	R	I	BAIAP2	Body	shore	Body-shore	chr17:79008929-79009762	#N/A	#N/A		rs61148130		up	10458
2482	BRCA1	0.102517	0.588211	4.65645	1.42605e-05	0.00287099	1.57663	0.533442	0.635959	0.102517	17	41196368	F	II	BRCA1	3'UTR	opensea	3'UTR-opensea		#N/A	#N/A		rs12516		up	672
2496	BRF1	0.106783	0.49515	4.8661	6.47119e-06	0.00220496	2.34585	0.438102	0.544885	0.106783	14	105751711	F	II	BRF1	Body	opensea	Body-opensea		#N/A	#N/A				up	2972
3142	CAPZB	0.112875	0.697805	5.42261	7.4121e-07	0.00103639	4.46617	0.637502	0.750377	0.112875	1	19665505	F	II	CAPZB	3'UTR	shore	3'UTR-shore	chr1:19665010-19665276	#N/A	TRUE		rs14847		up	832
3505	CD14	0.109431	0.502193	5.00454	3.80876e-06	0.00187252	2.86317	0.44373	0.553161	0.109431	5	140014002	F	II	CD14	TSS1500	shore	TSS1500-shore	chr5:140011482-140012739	#N/A	#N/A		rs77590806		up	929
3948	CFL2	0.119117	0.435931	4.35093	4.37852e-05	0.00410654	0.489052	0.372293	0.49141	0.119117	14	35184556	R	II	CFL2	TSS1500	shore	TSS1500-shore	chr14:35183385-35184196	#N/A	#N/A				up	1073
3964	CHCHD5	0.112107	0.645589	4.23259	6.693e-05	0.00484798	0.0792572	0.585696	0.697803	0.112107	2	113346566	R	II	CHCHD5	3'UTR	opensea	3'UTR-opensea		#N/A	#N/A				up	84269
3996	CHERP	0.123985	0.679074	5.8419	1.36986e-07	0.000485067	6.12701	0.612835	0.73682	0.123985	19	16637309	R	II	CHERP	Body	shore	Body-shore	chr19:16635980-16636825	#N/A	#N/A				up	10523
4155	CLDN14	0.101291	0.358686	3.97312	0.00016607	0.00730596	-0.794836	0.304572	0.405862	0.101291	21	37853496	R	II	CLDN14	5'UTR	opensea	5'UTR-opensea		#N/A	#N/A				up	23562
4164	CLDN18	0.100859	0.628049	4.1812	8.03212e-05	0.0052183	-0.09657	0.574165	0.675024	0.100859	3	137728810	F	I	CLDN18	TSS200	shore	TSS200-shore	chr3:137728994-137729206	#N/A	#N/A				up	51208
4363	CNGA1	0.101496	0.454014	5.54236	4.59648e-07	0.000835225	4.93552	0.39979	0.501286	0.101496	4	48015981	F	II	CNGA1	TSS1500	shelf	TSS1500-shelf	chr4:48018490-48019381	#N/A	#N/A				up	1259
4569	COL6A3	0.107235	0.573541	4.2718	5.81886e-05	0.00455613	0.214307	0.516251	0.623486	0.107235	2	238235136	F	II	COL6A3	Body	opensea	Body-opensea		#N/A	TRUE				up	1293
4575	COL8A1	0.105092	0.588889	4.97095	4.33399e-06	0.00196233	2.737	0.532744	0.637836	0.105092	3	99507048	F	II	COL8A1	5'UTR	opensea	5'UTR-opensea		#N/A	TRUE				up	1295
4628	CORO2A	0.112525	0.39943	5.0807	2.83789e-06	0.00171388	3.15075	0.339314	0.451839	0.112525	9	100952835	R	II	CORO2A	5'UTR	shore	5'UTR-shore	chr9:100954286-100954593	#N/A	#N/A				up	7464
4762	CREBBP	0.101974	0.507679	5.89749	1.09177e-07	0.000440631	6.35069	0.4532	0.555174	0.101974	16	3824553	F	II	CREBBP	Body	opensea	Body-opensea		#N/A	TRUE				up	1387
5115	CYP1A1	0.109572	0.249282	4.06923	0.000119026	0.00623359	-0.475069	0.190743	0.300315	0.109572	15	75019188	F	II	CYP1A1	TSS1500	island	TSS1500-island	chr15:75018186-75019336	#N/A	#N/A				up	1543
5124	CYP1A2	0.108829	0.566023	4.38829	3.82494e-05	0.00393276	0.619781	0.507882	0.616711	0.108829	15	75041386	F	II	CYP1A2	5'UTR	opensea	5'UTR-opensea		#N/A	#N/A		rs35198905		up	1544
5130	CYP1B1	0.105249	0.554527	3.96204	0.000172526	0.00743419	-0.831407	0.498298	0.603547	0.105249	2	38300537	R	II	CYP1B1	Body	shore	Body-shore	chr2:38301276-38304518	#N/A	#N/A				up	1545
5150	CYP2C19	0.111969	0.752939	4.17543	8.19747e-05	0.00526721	-0.116202	0.69312	0.805089	0.111969	10	96521152	R	II	CYP2C19	TSS1500	opensea	TSS1500-opensea		#N/A	#N/A				up	1557
5153	CYP2C8	0.101207	0.542735	4.76992	9.31667e-06	0.00246814	1.99075	0.488666	0.589872	0.101207	10	96830102	F	II	CYP2C8	TSS1500	opensea	TSS1500-opensea		#N/A	#N/A		rs7475244		up	1558
5157	CYP2D6	0.110809	0.617724	5.23818	1.53558e-06	0.00136253	3.75186	0.558524	0.669333	0.110809	22	42528123	R	II	CYP2D6	TSS1500	shelf	TSS1500-shelf	chr22:42524731-42525908	#N/A	#N/A				up	1565
5345	DCPS	0.12263	0.581865	5.33205	1.06116e-06	0.00119869	4.11409	0.51635	0.63898	0.12263	11	126203133	R	II	DCPS	Body	opensea	Body-opensea		#N/A	#N/A				up	28960
5357	DCTN1	0.134453	0.526724	6.02252	6.53898e-08	0.00036948	6.85636	0.454893	0.589346	0.134453	2	74592036	F	II	DCTN1	Body	opensea	Body-opensea		#N/A	#N/A				up	1639
5370	DCUN1D4	0.10529	0.514345	4.95897	4.53804e-06	0.00198922	2.69208	0.458094	0.563384	0.10529	4	52718946	R	II	DCUN1D4	Body	opensea	Body-opensea		#N/A	TRUE				up	23142
5689	DLG2	0.106857	0.639168	4.18492	7.92685e-05	0.00519647	-0.0838578	0.58208	0.688937	0.106857	11	83952986	F	II	DLG2	Body	opensea	Body-opensea		#N/A	TRUE				up	1740
5750	DMPK	0.118064	0.529163	5.55102	4.43978e-07	0.000830871	4.96961	0.466087	0.584152	0.118064	19	46275613	R	II	DMPK	Body	shore	Body-shore	chr19:46270699-46275167	#N/A	#N/A				up	1760
6006	DUSP14	0.102603	0.568508	4.12675	9.73181e-05	0.00567315	-0.281409	0.513693	0.616296	0.102603	17	35872723	R	II	DUSP14	Body	island	Body-island	chr17:35872722-35873026	#N/A	#N/A				up	11072
6162	EFHD1	0.145711	0.755528	4.69584	1.23078e-05	0.00272722	1.71981	0.677682	0.823393	0.145711	2	233495279	R	II	EFHD1	Body	shelf	Body-shelf	chr2:233497826-233499727	#N/A	#N/A				up	80303
6165	EFHD2	0.112193	0.719089	4.34242	4.51517e-05	0.0041525	0.459343	0.659151	0.771343	0.112193	1	15756557	R	II	EFHD2	3'UTR	opensea	3'UTR-opensea		TRUE	#N/A				up	79180
6178	EFNB2	0.11078	0.651956	4.07775	0.000115542	0.00616648	-0.446515	0.592772	0.703553	0.11078	13	107183092	R	II	EFNB2	Body	shelf	Body-shelf	chr13:107186468-107189024	#N/A	#N/A				up	1948
6414	ENPP3	0.100342	0.576918	4.88301	6.06775e-06	0.00216645	2.40863	0.523311	0.623652	0.100342	6	131958144	F	II	ENPP3	TSS1500	opensea	TSS1500-opensea		#N/A	#N/A				up	5169
6965	FAM20C	0.121882	0.693386	5.28853	1.25988e-06	0.00125452	3.94578	0.628271	0.750152	0.121882	7	214779	F	II	FAM20C	Body	shelf	Body-shelf	chr7:218309-218951	TRUE	TRUE		rs28636805		up	56975
7027	FARP1	0.107907	0.534905	4.38283	3.90135e-05	0.00395389	0.600645	0.477256	0.585163	0.107907	13	98926570	R	II	FARP1	Body	opensea	Body-opensea		#N/A	TRUE				up	10160
7157	FBXO21	0.106524	0.425267	5.22346	1.62682e-06	0.00139403	3.69532	0.368357	0.474881	0.106524	12	117626777	R	II	FBXO21	Body	shore	Body-shore	chr12:117627650-117628488	#N/A	#N/A				up	23014
7280	FGD6	0.100186	0.403157	4.60223	1.74478e-05	0.00303759	1.38064	0.349632	0.449819	0.100186	12	95477853	F	II	FGD6	Body	opensea	Body-opensea		#N/A	TRUE		rs11107889		up	55785
7328	FGFR3	0.112998	0.651773	4.75063	1.0019e-05	0.00253694	1.91999	0.591404	0.704402	0.112998	4	1810332	F	II	FGFR3	3'UTR	shelf	3'UTR-shelf	chr4:1806488-1806696	#N/A	#N/A		rs2121456		up	2261
7494	FMO5	0.109951	0.671924	5.15082	2.16087e-06	0.00156286	3.41737	0.613183	0.723134	0.109951	1	146695178	F	II	FMO5	Body	opensea	Body-opensea		#N/A	#N/A		rs10900326		up	2330
7759	FXYD6	0.11356	0.537628	4.0764	0.000116088	0.00617461	-0.451044	0.476959	0.590519	0.11356	11	117748132	F	II	FXYD6	TSS1500	shore	TSS1500-shore	chr11:117747102-117747717	#N/A	#N/A		rs3842262		up	53826
7765	FYN	0.104738	0.600528	5.11655	2.46921e-06	0.00164836	3.28686	0.544572	0.64931	0.104738	6	111999442	R	II	FYN	Body	opensea	Body-opensea		#N/A	TRUE				up	2534
7796	GABBR1	0.103941	0.485031	4.00559	0.000148468	0.00690266	-0.687354	0.429501	0.533442	0.103941	6	29589056	F	II	GABBR1	Body	opensea	Body-opensea		#N/A	#N/A				up	2550
7983	GCLC	0.101697	0.635415	4.53695	2.22118e-05	0.00324297	1.14633	0.581084	0.682781	0.101697	6	53407186	R	II	GCLC	Body	shore	Body-shore	chr6:53409120-53410099	#N/A	#N/A				up	2729
8050	GFRA1	0.108872	0.550281	4.15126	8.92763e-05	0.00546307	-0.198383	0.492116	0.600988	0.108872	10	117997745	R	II	GFRA1	Body	opensea	Body-opensea		#N/A	#N/A				up	2674
8214	GMIP	0.110606	0.680021	3.90783	0.000207723	0.00815007	-1.00928	0.62093	0.731536	0.110606	19	19748461	R	I	GMIP	Body	island	Body-island	chr19:19748266-19749131	TRUE	#N/A				up	51291
8356	GOT2	0.101308	0.602531	4.39131	3.78322e-05	0.00391904	0.630392	0.548408	0.649716	0.101308	16	58752165	F	II	GOT2	Body	opensea	Body-opensea		#N/A	#N/A	low-CpG:57309625-57309691	rs75953333		up	2806
8415	GPHN	0.101409	0.443576	5.30974	1.15887e-06	0.00121016	4.02771	0.389399	0.490808	0.101409	14	66980127	F	II	GPHN	Body	shelf	Body-shelf	chr14:66974369-66976235	#N/A	#N/A				up	10243
8443	GPR162	0.107984	0.714674	4.3011	5.23893e-05	0.00439756	0.315683	0.656984	0.764968	0.107984	12	6929671	R	II	GPR162	TSS1500	shelf	TSS1500-shelf	chr12:6933276-6933605	#N/A	#N/A				up	27239
8697	GSDMB	0.126177	0.609901	5.25943	1.41266e-06	0.00130943	3.83361	0.542492	0.668669	0.126177	17	38074149	R	II	GSDMB	TSS1500	opensea	TSS1500-opensea		#N/A	#N/A				up	55876
8753	GUCY2C	0.103143	0.620301	4.86208	6.57101e-06	0.00220697	2.33093	0.565197	0.66834	0.103143	12	14804010	R	II	GUCY2C	Body	opensea	Body-opensea		#N/A	TRUE				up	2984
8857	HDAC4	0.170999	0.676362	6.40986	1.31184e-08	0.000154602	8.44405	0.585007	0.756006	0.170999	2	240280217	R	II	HDAC4	5'UTR	opensea	5'UTR-opensea		#N/A	#N/A				up	9759
8905	HEBP2	0.103976	0.5544	4.66642	1.37393e-05	0.00282594	1.61282	0.498852	0.602827	0.103976	6	138729779	R	II	HEBP2	Body	shelf	Body-shelf	chr6:138724617-138726215	#N/A	#N/A				up	23593
8927	HELZ	0.119384	0.655119	7.41061	1.88669e-10	2.59407e-05	12.654	0.591339	0.710723	0.119384	17	65190638	R	II	HELZ	Body	opensea	Body-opensea		#N/A	TRUE				up	9931
9079	HLA-DOA	0.105331	0.606016	5.01462	3.66364e-06	0.00185421	2.90112	0.549743	0.655074	0.105331	6	32978281	R	II	HLA-DOA	TSS1500	shelf	TSS1500-shelf	chr6:32975684-32975926	#N/A	#N/A				up	3111
9100	HLA-DPB1	0.100827	0.448764	3.95727	0.000175373	0.00749227	-0.847094	0.394898	0.495724	0.100827	6	33048502	R	II	HLA-DPB1	Body	island	Body-island	chr6:33048416-33048814	#N/A	TRUE				up	3115
9260	HOXA3	0.101244	0.410954	4.02513	0.000138754	0.00667991	-0.622396	0.356865	0.458109	0.101244	7	27155234	F	I	HOXA3	5'UTR	island	5'UTR-island	chr7:27154999-27155426	TRUE	#N/A		rs17500591		up	3200
9355	HOXB1	0.103402	0.632002	4.33766	4.59324e-05	0.00417134	0.442773	0.57676	0.680162	0.103402	17	46608268	R	II	HOXB1	5'UTR	island	5'UTR-island	chr17:46607804-46608390	#N/A	TRUE				up	3211
9720	IGF1	0.11642	0.465171	5.10073	2.62577e-06	0.0016818	3.22672	0.402974	0.519395	0.11642	12	102874832	F	II	IGF1	TSS1500	opensea	TSS1500-opensea		#N/A	#N/A		rs5742612		up	3479
9750	IGFALS	0.108166	0.742933	4.35102	4.37721e-05	0.00410654	0.489342	0.685145	0.793311	0.108166	16	1842505	R	I	IGFALS	Body	island	Body-island	chr16:1840623-1842688	#N/A	#N/A				up	3483
10429	KALRN	0.102415	0.8382	4.40119	3.64999e-05	0.00385743	0.665082	0.783485	0.8859	0.102415	3	124356493	F	II	KALRN	Body	opensea	Body-opensea		#N/A	TRUE			rs74453057	up	8997
10444	KANK3	0.100079	0.67716	4.62052	1.63023e-05	0.00296656	1.4466	0.623694	0.723773	0.100079	19	8396681	R	II	KANK3	Body	shore	Body-shore	chr19:8397958-8400461	#N/A	#N/A				up	256949
10658	KCTD7	0.10139	0.512645	4.97205	4.31586e-06	0.00196233	2.7411	0.458477	0.559867	0.10139	7	66105984	R	II	KCTD7	3'UTR	opensea	3'UTR-opensea		#N/A	#N/A				up	154881
10663	KDM1B	0.136698	0.359849	4.3263	4.78516e-05	0.00422833	0.403212	0.286818	0.423517	0.136698	6	18186411	F	II	KDM1B	Body	opensea	Body-opensea		#N/A	TRUE				up	221656
11016	KRTCAP3	0.128807	0.549553	4.98691	4.07617e-06	0.00192373	2.79689	0.480738	0.609545	0.128807	2	27665711	R	II	KRTCAP3	Body	shore	Body-shore	chr2:27664939-27665151	TRUE	#N/A				up	200634
11037	KTN1	0.105118	0.769499	6.1028	4.69734e-08	0.000298205	7.18294	0.71334	0.818459	0.105118	14	56060624	R	II	KTN1	5'UTR	opensea	5'UTR-opensea		#N/A	TRUE				up	3895
11085	LAMP1	0.135961	0.598356	4.5555	2.07429e-05	0.00318415	1.21271	0.52572	0.66168	0.135961	13	113977332	R	I	LAMP1	3'UTR	shore	3'UTR-shore	chr13:113975893-113976139	#N/A	#N/A				up	3916
11484	LOC100272217	0.11461	0.660581	4.66773	1.36722e-05	0.00282259	1.61757	0.59935	0.713961	0.11461	9	133453231	F	II	LOC100272217	Body	shore	Body-shore	chr9:133454629-133455496	#N/A	#N/A				up	100272217
11487	LOC153684	0.10835	0.635379	3.88712	0.000222907	0.00844237	-1.0768	0.577493	0.685843	0.10835	5	43044703	R	II	LOC153684	Body	shore	Body-shore	chr5:43042107-43043477	#N/A	#N/A				up	153684
11571	LPP	0.102435	0.563188	4.82127	7.67234e-06	0.00231784	2.1799	0.508462	0.610897	0.102435	3	188464815	F	II	LPP	Body	opensea	Body-opensea		#N/A	TRUE				up	4026
11733	LRRFIP2	0.112508	0.591168	5.42829	7.24685e-07	0.00102369	4.4883	0.531062	0.643569	0.112508	3	37179823	R	II	LRRFIP2	Body	opensea	Body-opensea		#N/A	TRUE				up	9209
11877	LYNX1	0.107518	0.529769	3.81699	0.000282621	0.00959466	-1.30372	0.472327	0.579846	0.107518	8	143859734	F	II	LYNX1	TSS200	shore	TSS200-shore	chr8:143858279-143859411	#N/A	#N/A				up	66004
11903	LZTFL1	0.124742	0.53191	5.41811	7.54586e-07	0.00104447	4.44861	0.465267	0.590009	0.124742	3	45879990	R	II	LZTFL1	Body	shelf	Body-shelf	chr3:45883221-45883860	#N/A	#N/A				up	54585
12275	MCC	0.106604	0.421708	4.55301	2.09345e-05	0.00318814	1.20379	0.364755	0.471359	0.106604	5	112553445	R	II	MCC	Body	opensea	Body-opensea		#N/A	TRUE				up	4163
12540	MGAT4A	0.104605	0.560262	4.50265	2.51996e-05	0.00336732	1.02394	0.504377	0.608983	0.104605	2	99342986	R	II	MGAT4A	5'UTR	shelf	5'UTR-shelf	chr2:99346882-99348177	#N/A	#N/A				up	11320
12564	MGMT	0.117835	0.577018	4.6278	1.58668e-05	0.00295475	1.4729	0.514065	0.6319	0.117835	10	131505869	F	II	MGMT	Body	opensea	Body-opensea		#N/A	#N/A				up	4255
12604	MIB1	0.113122	0.605971	5.60694	3.54696e-07	0.000742668	5.19035	0.545536	0.658658	0.113122	18	19406021	R	II	MIB1	Body	opensea	Body-opensea		#N/A	#N/A				up	57534
12648	MIR1178	0.102134	0.535545	5.04172	3.29986e-06	0.00180548	3.00331	0.480981	0.583114	0.102134	12	120151679	R	II	MIR1178	TSS200	opensea	TSS200-opensea		#N/A	#N/A				up	100302274
12750	MIR33B	0.108914	0.652079	5.34902	9.92339e-07	0.00119869	4.17985	0.593893	0.702806	0.108914	17	17718525	F	II	MIR33B	TSS1500	shelf	TSS1500-shelf	chr17:17715696-17716219	#N/A	#N/A				up	693120
12811	MKLN1	0.130567	0.659984	5.429	7.22639e-07	0.00102369	4.49108	0.590229	0.720796	0.130567	7	131156554	R	II	MKLN1	Body	opensea	Body-opensea		#N/A	TRUE				up	4289
12889	MOCOS	0.11466	0.557563	4.12475	9.8007e-05	0.00569793	-0.288198	0.496306	0.610967	0.11466	18	33769346	R	II	MOCOS	Body	shore	Body-shore	chr18:33766391-33768145	#N/A	#N/A				up	55034
12934	MPP4	0.116248	0.779111	5.39325	8.32861e-07	0.00108372	4.35174	0.717006	0.833253	0.116248	2	202564914	R	II	MPP4	TSS1500	opensea	TSS1500-opensea		#N/A	TRUE		rs75853327		up	58538
12996	MRPL23	0.133288	0.639661	4.30236	5.21524e-05	0.00439467	0.32006	0.568453	0.70174	0.133288	11	1976432	F	II	MRPL23	Body	shore	Body-shore	chr11:1977523-1977765	#N/A	#N/A				up	6150
13117	MTUS1	0.121597	0.656819	4.53134	2.26762e-05	0.00326987	1.12626	0.591856	0.713453	0.121597	8	17640624	F	II	MTUS1	5'UTR	opensea	5'UTR-opensea		#N/A	TRUE				up	57509
13208	MYH9	0.114747	0.519704	5.47858	5.93139e-07	0.000949143	4.685	0.458401	0.573148	0.114747	22	36681341	R	I	MYH9	Body	opensea	Body-opensea		#N/A	#N/A	low-CpG:35011227-35011289			up	4627
13369	NADK	0.12002	0.642813	5.76449	1.87672e-07	0.000579758	5.81684	0.578693	0.698713	0.12002	1	1689012	F	I	NADK	Body	shelf	Body-shelf	chr1:1691767-1692063	#N/A	#N/A				up	65220
13409	NAT2	0.103068	0.544219	4.44593	3.10138e-05	0.00361664	0.822769	0.489155	0.592223	0.103068	8	18248649	F	II	NAT2	TSS200	shelf	TSS200-shelf	chr8:18244455-18245226	#N/A	#N/A		rs4646246	rs55927170	up	10
13454	NCBP1	0.106988	0.635482	5.682	2.62091e-07	0.000663236	5.48802	0.578323	0.685312	0.106988	9	100398470	F	II	NCBP1	Body	shelf	Body-shelf	chr9:100395340-100396414	#N/A	#N/A			rs58352235	up	4686
13648	NEU4	0.125446	0.560499	3.99954	0.000151606	0.00697619	-0.707422	0.49348	0.618926	0.125446	2	242749925	R	II	NEU4	TSS1500	opensea	TSS1500-opensea		TRUE	TRUE				up	129807
13684	NFATC1	0.127502	0.709946	4.02836	0.00013721	0.00665056	-0.611647	0.641829	0.769331	0.127502	18	77157760	R	II	NFATC1	Body	island	Body-island	chr18:77153292-77160759	#N/A	#N/A			rs77001416	up	4772
13898	NOD2	0.103692	0.705782	4.89492	5.79824e-06	0.00214027	2.45294	0.650385	0.754077	0.103692	16	50753673	F	II	NOD2	Body	opensea	Body-opensea		#N/A	TRUE				up	64127
13907	NOL10	0.112639	0.649402	5.85292	1.30968e-07	0.000485067	6.17128	0.589225	0.701864	0.112639	2	10774704	F	II	NOL10	Body	opensea	Body-opensea		#N/A	TRUE				up	79954
14233	NUDT6	0.1024	0.776486	4.87165	6.33603e-06	0.00218684	2.36644	0.721779	0.824179	0.1024	4	123841683	R	II	NUDT6	5'UTR	shore	5'UTR-shore	chr4:123843362-123843795	#N/A	#N/A				up	11162
14639	PAQR8	0.102974	0.576845	5.59608	3.70517e-07	0.000760355	5.14743	0.521832	0.624806	0.102974	6	52268609	R	II	PAQR8	Body	shore	Body-shore	chr6:52267981-52268199	#N/A	#N/A			rs17852802	up	85315
14730	PC	0.100079	0.542857	4.82735	7.49758e-06	0.00230946	2.20235	0.48939	0.589469	0.100079	11	66643501	R	II	PC	5'UTR	opensea	5'UTR-opensea		#N/A	#N/A				up	5091
14754	PCCA	0.100983	0.452126	4.07167	0.000118021	0.00620776	-0.466915	0.398176	0.499159	0.100983	13	101175948	F	II	PCCA	Body	opensea	Body-opensea		#N/A	#N/A				up	5095
14809	PCOLCE	0.102149	0.484908	4.67775	1.31697e-05	0.00277755	1.65398	0.430335	0.532484	0.102149	7	100200003	F	II	PCOLCE	1stExon	shore	1stExon-shore	chr7:100201614-100203652	#N/A	#N/A	low-CpG:100037899-100037957			up	5118
14925	PDK4	0.137424	0.606686	4.22728	6.82058e-05	0.00487847	0.0610446	0.533268	0.670692	0.137424	7	95222104	F	II	PDK4	Body	shelf	Body-shelf	chr7:95225503-95226194	#N/A	#N/A				up	5166
15000	PER3	0.123087	0.724932	4.95171	4.66623e-06	0.00200514	2.66489	0.659173	0.782261	0.123087	1	7845798	R	II	PER3	Body	shore	Body-shore	chr1:7843915-7845104	#N/A	#N/A				up	8863
15052	PFKP	0.100417	0.721842	3.86298	0.000241952	0.008822	-1.15523	0.668195	0.768612	0.100417	10	3147056	R	II	PFKP	Body	shore	Body-shore	chr10:3148406-3148625	#N/A	#N/A				up	5214
15196	PIGQ	0.108864	0.60605	3.82708	0.000273177	0.00942831	-1.27126	0.54789	0.656754	0.108864	16	633868	R	II	PIGQ	3'UTR	island	3'UTR-island	chr16:633867-634143	TRUE	#N/A				up	9091
15466	PLEKHF2	0.108751	0.483778	5.06452	3.02141e-06	0.00175779	3.08948	0.425678	0.534429	0.108751	8	96167327	F	II	PLEKHF2	3'UTR	opensea	3'UTR-opensea		#N/A	TRUE				up	79666
15812	PPP1R16A	0.108285	0.531762	4.48296	2.70865e-05	0.00345903	0.953946	0.473911	0.582196	0.108285	8	145725402	R	II	PPP1R16A	Body	shore	Body-shore	chr8:145725460-145726707	#N/A	#N/A				up	84988
15880	PRDM10	0.104369	0.62989	5.03729	3.35686e-06	0.00180548	2.98658	0.574132	0.678501	0.104369	11	129869654	R	II	PRDM10	5'UTR	shelf	5'UTR-shelf	chr11:129871690-129873423	#N/A	#N/A				up	56980
15908	PRDM16	0.100262	0.665344	3.98058	0.00016186	0.00721697	-0.77021	0.611779	0.712041	0.100262	1	3155161	R	II	PRDM16	Body	island	Body-island	chr1:3155160-3155361	#N/A	#N/A				up	63976
15987	PRKAB1	0.103093	0.543852	4.60273	1.74156e-05	0.00303759	1.38244	0.488775	0.591868	0.103093	12	120118807	R	II	PRKAB1	3'UTR	opensea	3'UTR-opensea		#N/A	#N/A				up	5564
16237	PSMB7	0.109357	0.580383	5.00128	3.85693e-06	0.00188496	2.8509	0.52196	0.631316	0.109357	9	127171934	R	II	PSMB7	Body	opensea	Body-opensea		#N/A	TRUE				up	5695
16380	PTPN6	0.110093	0.620831	5.15291	2.1434e-06	0.00156286	3.42532	0.562014	0.672107	0.110093	12	7070317	F	II	PTPN6	3'UTR	opensea	3'UTR-opensea		#N/A	#N/A				up	5777
16530	PYY	0.1073	0.653737	4.67258	1.34269e-05	0.00279907	1.63518	0.596412	0.703713	0.1073	17	42079379	R	II	PYY	5'UTR	shelf	5'UTR-shelf	chr17:42082027-42084972	#N/A	#N/A				up	5697
16549	RAB11B	0.102444	0.597433	4.76702	9.41896e-06	0.00248065	1.98012	0.542702	0.645146	0.102444	19	8454161	R	II	RAB11B	TSS1500	shore	TSS1500-shore	chr19:8454831-8455845	#N/A	#N/A				up	9230
16651	RAC3	0.105926	0.689515	4.15027	8.95878e-05	0.00546942	-0.201737	0.632924	0.73885	0.105926	17	79991871	R	II	RAC3	3'UTR	shore	3'UTR-shore	chr17:79987983-79990315	#N/A	#N/A				up	5881
16681	RAI1	0.153854	0.716956	5.28452	1.27993e-06	0.00125864	3.93031	0.63476	0.788614	0.153854	17	17714347	F	I	RAI1	3'UTR	island	3'UTR-island	chr17:17712911-17714456	TRUE	TRUE				up	10743
16903	RBM14	0.105683	0.545059	5.6625	2.83565e-07	0.000687385	5.41052	0.488598	0.594281	0.105683	11	66382978	F	II	RBM14	TSS1500	shore	TSS1500-shore	chr11:66383571-66385047	#N/A	#N/A				up	10432
17023	RDX	0.114616	0.477547	5.13813	2.27037e-06	0.00158726	3.369	0.416313	0.53093	0.114616	11	110163765	R	II	RDX	5'UTR	shelf	5'UTR-shelf	chr11:110166564-110167759	#N/A	#N/A				up	5962
17106	RFTN1	0.105348	0.650201	3.88315	0.000225934	0.00850849	-1.08971	0.593919	0.699267	0.105348	3	16371295	R	II	RFTN1	Body	opensea	Body-opensea		#N/A	TRUE				up	23180
17149	RGMB	0.113605	0.551415	4.98485	4.10865e-06	0.00193463	2.78915	0.490722	0.604327	0.113605	5	98129982	R	II	RGMB	3'UTR	opensea	3'UTR-opensea		#N/A	TRUE				up	285704
17165	RGS12	0.114587	0.649553	4.77024	9.30532e-06	0.00246675	1.99194	0.588336	0.702923	0.114587	4	3409324	F	II	RGS12	Body	opensea	Body-opensea		#N/A	#N/A		rs1730768		up	6002
17426	RNF39	0.121263	0.432907	3.96223	0.000172412	0.0074338	-0.830773	0.368123	0.489385	0.121263	6	30039403	R	I	RNF39	Body	island	Body-island	chr6:30038881-30039477	#N/A	#N/A				up	80352
17474	RORA	0.110496	0.562465	5.09321	2.70345e-06	0.00170247	3.19821	0.503433	0.613929	0.110496	15	60885912	R	II	RORA	Body	shore	Body-shore	chr15:60883298-60885350	#N/A	#N/A				up	6095
17769	RUVBL1	0.109376	0.53561	4.24673	6.36395e-05	0.00472634	0.12789	0.477176	0.586552	0.109376	3	127840983	R	II	RUVBL1	Body	shore	Body-shore	chr3:127842318-127842907	#N/A	#N/A				up	8607
17865	SALL1	0.194308	0.54266	4.79939	8.3351e-06	0.00238424	2.09917	0.438851	0.633159	0.194308	16	51171082	R	I	SALL1	Body	shore	Body-shore	chr16:51168266-51169110	#N/A	#N/A				up	6299
17921	SAV1	0.109276	0.412161	5.05819	3.0963e-06	0.00177445	3.06555	0.353781	0.463057	0.109276	14	51125203	R	II	SAV1	Body	opensea	Body-opensea		#N/A	TRUE				up	60485
18074	SDC2	0.145756	0.644091	5.61037	3.49831e-07	0.000736218	5.20393	0.566221	0.711977	0.145756	8	97523090	F	II	SDC2	Body	opensea	Body-opensea		#N/A	TRUE				up	6383
18338	SETD2	0.103869	0.694967	4.88358	6.05455e-06	0.00216411	2.41075	0.639475	0.743345	0.103869	3	47191823	F	II	SETD2	Body	opensea	Body-opensea		#N/A	TRUE				up	29072
18415	SGMS1	0.105249	0.432984	3.98269	0.000160686	0.0071926	-0.763226	0.376755	0.482004	0.105249	10	52176755	R	II	SGMS1	5'UTR	shore	5'UTR-shore	chr10:52177724-52178182	#N/A	TRUE				up	259230
18493	SH3BP4	0.109811	0.521681	4.18989	7.78864e-05	0.00516174	-0.0669077	0.463015	0.572826	0.109811	2	235914787	R	II	SH3BP4	5'UTR	opensea	5'UTR-opensea		TRUE	TRUE				up	23677
18668	SHROOM3	0.100165	0.558402	5.81436	1.53245e-07	0.000513907	6.01648	0.50489	0.605054	0.100165	4	77669688	R	II	SHROOM3	Body	opensea	Body-opensea		#N/A	TRUE				up	57619
18752	SKAP1	0.126464	0.555512	5.42945	7.21331e-07	0.00102369	4.49286	0.487949	0.614413	0.126464	17	46239623	F	II	SKAP1	Body	opensea	Body-opensea		#N/A	TRUE				up	8631
18897	SLC17A2	0.10215	0.550322	5.09922	2.64118e-06	0.00168698	3.221	0.495748	0.597899	0.10215	6	25931205	R	II	SLC17A2	TSS1500	opensea	TSS1500-opensea		#N/A	#N/A			rs72542434	up	10246
19139	SLC2A4RG	0.109483	0.527076	4.02661	0.000138047	0.00666603	-0.617491	0.468586	0.578068	0.109483	20	62375208	R	I	SLC2A4RG	3'UTR	shore	3'UTR-shore	chr20:62374061-62374353	#N/A	#N/A				up	56731
19453	SLCO1B3	0.106659	0.794012	5.41972	7.49776e-07	0.00104131	4.45489	0.73703	0.843689	0.106659	12	20966524	R	II	SLCO1B3	5'UTR	opensea	5'UTR-opensea		#N/A	#N/A				up	28234
19658	SNORD56B	0.103122	0.526796	4.93898	4.8995e-06	0.00202095	2.61727	0.471704	0.574825	0.103122	14	71863756	F	II	SNORD56B	TSS1500	opensea	TSS1500-opensea		#N/A	#N/A				up	319139
19661	SNORD57	0.105397	0.430826	4.10212	0.000106103	0.00592065	-0.364561	0.374518	0.479915	0.105397	20	2637211	R	I	SNORD57	TSS1500	shelf	TSS1500-shelf	chr20:2632678-2633690	#N/A	#N/A				up	26792
19725	SOD1	0.110922	0.576937	3.95811	0.000174871	0.00748168	-0.844347	0.517677	0.628599	0.110922	21	33034963	F	II	SOD1	Body	shelf	Body-shelf	chr21:33031734-33032657	#N/A	#N/A				up	6647
19893	SPHK2	0.109627	0.771136	5.57926	3.96422e-07	0.000780175	5.08099	0.712568	0.822195	0.109627	19	49133598	F	II	SPHK2	3'UTR	island	3'UTR-island	chr19:49132603-49134291	#N/A	#N/A				up	56848
20175	ST6GALNAC6	0.1426	0.552796	5.14168	2.23924e-06	0.00157618	3.38251	0.476612	0.619212	0.1426	9	130659142	F	II	ST6GALNAC6	Body	shore	Body-shore	chr9:130661107-130662047	#N/A	#N/A		rs59314952		up	30815
20355	STK40	0.1157	0.502662	4.40875	3.55111e-05	0.00382051	0.691663	0.44085	0.55655	0.1157	1	36849024	F	II	STK40	5'UTR	shelf	5'UTR-shelf	chr1:36851089-36851873	#N/A	#N/A				up	83931
20394	STX11	0.115903	0.655998	4.11346	0.000101967	0.00581927	-0.326315	0.594077	0.709981	0.115903	6	144508571	F	II	STX11	Body	island	Body-island	chr6:144507826-144508697	#N/A	#N/A		rs9496891		up	8676
20448	SULT2A1	0.101733	0.61545	4.71741	1.13519e-05	0.00265368	1.79845	0.5611	0.662833	0.101733	19	48390114	R	II	SULT2A1	TSS1500	opensea	TSS1500-opensea		#N/A	#N/A				up	6822
20670	TAOK1	0.115324	0.792098	5.44148	6.87636e-07	0.001002	4.53982	0.730487	0.84581	0.115324	17	27870753	F	II	TAOK1	3'UTR	opensea	3'UTR-opensea		#N/A	#N/A		rs80278783	rs76598043	up	57551
20673	TAOK3	0.117497	0.630829	6.55463	7.15238e-09	0.000112225	9.04464	0.568057	0.685554	0.117497	12	118588556	R	II	TAOK3	3'UTR	opensea	3'UTR-opensea		#N/A	#N/A				up	51347
20705	TATDN1	0.110893	0.456173	5.44785	6.70419e-07	0.00099722	4.56472	0.396929	0.507822	0.110893	8	125538941	R	II	TATDN1	Body	opensea	Body-opensea		#N/A	TRUE				up	83940
20731	TBC1D14	0.102686	0.663289	4.07655	0.000116026	0.00617447	-0.450527	0.608429	0.711115	0.102686	4	6986609	R	II	TBC1D14	Body	shore	Body-shore	chr4:6988305-6989373	#N/A	#N/A				up	57533
20775	TBC1D8	0.110306	0.664378	6.01905	6.63276e-08	0.000369715	6.84231	0.605447	0.715753	0.110306	2	101666894	R	II	TBC1D8	Body	opensea	Body-opensea		#N/A	#N/A				up	11138
21021	TFPI	0.123563	0.619813	6.9128	1.57638e-09	5.41856e-05	10.5443	0.5538	0.677363	0.123563	2	188419933	R	II	TFPI	TSS1500	opensea	TSS1500-opensea		#N/A	#N/A				up	7035
21031	TFR2	0.116238	0.339908	4.83469	7.2917e-06	0.0022907	2.22948	0.277809	0.394046	0.116238	7	100224437	F	I	TFR2	Body	island	Body-island	chr7:100224270-100224558	#N/A	TRUE				up	7036
21119	THOP1	0.115341	0.819515	3.85006	0.000252771	0.00903337	-1.19706	0.757895	0.873236	0.115341	19	2811736	R	II	THOP1	Body	island	Body-island	chr19:2811638-2811868	TRUE	#N/A				up	7064
21128	THRA	0.10214	0.655891	4.68422	1.28549e-05	0.00276311	1.67751	0.601323	0.703463	0.10214	17	38248105	F	II	THRA	Body	shore	Body-shore	chr17:38249260-38249603	#N/A	TRUE				up	7067
21170	TIAM2	0.105141	0.488153	3.90822	0.000207445	0.00814596	-1.008	0.431982	0.537122	0.105141	6	155537930	R	II	TIAM2	Body	shelf	Body-shelf	chr6:155539975-155540193	#N/A	TRUE				up	26230
21223	TLE2	0.108093	0.704775	5.19782	1.79859e-06	0.00143509	3.59701	0.647027	0.75512	0.108093	19	3032739	F	II	TLE2	Body	shelf	Body-shelf	chr19:3035638-3035872	#N/A	#N/A				up	7089
21383	TMEM176B	0.107076	0.558599	4.43424	3.23652e-05	0.00367053	0.781465	0.501394	0.60847	0.107076	7	150495881	R	II	TMEM176B	5'UTR	shore	5'UTR-shore	chr7:150496809-150498206	#N/A	#N/A				up	28959
21403	TMEM192	0.101686	0.488478	5.08672	2.77239e-06	0.0017075	3.17358	0.434153	0.535838	0.101686	4	166000605	R	II	TMEM192	3'UTR	opensea	3'UTR-opensea		#N/A	#N/A				up	201931
21573	TNFRSF8	0.104365	0.555528	5.06541	3.01099e-06	0.00175421	3.09286	0.499771	0.604136	0.104365	1	12189847	R	II	TNFRSF8	5'UTR	opensea	5'UTR-opensea		#N/A	#N/A				up	943
21728	TOP3B	0.103142	0.760048	6.60665	5.74757e-09	9.98023e-05	9.26129	0.704945	0.808087	0.103142	22	22334553	F	II	TOP3B	5'UTR	shelf	5'UTR-shelf	chr22:22336948-22337333	#N/A	#N/A		rs78145489		up	8940
21765	TPCN2	0.103783	0.653708	3.97821	0.000163187	0.00724481	-0.778041	0.598262	0.702045	0.103783	11	68819068	R	II	TPCN2	Body	shelf	Body-shelf	chr11:68816341-68816951	#N/A	TRUE				up	219931
22092	TSC2	0.112809	0.60987	5.03752	3.3539e-06	0.00180548	2.98744	0.549602	0.662411	0.112809	16	2132527	F	I	TSC2	Body	shore	Body-shore	chr16:2134259-2134632	#N/A	TRUE		rs45517315		up	7249
22110	TSKU	0.11782	0.669946	4.96471	4.43915e-06	0.00197546	2.71359	0.607001	0.724822	0.11782	11	76506902	F	II	TSKU	Body	shelf	Body-shelf	chr11:76510286-76510650	#N/A	#N/A				up	25987
22145	TSPAN5	0.122947	0.620019	4.06379	0.000121306	0.00628285	-0.493308	0.554335	0.677282	0.122947	4	99402843	F	II	TSPAN5	Body	opensea	Body-opensea		#N/A	TRUE		rs75946967		up	10098
22156	TSPAN9	0.102298	0.501197	4.27777	5.69583e-05	0.00452578	0.234938	0.446545	0.548843	0.102298	12	3240109	R	II	TSPAN9	5'UTR	opensea	5'UTR-opensea		#N/A	#N/A				up	10867
22197	TTC36	0.108199	0.430007	5.02619	3.50376e-06	0.00181786	2.94472	0.372202	0.480401	0.108199	11	118397413	F	II	TTC36	TSS1500	shelf	TSS1500-shelf	chr11:118401235-118402069	#N/A	#N/A				up	143941
22717	VPS13D	0.112475	0.271074	4.00298	0.000149814	0.00694174	-0.696012	0.210985	0.32346	0.112475	1	12556568	R	II	VPS13D	Body	opensea	Body-opensea		#N/A	#N/A				up	55187
22824	WASL	0.100917	0.562705	4.93149	5.04201e-06	0.0020475	2.58929	0.50879	0.609707	0.100917	7	123364675	R	II	WASL	Body	opensea	Body-opensea		#N/A	TRUE				up	8976
22833	WDFY3	0.106796	0.643723	4.30263	5.21023e-05	0.00439403	0.320988	0.586668	0.693464	0.106796	4	85818877	R	II	WDFY3	5'UTR	opensea	5'UTR-opensea		#N/A	#N/A				up	23001
23150	ZBTB20	0.100282	0.380139	3.91016	0.000206078	0.00812625	-1.00167	0.326564	0.426846	0.100282	3	114378420	F	II	ZBTB20	5'UTR	opensea	5'UTR-opensea		#N/A	TRUE				up	26137
23354	ZFYVE21	0.11155	0.798857	4.73427	1.06553e-05	0.00258298	1.86007	0.739261	0.850812	0.11155	14	104195301	R	II	ZFYVE21	Body	shore	Body-shore	chr14:104193901-104194627	#N/A	#N/A				up	79038
23597	ZNF775	0.116826	0.709625	4.10405	0.000105388	0.00590213	-0.358061	0.647211	0.764037	0.116826	7	150080842	F	II	ZNF775	5'UTR	shelf	5'UTR-shelf	chr7:150075939-150076856	TRUE	TRUE				up	285971
23639	ZNRF3	0.102674	0.55202	4.55614	2.06936e-05	0.00318399	1.21502	0.497167	0.599841	0.102674	22	29281173	R	II	ZNRF3	5'UTR	shore	5'UTR-shore	chr22:29279412-29280287	#N/A	#N/A				up	84133
23645	ZRANB1	0.107621	0.583939	5.43259	7.12377e-07	0.00102012	4.50512	0.526443	0.634064	0.107621	10	126630735	R	II	ZRANB1	1stExon	opensea	1stExon-opensea		#N/A	#N/A				up	54764
23656	ZSWIM6	0.111425	0.655681	4.13225	9.54569e-05	0.00562252	-0.262825	0.596153	0.707578	0.111425	5	60776693	R	II	ZSWIM6	Body	opensea	Body-opensea		#N/A	#N/A				up	57688

## Sheet: NAFL vs NASH
	symbol	logFC	AveExpr	t	P.Value	adj.P.Val	B	NAFL_AVG	NASH_AVG	deltaBeta	CHR	MAPINFO	Strand	Type	gene	feature	cgi	feat.cgi	UCSC_CpG_Islands_Name	DHS	Enhancer	Phantom	Probe_SNPs	Probe_SNPs_10	g	ENTREZID
264	ABHD3	-0.111443	0.484628	-5.46758	4.6729e-07	6.30515e-05	4.83954	0.53637	0.424927	-0.111443	18	19283268	R	II	ABHD3	Body	shore	Body-shore	chr18:19284165-19285052	#N/A	#N/A				down	171586
541	ACOT11	-0.100966	0.544413	-4.17302	7.34538e-05	0.00134995	-0.0780615	0.59129	0.490324	-0.100966	1	55013419	R	I	ACOT11	TSS1500	opensea	TSS1500-opensea		TRUE	#N/A				down	26027
663	ACSS1	-0.112138	0.523904	-5.26548	1.07335e-06	9.66252e-05	4.0251	0.575968	0.46383	-0.112138	20	25039314	R	II	ACSS1	1stExon	shore	1stExon-shore	chr20:25037707-25039211	#N/A	#N/A				down	84532
1534	AHNAK	-0.10343	0.287181	-5.18425	1.49359e-06	0.000116286	3.70203	0.335202	0.231772	-0.10343	11	62306861	F	II	AHNAK	5'UTR	opensea	5'UTR-opensea		TRUE	TRUE				down	79026
1695	AKAP6	-0.132389	0.54722	-6.12426	2.88326e-08	1.8729e-05	7.57882	0.608686	0.476297	-0.132389	14	32941841	F	II	AKAP6	Body	opensea	Body-opensea		#N/A	TRUE				down	9472
2047	AMOTL2	-0.102961	0.365894	-4.54317	1.85664e-05	0.000524642	1.24936	0.413697	0.310736	-0.102961	3	134083286	R	II	AMOTL2	Body	shore	Body-shore	chr3:134082860-134083201	#N/A	TRUE				down	51421
2363	ANO1	-0.108745	0.22662	-4.54115	1.87096e-05	0.000527141	1.24192	0.277109	0.168363	-0.108745	11	69925136	F	II	ANO1	Body	island	Body-island	chr11:69924338-69925197	TRUE	TRUE				down	55107
2382	ANO6	-0.133952	0.489655	-5.35894	7.31913e-07	7.94631e-05	4.39986	0.551847	0.417895	-0.133952	12	45626938	F	II	ANO6	Body	opensea	Body-opensea		TRUE	TRUE				down	196527
2440	ANXA2	-0.155547	0.515903	-5.44992	5.02791e-07	6.54228e-05	4.76776	0.588122	0.432575	-0.155547	15	60689285	F	II	ANXA2	5'UTR	shore	5'UTR-shore	chr15:60689749-60690430	#N/A	#N/A				down	302
2462	ANXA6	-0.105607	0.612063	-6.08045	3.4842e-08	1.99884e-05	7.39217	0.661094	0.555488	-0.105607	5	150521257	F	II	ANXA6	Body	opensea	Body-opensea		#N/A	TRUE				down	309
2615	APC	-0.101347	0.241207	-3.83575	0.000242611	0.00320125	-1.22258	0.288261	0.186914	-0.101347	5	112073406	R	I	APC	TSS200	opensea	TSS200-opensea		TRUE	#N/A			rs77733015	down	324
2720	APOBEC3D	-0.106189	0.512144	-5.13308	1.8369e-06	0.000129939	3.49988	0.561446	0.455257	-0.106189	22	39417451	R	II	APOBEC3D	1stExon	opensea	1stExon-opensea		#N/A	TRUE				down	140564
2765	APOL2	-0.112649	0.598159	-5.08707	2.21078e-06	0.000143879	3.31896	0.65046	0.537811	-0.112649	22	36636055	R	II	APOL2	TSS200	opensea	TSS200-opensea		#N/A	#N/A				down	23780
2800	AQP1	-0.100436	0.65362	-5.16001	1.64756e-06	0.000122625	3.60615	0.700251	0.599815	-0.100436	7	30951392	R	II	AQP1	TSS200	opensea	TSS200-opensea		#N/A	#N/A				down	358
2864	ARF6	-0.109853	0.417279	-6.13508	2.75125e-08	1.81795e-05	7.62503	0.468282	0.358429	-0.109853	14	50362354	F	II	ARF6	3'UTR	shore	3'UTR-shore	chr14:50359340-50360797	#N/A	#N/A		rs75618848		down	382
2879	ARFRP1	-0.120233	0.743615	-5.63294	2.34377e-07	4.56233e-05	5.51662	0.799438	0.679204	-0.120233	20	62330618	F	II	ARFRP1	3'UTR	shelf	3'UTR-shelf	chr20:62328013-62328558	#N/A	TRUE				down	10139
2899	ARHGAP12	-0.11606	0.300442	-4.09103	9.87369e-05	0.00166561	-0.362255	0.354327	0.238267	-0.11606	10	32218901	R	II	ARHGAP12	TSS1500	shore	TSS1500-shore	chr10:32216901-32217102	#N/A	#N/A				down	94134
2910	ARHGAP18	-0.122963	0.60917	-5.69118	1.83454e-07	4.07932e-05	5.75724	0.66626	0.543297	-0.122963	6	130005350	F	II	ARHGAP18	Body	opensea	Body-opensea		TRUE	#N/A				down	93663
2914	ARHGAP21	-0.124487	0.617529	-5.62219	2.45191e-07	4.64084e-05	5.47232	0.675327	0.550839	-0.124487	10	24995583	F	II	ARHGAP21	Body	opensea	Body-opensea		TRUE	TRUE				down	57584
3102	ARHGEF12	-0.198986	0.433014	-5.86868	8.64441e-08	2.86628e-05	6.49717	0.5254	0.326414	-0.198986	11	120302922	F	II	ARHGEF12	Body	opensea	Body-opensea		TRUE	TRUE				down	23365
3153	ARHGEF2	-0.136105	0.516984	-5.85701	9.08494e-08	2.92179e-05	6.44826	0.580176	0.44407	-0.136105	1	155948698	F	II	ARHGEF2	TSS1500	shore	TSS1500-shore	chr1:155947678-155948490	TRUE	#N/A				down	9181
3169	ARHGEF3	-0.125453	0.475601	-4.88873	4.86956e-06	0.000227732	2.54909	0.533847	0.408394	-0.125453	3	56818298	F	II	ARHGEF3	Body	opensea	Body-opensea		#N/A	TRUE				down	50650
3276	ARL3	-0.154338	0.578774	-7.05742	4.65769e-10	5.05582e-06	11.6594	0.650431	0.496093	-0.154338	10	104436140	F	II	ARL3	3'UTR	opensea	3'UTR-opensea		TRUE	TRUE				down	403
3281	ARL4C	-0.125536	0.744254	-5.29712	9.43188e-07	9.06025e-05	4.15159	0.802539	0.677002	-0.125536	2	235403141	R	II	ARL4C	3'UTR	shore	3'UTR-shore	chr2:235404502-235406541	#N/A	#N/A				down	10123
3300	ARL6IP5	-0.12997	0.362998	-5.13866	1.79603e-06	0.000128093	3.52185	0.423341	0.293372	-0.12997	3	69133862	R	II	ARL6IP5	TSS1500	shore	TSS1500-shore	chr3:69134086-69134479	#N/A	#N/A				down	10550
3310	ARMC2	-0.115143	0.482571	-4.27737	5.01716e-05	0.00103257	0.288914	0.53603	0.420887	-0.115143	6	109266451	R	II	ARMC2	Body	opensea	Body-opensea		#N/A	TRUE				down	84071
3370	ARRDC2	-0.139273	0.710134	-4.31401	4.38303e-05	0.000939129	0.41918	0.774796	0.635523	-0.139273	19	18120614	R	II	ARRDC2	Body	island	Body-island	chr19:18120613-18120840	#N/A	#N/A				down	27106
3724	ATM	-0.151275	0.578342	-5.63384	2.33493e-07	4.55802e-05	5.52033	0.648577	0.497302	-0.151275	11	108092087	R	II	ATM	TSS1500	shore	TSS1500-shore	chr11:108093211-108093969	#N/A	#N/A				down	472
3819	ATP11B	-0.138962	0.573367	-4.78761	7.24087e-06	0.00028855	2.16309	0.637885	0.498923	-0.138962	3	182513355	F	II	ATP11B	Body	shore	Body-shore	chr3:182510866-182512282	#N/A	#N/A				down	23200
3880	ATP2B4	-0.104878	0.508791	-5.72721	1.57578e-07	3.77952e-05	5.90666	0.557484	0.452607	-0.104878	1	203598954	R	II	ATP2B4	5'UTR	shore	5'UTR-shore	chr1:203598471-203598853	#N/A	#N/A				down	493
3906	ATP6V0A1	-0.146714	0.486222	-5.01138	2.99355e-06	0.000171079	3.02321	0.554339	0.407625	-0.146714	17	40609380	R	II	ATP6V0A1	TSS1500	shore	TSS1500-shore	chr17:40610746-40611032	#N/A	#N/A				down	535
3977	ATP9A	-0.100106	0.710163	-5.39602	6.28254e-07	7.31917e-05	4.54945	0.756641	0.656535	-0.100106	20	50312386	F	II	ATP9A	Body	opensea	Body-opensea		TRUE	#N/A				down	10079
3992	ATXN1	-0.13844	0.596341	-4.90626	4.54403e-06	0.000219091	2.61646	0.660617	0.522177	-0.13844	6	16320488	F	II	ATXN1	Body	opensea	Body-opensea		TRUE	TRUE				down	6310
4163	B3GALT5	-0.110383	0.416078	-3.67588	0.000418534	0.00480863	-1.74159	0.467327	0.356944	-0.110383	21	41032396	R	II	B3GALT5	5'UTR	opensea	5'UTR-opensea		TRUE	TRUE				down	10317
4269	BACH2	-0.102514	0.782662	-6.53321	4.82325e-09	1.01431e-05	9.34453	0.830258	0.727744	-0.102514	6	90778227	R	II	BACH2	5'UTR	opensea	5'UTR-opensea		#N/A	TRUE				down	60468
4300	BAHCC1	-0.126997	0.56103	-4.34447	3.91555e-05	0.000866825	0.527982	0.619994	0.492996	-0.126997	17	79372254	R	I	BAHCC1	TSS1500	island	TSS1500-island	chr17:79366806-79374742	#N/A	#N/A				down	57597
4409	BBC3	-0.116217	0.384695	-5.07066	2.36139e-06	0.00014904	3.25464	0.438653	0.322436	-0.116217	19	47735960	R	II	BBC3	1stExon	shore	1stExon-shore	chr19:47733884-47734806	TRUE	#N/A				down	27113
4447	BCAR3	-0.101342	0.792633	-5.105	2.05703e-06	0.000138317	3.38934	0.839685	0.738343	-0.101342	1	94081080	F	II	BCAR3	Body	opensea	Body-opensea		#N/A	TRUE				down	8412
4517	BCL2	-0.128727	0.230356	-4.95364	3.7668e-06	0.000195734	2.79921	0.290122	0.161395	-0.128727	18	60986115	R	II	BCL2	5'UTR	shore	5'UTR-shore	chr18:60986621-60988286	#N/A	#N/A				down	596
4732	BICC1	-0.126957	0.672487	-4.35717	3.73517e-05	0.000838515	0.573497	0.731432	0.604475	-0.126957	10	60456715	F	II	BICC1	Body	opensea	Body-opensea		#N/A	TRUE				down	80114
4936	BPGM	-0.12838	0.456301	-5.31525	8.75685e-07	8.73738e-05	4.22427	0.515906	0.387525	-0.12838	7	134354803	R	II	BPGM	Body	opensea	Body-opensea		#N/A	TRUE				down	669
4977	BRD3	-0.119408	0.392075	-5.91681	7.03845e-08	2.61082e-05	6.69947	0.447514	0.328106	-0.119408	9	136930919	R	II	BRD3	5'UTR	opensea	5'UTR-opensea		#N/A	#N/A				down	8019
5056	BST1	-0.103334	0.335826	-4.41779	2.97934e-05	0.000717284	0.791845	0.383803	0.280469	-0.103334	4	15704680	R	I	BST1	1stExon	island	1stExon-island	chr4:15704640-15705000	TRUE	#N/A				down	683
5132	BTG2	-0.125519	0.34452	-5.57565	2.97957e-07	5.07642e-05	5.28098	0.402797	0.277278	-0.125519	1	203275927	R	II	BTG2	Body	shore	Body-shore	chr1:203274305-203275338	#N/A	TRUE			rs71941608	down	7832
5412	C1orf198	-0.103888	0.678684	-4.46594	2.48657e-05	0.000635007	0.966628	0.726918	0.62303	-0.103888	1	230985709	R	II	C1orf198	Body	opensea	Body-opensea		TRUE	TRUE				down	84886
5725	C6orf223	-0.151215	0.4833	-4.95824	3.69855e-06	0.000193651	2.81703	0.553507	0.402291	-0.151215	6	43970921	F	II	C6orf223	3'UTR	island	3'UTR-island	chr6:43970073-43970922	TRUE	#N/A				down	221416
5892	CAB39L	-0.102895	0.49552	-3.96982	0.000151946	0.00227371	-0.775449	0.543292	0.440397	-0.102895	13	49888180	F	II	CAB39L	Body	opensea	Body-opensea		TRUE	TRUE				down	81617
6426	CAPN2	-0.104087	0.289365	-3.86142	0.000221982	0.00299697	-1.13779	0.337691	0.233604	-0.104087	1	223900822	F	II	CAPN2	Body	island	Body-island	chr1:223899990-223900823	#N/A	#N/A				down	824
6488	CARD16	-0.172873	0.401709	-4.58211	1.60075e-05	0.000476309	1.39302	0.481972	0.309098	-0.172873	11	104916075	R	II	CARD16	TSS200	opensea	TSS200-opensea		#N/A	#N/A				down	114769
6530	CASP1	-0.156194	0.390743	-4.4575	2.56686e-05	0.000647376	0.935893	0.463262	0.307068	-0.156194	11	104915759	F	II	CASP1	Body	opensea	Body-opensea		#N/A	#N/A				down	834
6544	CASP8	-0.107458	0.381985	-6.515	5.22678e-09	1.03705e-05	9.26509	0.431876	0.324418	-0.107458	2	202122372	R	II	CASP8	5'UTR	opensea	5'UTR-opensea		TRUE	#N/A				down	841
6562	CASR	-0.118172	0.340979	-4.56814	1.68835e-05	0.000493403	1.3414	0.395844	0.277672	-0.118172	3	121964928	R	II	CASR	5'UTR	opensea	5'UTR-opensea		#N/A	#N/A				down	846
6735	CC2D2A	-0.12	0.390633	-5.14841	1.72669e-06	0.000125838	3.56031	0.446347	0.326347	-0.12	4	15471377	R	II	CC2D2A	TSS200	opensea	TSS200-opensea		#N/A	TRUE				down	57545
6748	CCDC102A	-0.115971	0.608576	-4.29742	4.65996e-05	0.000980436	0.360105	0.66242	0.546449	-0.115971	16	57571099	R	II	CCDC102A	TSS1500	shore	TSS1500-shore	chr16:57569848-57570844	#N/A	#N/A			rs4784819	down	92922
6814	CCDC146	-0.133887	0.58229	-4.86151	5.42045e-06	0.000242209	2.44476	0.644452	0.510564	-0.133887	7	76829168	R	II	CCDC146	Body	opensea	Body-opensea		#N/A	TRUE				down	57639
6851	CCDC33	-0.105025	0.652095	-4.45005	2.63982e-05	0.000659964	0.908796	0.700856	0.595831	-0.105025	15	74528565	F	II	CCDC33	TSS200	opensea	TSS200-opensea		#N/A	#N/A				down	80125
6865	CCDC40	-0.105205	0.397161	-3.89071	0.000200491	0.00278092	-1.04056	0.446007	0.340801	-0.105205	17	78043031	R	II	CCDC40	Body	shelf	Body-shelf	chr17:78039291-78039547	TRUE	#N/A				down	55036
7232	CD164	-0.112276	0.479228	-4.61045	1.43635e-05	0.000444929	1.49806	0.531356	0.41908	-0.112276	6	109701201	R	II	CD164	Body	shore	Body-shore	chr6:109702898-109704093	#N/A	#N/A				down	8763
7432	CD6	-0.102203	0.657703	-4.18804	6.9553e-05	0.00129739	-0.0255802	0.705154	0.602951	-0.102203	11	60739019	R	I	CD6	TSS200	opensea	TSS200-opensea		#N/A	#N/A				down	923
7462	CD74	-0.10976	0.549612	-4.91917	4.31796e-06	0.000212412	2.66617	0.600572	0.490812	-0.10976	5	149792783	R	I	CD74	TSS1500	opensea	TSS1500-opensea		#N/A	#N/A				down	972
7558	CDC42	-0.100145	0.479308	-5.99131	5.11461e-08	2.31324e-05	7.0139	0.525804	0.425659	-0.100145	1	22416735	F	II	CDC42	Body	opensea	Body-opensea		#N/A	TRUE				down	998
7618	CDC42SE1	-0.101938	0.471544	-5.17877	1.52709e-06	0.000117709	3.68035	0.518873	0.416934	-0.101938	1	151030981	F	II	CDC42SE1	5'UTR	shore	5'UTR-shore	chr1:151031767-151032352	#N/A	#N/A		rs75781686		down	56882
7949	CECR2	-0.115373	0.70124	-4.95104	3.8058e-06	0.000196988	2.78917	0.754806	0.639433	-0.115373	22	17980996	F	II	CECR2	Body	opensea	Body-opensea		TRUE	#N/A		rs1296750		down	27443
8146	CHD3	-0.13426	0.658046	-4.28104	4.94979e-05	0.00102311	0.301943	0.720381	0.586121	-0.13426	17	7787658	F	II	CHD3	TSS1500	shore	TSS1500-shore	chr17:7788261-7789091	#N/A	#N/A				down	1107
8487	CKLF	-0.104671	0.466314	-6.00616	4.79843e-08	2.24594e-05	7.07676	0.514911	0.41024	-0.104671	16	66585449	R	II	CKLF	TSS1500	shore	TSS1500-shore	chr16:66586268-66586719	#N/A	#N/A				down	51192
8614	CLDN9	-0.100556	0.561907	-3.64587	0.00046291	0.00518609	-1.83724	0.608593	0.508037	-0.100556	16	3062795	F	I	CLDN9	1stExon	shore	1stExon-shore	chr16:3063679-3063981	TRUE	TRUE				down	9080
8674	CLIC1	-0.103719	0.326659	-5.69217	1.8269e-07	4.0733e-05	5.76135	0.374814	0.271095	-0.103719	6	31702915	F	II	CLIC1	Body	opensea	Body-opensea		TRUE	#N/A				down	1192
8694	CLIC5	-0.107933	0.695407	-5.04309	2.63725e-06	0.000158917	3.14682	0.745519	0.637585	-0.107933	6	45979349	R	II	CLIC5	Body	shelf	Body-shelf	chr6:45982877-45983742	#N/A	#N/A				down	53405
8817	CLTC	-0.102218	0.538853	-5.00817	3.03207e-06	0.000172459	3.01074	0.586311	0.484093	-0.102218	17	57712280	R	II	CLTC	Body	opensea	Body-opensea		#N/A	TRUE				down	1213
8922	CMTM7	-0.109712	0.453341	-4.31409	4.38183e-05	0.000939114	0.419445	0.504279	0.394566	-0.109712	3	32432942	R	I	CMTM7	TSS1500	shore	TSS1500-shore	chr3:32433104-32434162	#N/A	#N/A				down	112616
9294	COL18A1	-0.133825	0.660312	-4.52646	1.9782e-05	0.000547632	1.18795	0.722445	0.58862	-0.133825	21	46847898	R	II	COL18A1	Body	shore	Body-shore	chr21:46847505-46847773	#N/A	#N/A				down	80781
9378	COL4A1	-0.109367	0.766213	-3.89313	0.000198811	0.00276402	-1.03252	0.81699	0.707624	-0.109367	13	110937644	F	I	COL4A1	Body	opensea	Body-opensea		#N/A	TRUE		rs61964262		down	1282
9505	COMT	-0.10686	0.636422	-5.41955	5.7008e-07	6.96578e-05	4.64465	0.686036	0.579176	-0.10686	22	19930437	R	II	COMT	5'UTR	shore	5'UTR-shore	chr22:19929096-19929468	#N/A	TRUE				down	1312
9667	CPLX1	-0.10698	0.396651	-4.73169	9.00125e-06	0.000331396	1.9516	0.44632	0.33934	-0.10698	4	779568	R	I	CPLX1	3'UTR	island	3'UTR-island	chr4:778661-780592	#N/A	#N/A				down	10815
9878	CRIM1	-0.115802	0.527141	-5.73652	1.51502e-07	3.7072e-05	5.94531	0.580906	0.465104	-0.115802	2	36688564	F	II	CRIM1	Body	opensea	Body-opensea		#N/A	TRUE		rs3770869		down	51232
9901	CRISPLD2	-0.108244	0.88267	-4.63916	1.2866e-05	0.000413671	1.60484	0.932926	0.824682	-0.108244	16	84885230	R	I	CRISPLD2	Body	opensea	Body-opensea		TRUE	TRUE				down	83716
10062	CSMD1	-0.128597	0.789925	-3.37983	0.00110589	0.00999912	-2.65993	0.849631	0.721034	-0.128597	8	3965218	R	II	CSMD1	Body	opensea	Body-opensea		#N/A	#N/A				down	64478
10176	CTBP2	-0.10628	0.513925	-4.38759	3.33532e-05	0.000775546	0.682813	0.56327	0.45699	-0.10628	10	126836038	R	II	CTBP2	5'UTR	shelf	5'UTR-shelf	chr10:126839791-126841034	TRUE	TRUE				down	1488
10345	CUL1	-0.104442	0.611523	-5.61926	2.48228e-07	4.65932e-05	5.46023	0.660015	0.555572	-0.104442	7	148394842	R	II	CUL1	TSS1500	shore	TSS1500-shore	chr7:148395430-148397002	#N/A	#N/A			rs6959365	down	8454
10361	CUL9	-0.135704	0.48922	-6.58399	3.85379e-09	9.74916e-06	9.56645	0.552226	0.416522	-0.135704	6	43192225	R	II	CUL9	3'UTR	opensea	3'UTR-opensea		#N/A	#N/A				down	23113
10371	CUTA	-0.103182	0.440933	-6.12263	2.90367e-08	1.87775e-05	7.57186	0.488838	0.385657	-0.103182	6	33385056	R	II	CUTA	Body	shore	Body-shore	chr6:33385678-33386262	TRUE	#N/A				down	51596
10441	CUX2	-0.107572	0.580604	-6.49418	5.72917e-09	1.06093e-05	9.17435	0.630549	0.522976	-0.107572	12	111618977	F	II	CUX2	Body	opensea	Body-opensea		#N/A	#N/A			rs75158020	down	23316
10532	CYB561	-0.105283	0.501307	-4.64866	1.2405e-05	0.000404307	1.64024	0.550189	0.444905	-0.105283	17	61524292	F	I	CYB561	TSS1500	island	TSS1500-island	chr17:61523000-61524470	#N/A	TRUE				down	1534
10787	CYS1	-0.106846	0.617743	-4.42514	2.8984e-05	0.000703835	0.818464	0.667351	0.560504	-0.106846	2	10221185	F	II	CYS1	TSS1500	shore	TSS1500-shore	chr2:10219802-10221016	TRUE	#N/A		rs62127556		down	192668
10817	CYTIP	-0.123063	0.567629	-4.502	2.17027e-05	0.000581569	1.09825	0.624765	0.501703	-0.123063	2	158297684	F	II	CYTIP	Body	opensea	Body-opensea		#N/A	#N/A				down	9595
11099	DCLRE1C	-0.109801	0.405645	-5.99968	4.93407e-08	2.27652e-05	7.0493	0.456624	0.346823	-0.109801	10	14995581	F	II	DCLRE1C	Body	shore	Body-shore	chr10:14995680-14996431	#N/A	#N/A		rs41304292		down	64421
11134	DCTPP1	-0.107511	0.473742	-4.89578	4.73592e-06	0.0002241	2.57618	0.523658	0.416147	-0.107511	16	30440564	F	II	DCTPP1	Body	shore	Body-shore	chr16:30441095-30441675	#N/A	#N/A				down	79077
11178	DDB2	-0.104221	0.41092	-4.67484	1.12153e-05	0.000379561	1.73807	0.459309	0.355088	-0.104221	11	47237958	F	II	DDB2	Body	shore	Body-shore	chr11:47236404-47236933	#N/A	TRUE				down	1643
11230	DDR1	-0.102264	0.360856	-4.65669	1.20275e-05	0.000396667	1.67022	0.408336	0.306072	-0.102264	6	30852823	F	II	DDR1	5'UTR	shore	5'UTR-shore	chr6:30852102-30852676	#N/A	#N/A				down	780
11457	DGKG	-0.113468	0.441182	-4.28193	4.93368e-05	0.00102079	0.305085	0.493864	0.380396	-0.113468	3	185960440	F	II	DGKG	Body	opensea	Body-opensea		TRUE	TRUE	low-CpG:187443131-187443162			down	1608
11581	DHX9	-0.104535	0.592216	-4.42284	2.92348e-05	0.000708091	0.810137	0.64075	0.536215	-0.104535	1	182810711	R	II	DHX9	5'UTR	shore	5'UTR-shore	chr1:182808312-182809122	#N/A	#N/A				down	1660
11952	DLX5	-0.113211	0.481432	-5.80075	1.15407e-07	3.29112e-05	6.21288	0.533994	0.420783	-0.113211	7	96655501	R	II	DLX5	TSS1500	shore	TSS1500-shore	chr7:96653467-96654199	#N/A	TRUE				down	1749
12216	DNMT3A	-0.105663	0.610332	-5.74289	1.47473e-07	3.66003e-05	5.97181	0.659389	0.553727	-0.105663	2	25518238	F	II	DNMT3A	Body	opensea	Body-opensea		TRUE	TRUE				down	1788
12484	DRD1	-0.102424	0.34822	-4.78083	7.43485e-06	0.00029344	2.13739	0.395774	0.29335	-0.102424	5	174870968	R	II	DRD1	5'UTR	island	5'UTR-island	chr5:174870753-174872345	TRUE	#N/A			rs56000379	down	1812
12537	DSCR9	-0.150301	0.499259	-4.27963	4.97548e-05	0.00102695	0.296954	0.569042	0.418741	-0.150301	21	38580486	F	II	DSCR9	TSS1500	opensea	TSS1500-opensea		#N/A	TRUE				down	257203
12561	DST	-0.100791	0.24439	-4.3833	3.38905e-05	0.000784457	0.667381	0.291186	0.190395	-0.100791	6	56555274	F	II	DST	Body	opensea	Body-opensea		#N/A	TRUE				down	667
12657	DUSP19	-0.115988	0.27834	-4.8854	4.9339e-06	0.000229404	2.53631	0.332191	0.216203	-0.115988	2	183943938	R	II	DUSP19	Body	opensea	Body-opensea		TRUE	#N/A				down	142679
12676	DUSP28	-0.104043	0.301101	-5.9939	5.05802e-08	2.31324e-05	7.02486	0.349407	0.245364	-0.104043	2	241501342	F	II	DUSP28	3'UTR	shore	3'UTR-shore	chr2:241499582-241500785	#N/A	#N/A				down	285193
12789	DZIP1	-0.10569	0.353142	-5.98099	5.34644e-08	2.34905e-05	6.97023	0.402212	0.296522	-0.10569	13	96296144	R	II	DZIP1	5'UTR	island	5'UTR-island	chr13:96296143-96297059	TRUE	#N/A			rs1886854	down	22873
12873	ECE1	-0.108619	0.505678	-3.6587	0.000443425	0.00502036	-1.79643	0.556108	0.447489	-0.108619	1	21616619	F	I	ECE1	1stExon	island	1stExon-island	chr1:21616380-21617101	TRUE	#N/A				down	1889
13180	EHD4	-0.111395	0.462636	-6.39604	8.82062e-09	1.20875e-05	8.74789	0.514355	0.40296	-0.111395	15	42262356	R	II	EHD4	Body	shore	Body-shore	chr15:42264156-42264861	#N/A	#N/A				down	30844
13184	EHF	-0.104337	0.75137	-4.52001	2.02718e-05	0.000555942	1.16427	0.799813	0.695476	-0.104337	11	34642885	F	II	EHF	5'UTR	opensea	5'UTR-opensea		#N/A	#N/A				down	26298
13306	ELF1	-0.137262	0.58951	-6.01711	4.57769e-08	2.20172e-05	7.12316	0.653238	0.515977	-0.137262	13	41593519	F	II	ELF1	TSS200	opensea	TSS200-opensea		#N/A	#N/A				down	1997
13455	EMP1	-0.110987	0.300359	-3.39933	0.00103897	0.00954188	-2.60121	0.351889	0.240901	-0.110987	12	13349724	F	II	EMP1	5'UTR	opensea	5'UTR-opensea		TRUE	#N/A	low-CpG:13240922-13241005	rs76917784		down	2012
13467	EMP3	-0.109692	0.493073	-4.62903	1.33763e-05	0.000424736	1.56711	0.544001	0.434309	-0.109692	19	48829487	R	II	EMP3	5'UTR	shelf	5'UTR-shelf	chr19:48833394-48833720	TRUE	#N/A				down	2014
13564	ENTPD8	-0.100217	0.712174	-4.10037	9.54785e-05	0.00162605	-0.33004	0.758704	0.658487	-0.100217	9	140330621	R	II	ENTPD8	Body	island	Body-island	chr9:140330620-140330910	#N/A	TRUE				down	377841
13994	ESR1	-0.101166	0.394678	-4.22187	6.14877e-05	0.00118967	0.0930199	0.441649	0.340482	-0.101166	6	152128426	F	II	ESR1	TSS1500	shore	TSS1500-shore	chr6:152128822-152129771	TRUE	#N/A				down	2099
14104	ETS1	-0.102845	0.587635	-5.0995	2.10307e-06	0.000139934	3.36773	0.635384	0.532539	-0.102845	11	128391429	R	I	ETS1	Body	shore	Body-shore	chr11:128391712-128392611	#N/A	#N/A				down	2113
14127	ETV6	-0.10569	0.562234	-5.26879	1.05895e-06	9.59722e-05	4.03831	0.611304	0.505615	-0.10569	12	11975515	F	II	ETV6	Body	opensea	Body-opensea		#N/A	TRUE		rs2710287		down	2120
14290	EZR	-0.110084	0.565842	-6.14879	2.59271e-08	1.77944e-05	7.68357	0.616953	0.506868	-0.110084	6	159235211	F	II	EZR	Body	shelf	Body-shelf	chr6:159239081-159240775	#N/A	#N/A				down	7430
14571	FAM171A1	-0.11427	0.666398	-4.15998	7.701e-05	0.00139492	-0.123519	0.719452	0.605182	-0.11427	10	15296796	F	II	FAM171A1	Body	opensea	Body-opensea		#N/A	TRUE				down	221061
14852	FAT1	-0.116981	0.707788	-5.14853	1.72588e-06	0.000125838	3.56078	0.762101	0.64512	-0.116981	4	187629232	R	II	FAT1	Body	opensea	Body-opensea		#N/A	#N/A	low-CpG:187866051-187866401			down	2195
14960	FBXL14	-0.113893	0.47624	-6.06077	3.79312e-08	2.06683e-05	7.30843	0.529119	0.415226	-0.113893	12	1702001	F	II	FBXL14	Body	shore	Body-shore	chr12:1702638-1704232	#N/A	TRUE				down	144699
15036	FBXO32	-0.119985	0.6601	-6.49855	5.6199e-09	1.05849e-05	9.19339	0.715807	0.595822	-0.119985	8	124529273	R	II	FBXO32	5'UTR	opensea	5'UTR-opensea		TRUE	TRUE				down	114907
15082	FBXW8	-0.102977	0.735367	-4.76547	7.89349e-06	0.000304861	2.0792	0.783177	0.680201	-0.102977	12	117354824	F	II	FBXW8	Body	opensea	Body-opensea		TRUE	TRUE				down	26259
15103	FCHO1	-0.100687	0.758081	-4.56355	1.71809e-05	0.000498895	1.32448	0.804829	0.704142	-0.100687	19	17862017	R	II	FCHO1	5'UTR	shelf	5'UTR-shelf	chr19:17858371-17858891	#N/A	#N/A				down	23149
15133	FCRLA	-0.125612	0.633425	-6.90346	9.29592e-10	6.28588e-06	10.9744	0.691744	0.566132	-0.125612	1	161676469	F	II	FCRLA	TSS1500	opensea	TSS1500-opensea		TRUE	TRUE				down	84824
15238	FGD6	-0.123571	0.751297	-4.68882	1.06259e-05	0.000366838	1.79046	0.808669	0.685099	-0.123571	12	95567919	R	II	FGD6	Body	opensea	Body-opensea		#N/A	TRUE				down	55785
15356	FGFR2	-0.105623	0.51503	-4.37506	3.49475e-05	0.000801344	0.637724	0.564069	0.458446	-0.105623	10	123356236	R	I	FGFR2	5'UTR	shore	5'UTR-shore	chr10:123356616-123358285	#N/A	#N/A				down	2263
15406	FGL2	-0.106423	0.355382	-3.7435	0.000332893	0.00405445	-1.52397	0.404793	0.29837	-0.106423	7	76828885	F	I	FGL2	1stExon	opensea	1stExon-opensea		#N/A	TRUE				down	10875
15666	FMN1	-0.12346	0.571131	-4.44754	2.6648e-05	0.000664799	0.89969	0.628452	0.504992	-0.12346	15	33360271	F	II	FMN1	TSS200	opensea	TSS200-opensea		#N/A	TRUE				down	342184
15705	FMNL2	-0.108564	0.618877	-5.17207	1.56908e-06	0.000119478	3.65384	0.669281	0.560717	-0.108564	2	153302353	R	II	FMNL2	Body	opensea	Body-opensea		#N/A	TRUE				down	114793
15762	FNDC3B	-0.104699	0.460909	-4.74996	8.38461e-06	0.000316162	2.02054	0.50952	0.40482	-0.104699	3	171856961	R	II	FNDC3B	Body	opensea	Body-opensea		#N/A	TRUE				down	64778
15908	FOXK1	-0.123309	0.572335	-5.95429	5.99503e-08	2.45321e-05	6.85746	0.629585	0.506277	-0.123309	7	4721531	R	II	FOXK1	TSS1500	shore	TSS1500-shore	chr7:4721637-4722779	#N/A	#N/A				down	221937
15984	FOXO1	-0.123622	0.396806	-6.36064	1.03014e-08	1.29943e-05	8.59459	0.454202	0.33058	-0.123622	13	41187926	F	II	FOXO1	Body	opensea	Body-opensea		#N/A	TRUE				down	2308
16014	FOXP1	-0.118858	0.610215	-5.41172	5.88824e-07	7.09756e-05	4.61295	0.665399	0.546541	-0.118858	3	71111923	R	II	FOXP1	Body	shore	Body-shore	chr3:71113896-71114102	#N/A	#N/A				down	27086
16202	FUS	-0.100613	0.454208	-4.4135	3.02757e-05	0.000725255	0.776328	0.500921	0.400308	-0.100613	16	31190476	F	II	FUS	TSS1500	shore	TSS1500-shore	chr16:31190820-31192225	#N/A	#N/A			rs77688126	down	2521
16546	GABRP	-0.11692	0.39688	-3.99908	0.000137024	0.00211013	-0.676474	0.451164	0.334244	-0.11692	5	170218684	R	I	GABRP	Body	opensea	Body-opensea		TRUE	#N/A			rs3840313	down	2568
16705	GALNTL6	-0.107079	0.299122	-4.72196	9.34731e-06	0.000339042	1.91495	0.348837	0.241758	-0.107079	4	173961344	F	II	GALNTL6	3'UTR	opensea	3'UTR-opensea		#N/A	TRUE				down	442117
16814	GATA6	-0.102596	0.613009	-3.81569	0.000259991	0.00337187	-1.28856	0.660643	0.558047	-0.102596	18	19756582	R	I	GATA6	Body	shore	Body-shore	chr18:19756794-19757080	#N/A	#N/A				down	2627
16983	GEM	-0.112571	0.751869	-4.36425	3.63824e-05	0.000823388	0.598876	0.804135	0.691563	-0.112571	8	95271635	R	II	GEM	Body	shelf	Body-shelf	chr8:95274410-95274655	TRUE	TRUE				down	2669
17059	GFRA3	-0.10042	0.613032	-4.95459	3.75264e-06	0.000195293	2.80288	0.659656	0.559236	-0.10042	5	137610396	F	II	GFRA3	TSS200	shore	TSS200-shore	chr5:137610105-137610311	#N/A	TRUE				down	2676
17150	GINS1	-0.100452	0.213743	-5.13258	1.84067e-06	0.000130012	3.49787	0.260381	0.159929	-0.100452	20	25387977	R	II	GINS1	TSS1500	shore	TSS1500-shore	chr20:25388232-25388642	#N/A	#N/A				down	9837
17184	GJB2	-0.106271	0.487164	-5.44205	5.19423e-07	6.65494e-05	4.73585	0.536504	0.430233	-0.106271	13	20768138	R	II	GJB2	TSS1500	shore	TSS1500-shore	chr13:20766208-20767779	#N/A	#N/A				down	2706
17207	GJB6	-0.103049	0.528638	-5.50184	4.05332e-07	5.8676e-05	4.97902	0.576482	0.473433	-0.103049	13	20805656	R	II	GJB6	5'UTR	shore	5'UTR-shore	chr13:20806016-20806867	#N/A	TRUE				down	10804
17326	GLT1D1	-0.123863	0.194973	-4.33059	4.12227e-05	0.000899185	0.478342	0.25248	0.128618	-0.123863	12	129454194	F	II	GLT1D1	Body	opensea	Body-opensea		TRUE	TRUE		rs7305672		down	144423
17484	GNG12	-0.120297	0.450428	-5.76686	1.33244e-07	3.48931e-05	6.07156	0.50628	0.385983	-0.120297	1	68202053	F	II	GNG12	5'UTR	opensea	5'UTR-opensea		TRUE	TRUE				down	55970
17659	GP5	-0.10368	0.499805	-5.10984	2.01731e-06	0.000136994	3.40838	0.547942	0.444262	-0.10368	3	194119058	F	II	GP5	5'UTR	shore	5'UTR-shore	chr3:194117601-194118988	#N/A	#N/A				down	2814
18008	GPX4	-0.150415	0.434983	-6.45183	6.90343e-09	1.11443e-05	8.99006	0.504818	0.354403	-0.150415	19	1102675	F	II	GPX4	TSS1500	shore	TSS1500-shore	chr19:1103722-1105758	TRUE	#N/A				down	2879
18129	GREM1	-0.110868	0.326174	-3.89466	0.000197749	0.00275445	-1.0274	0.377648	0.26678	-0.110868	15	33009498	R	II	GREM1	TSS1500	shore	TSS1500-shore	chr15:33009530-33011696	TRUE	#N/A				down	26585
18151	GRHL3	-0.109513	0.441605	-4.37562	3.48746e-05	0.000800194	0.639742	0.492451	0.382937	-0.109513	1	24646085	R	I	GRHL3	Body	shelf	Body-shelf	chr1:24648202-24648985	TRUE	TRUE				down	57822
18738	HCP5	-0.10824	0.530721	-3.97009	0.000151799	0.00227234	-0.774525	0.580975	0.472735	-0.10824	6	31431573	R	II	HCP5	3'UTR	opensea	3'UTR-opensea		#N/A	#N/A				down	10866
18824	HDAC7	-0.107153	0.356407	-4.38285	3.3947e-05	0.000785177	0.665771	0.406157	0.299004	-0.107153	12	48206783	F	I	HDAC7	Body	island	Body-island	chr12:48206721-48207126	TRUE	#N/A				down	51564
18835	HDAC9	-0.101846	0.700095	-3.76138	0.000313209	0.0038764	-1.46597	0.74738	0.645534	-0.101846	7	18548581	R	II	HDAC9	Body	opensea	Body-opensea		#N/A	TRUE				down	9734
19118	HIVEP2	-0.187547	0.66051	-5.00957	3.01525e-06	0.00017181	3.01616	0.747585	0.560038	-0.187547	6	143224179	R	II	HIVEP2	5'UTR	opensea	5'UTR-opensea		#N/A	TRUE			rs79947479	down	3097
19180	HLA-B	-0.112898	0.591556	-4.10106	9.52428e-05	0.00162318	-0.327668	0.643973	0.531075	-0.112898	6	31323677	F	II	HLA-B	Body	shore	Body-shore	chr6:31323946-31325211	#N/A	#N/A		rs41545339	rs4081559	down	3106
19383	HMGA1	-0.101324	0.409975	-4.28993	4.79031e-05	0.000999752	0.33351	0.457018	0.355694	-0.101324	6	34203564	F	II	HMGA1	TSS1500	island	TSS1500-island	chr6:34202567-34206193	#N/A	#N/A				down	3159
20088	HSH2D	-0.102295	0.603724	-5.13257	1.84074e-06	0.000130012	3.49783	0.651218	0.548923	-0.102295	19	16254489	F	II	HSH2D	5'UTR	opensea	5'UTR-opensea		#N/A	#N/A	low-CpG:16115454-16115551			down	84941
20106	HSPA1B	-0.114554	0.47886	-4.78083	7.43487e-06	0.00029344	2.13738	0.532046	0.417492	-0.114554	6	31794759	R	I	HSPA1B	TSS1500	shore	TSS1500-shore	chr6:31795467-31797384	#N/A	#N/A				down	3304
20155	HSPG2	-0.102473	0.445333	-4.56334	1.71953e-05	0.000499171	1.32367	0.492909	0.390437	-0.102473	1	22263347	F	I	HSPG2	Body	opensea	Body-opensea		TRUE	TRUE				down	3339
20175	HTR2A	-0.1095	0.434397	-4.01665	0.000128748	0.00201771	-0.616789	0.485237	0.375736	-0.1095	13	47471052	F	II	HTR2A	1stExon	opensea	1stExon-opensea		#N/A	#N/A		rs61348126		down	3356
20219	HTRA2	-0.104532	0.40629	-5.66979	2.00747e-07	4.24894e-05	5.66874	0.454823	0.350291	-0.104532	2	74758080	F	II	HTRA2	Body	shore	Body-shore	chr2:74756223-74757930	#N/A	#N/A				down	27429
20308	IDO2	-0.155333	0.406669	-4.4924	2.25046e-05	0.000596077	1.06314	0.478788	0.323455	-0.155333	8	39797497	F	II	IDO2	Body	opensea	Body-opensea		#N/A	#N/A				down	169355
20347	IFFO2	-0.168075	0.599111	-4.92426	4.23193e-06	0.000209555	2.68577	0.677146	0.509071	-0.168075	1	19277202	F	II	IFFO2	Body	opensea	Body-opensea		#N/A	#N/A				down	126917
20704	IL17C	-0.130214	0.42049	-5.74947	1.43425e-07	3.60513e-05	5.99917	0.480947	0.350733	-0.130214	16	88704957	R	II	IL17C	TSS200	shore	TSS200-shore	chr16:88706211-88706492	#N/A	#N/A				down	27189
20745	IL18	-0.117516	0.718911	-4.86717	5.30112e-06	0.000239078	2.46643	0.773472	0.655956	-0.117516	11	112034925	R	II	IL18	TSS200	opensea	TSS200-opensea		#N/A	#N/A				down	3606
20810	IL23A	-0.103339	0.453938	-5.93193	6.59771e-08	2.54031e-05	6.76314	0.501916	0.398577	-0.103339	12	56732447	F	II	IL23A	TSS1500	opensea	TSS1500-opensea		#N/A	TRUE				down	51561
20848	IL32	-0.126621	0.407326	-4.1813	7.12775e-05	0.0013197	-0.0491378	0.466114	0.339494	-0.126621	16	3115707	R	II	IL32	5'UTR	opensea	5'UTR-opensea		TRUE	TRUE				down	9235
21410	ITGA2	-0.101845	0.722701	-4.15695	7.78578e-05	0.00140559	-0.134044	0.769986	0.668142	-0.101845	5	52327649	R	II	ITGA2	Body	opensea	Body-opensea		#N/A	TRUE				down	3673
21486	ITGAX	-0.103045	0.374259	-5.13461	1.82561e-06	0.000129364	3.5059	0.422101	0.319056	-0.103045	16	31366429	R	I	ITGAX	TSS200	opensea	TSS200-opensea		TRUE	#N/A				down	3687
21627	ITPKB	-0.127403	0.324856	-5.05685	2.49582e-06	0.000153745	3.2006	0.384008	0.256605	-0.127403	1	226927327	F	II	ITPKB	TSS1500	shore	TSS1500-shore	chr1:226924560-226926553	#N/A	#N/A				down	3707
22152	KCNIP1	-0.103334	0.620313	-3.77403	0.000299957	0.00375233	-1.42481	0.66829	0.564956	-0.103334	5	169949351	F	II	KCNIP1	Body	opensea	Body-opensea		TRUE	TRUE		rs17745849		down	30820
22293	KCNK5	-0.111024	0.584539	-3.88654	0.000203426	0.00280897	-1.05444	0.636086	0.525061	-0.111024	6	39194077	F	II	KCNK5	Body	shelf	Body-shelf	chr6:39196817-39197517	#N/A	#N/A				down	8645
22678	KIAA1143	-0.110887	0.533544	-5.31387	8.80638e-07	8.76894e-05	4.21875	0.585027	0.47414	-0.110887	3	44803447	R	II	KIAA1143	TSS1500	island	TSS1500-island	chr3:44802852-44803618	#N/A	#N/A				down	57456
22689	KIAA1217	-0.141609	0.746076	-4.56381	1.7164e-05	0.000498509	1.32543	0.811823	0.670214	-0.141609	10	24633303	F	II	KIAA1217	Body	opensea	Body-opensea		TRUE	TRUE				down	56243
22714	KIAA1549	-0.101621	0.506342	-6.01037	4.7123e-08	2.23161e-05	7.09461	0.553523	0.451902	-0.101621	7	138620362	R	II	KIAA1549	Body	opensea	Body-opensea		TRUE	TRUE				down	57670
22848	KIF3B	-0.127542	0.641036	-6.09053	3.33582e-08	1.98923e-05	7.43507	0.700252	0.57271	-0.127542	20	30920486	F	II	KIF3B	3'UTR	opensea	3'UTR-opensea		#N/A	TRUE				down	9371
23017	KLF2	-0.103649	0.613236	-4.25393	5.46818e-05	0.00109539	0.205978	0.661359	0.55771	-0.103649	19	16437057	R	II	KLF2	Body	island	Body-island	chr19:16435202-16438064	#N/A	#N/A			rs12462380	down	10365
23025	KLF6	-0.109564	0.343934	-3.4915	0.000771159	0.00761961	-2.32026	0.394803	0.285239	-0.109564	10	3824555	R	II	KLF6	Body	shore	Body-shore	chr10:3823789-3824017	#N/A	#N/A				down	1316
23036	KLF7	-0.104868	0.402165	-5.23251	1.22772e-06	0.000104727	3.89366	0.450854	0.345986	-0.104868	2	208028218	F	II	KLF7	Body	shelf	Body-shelf	chr2:208030852-208031477	TRUE	#N/A		rs78265850		down	8609
23282	KRI1	-0.114713	0.51336	-5.06842	2.38271e-06	0.000149889	3.24586	0.56662	0.451907	-0.114713	19	10676186	R	II	KRI1	Body	shore	Body-shore	chr19:10676267-10677064	#N/A	#N/A				down	65095
23334	KRT7	-0.122209	0.639184	-5.66588	2.04077e-07	4.28169e-05	5.65258	0.695924	0.573715	-0.122209	12	52638005	R	II	KRT7	Body	shore	Body-shore	chr12:52639195-52639416	TRUE	TRUE				down	3855
23720	LDB1	-0.113702	0.616355	-5.14615	1.74255e-06	0.000126499	3.55138	0.669145	0.555443	-0.113702	10	103880868	R	II	LDB1	TSS1500	shore	TSS1500-shore	chr10:103879633-103880628	#N/A	#N/A				down	8861
23732	LDHB	-0.102808	0.4248	-4.19344	6.82013e-05	0.00127918	-0.00670193	0.472532	0.369724	-0.102808	12	21810960	F	II	LDHB	TSS200	shore	TSS200-shore	chr12:21810488-21810766	TRUE	#N/A				down	3945
23763	LDLRAD3	-0.141381	0.363184	-5.77876	1.26696e-07	3.42797e-05	6.12111	0.428825	0.287444	-0.141381	11	36171375	R	II	LDLRAD3	Body	opensea	Body-opensea		#N/A	TRUE				down	143458
23856	LGALS2	-0.104214	0.67842	-6.01086	4.70251e-08	2.23161e-05	7.09666	0.726805	0.622591	-0.104214	22	37976192	F	II	LGALS2	TSS200	opensea	TSS200-opensea		#N/A	#N/A		rs9607478		down	3957
23859	LGALS3	-0.10321	0.646983	-5.075	2.3206e-06	0.000147838	3.27164	0.694902	0.591691	-0.10321	14	55595698	R	II	LGALS3	TSS200	island	TSS200-island	chr14:55595697-55596692	#N/A	#N/A				down	3958
23884	LGALS9	-0.139843	0.404234	-5.12628	1.88805e-06	0.000131948	3.47305	0.469161	0.329318	-0.139843	17	25958267	R	II	LGALS9	Body	opensea	Body-opensea		TRUE	#N/A	low-CpG:22982278-22982414			down	3965
24000	LIF	-0.124994	0.492353	-4.95482	3.74917e-06	0.000195207	2.80378	0.550386	0.425392	-0.124994	22	30643042	R	II	LIF	TSS1500	shore	TSS1500-shore	chr22:30642437-30642671	TRUE	#N/A				down	3976
24030	LIMA1	-0.129623	0.739664	-5.49826	4.11394e-07	5.91674e-05	4.96447	0.799846	0.670223	-0.129623	12	50641260	F	II	LIMA1	Body	opensea	Body-opensea		TRUE	TRUE				down	51474
24063	LIMK1	-0.126176	0.46139	-5.41467	5.81692e-07	7.04416e-05	4.62489	0.519972	0.393795	-0.126176	7	73508868	R	II	LIMK1	Body	opensea	Body-opensea		TRUE	#N/A				down	3984
24145	LIPH	-0.101462	0.276312	-5.6419	2.25723e-07	4.46339e-05	5.55356	0.323419	0.221958	-0.101462	3	185270360	F	II	LIPH	5'UTR	opensea	5'UTR-opensea		#N/A	#N/A	low-CpG:186752987-186753093	rs79952553		down	200879
24198	LMNA	-0.112278	0.363672	-5.37087	6.96834e-07	7.72523e-05	4.44796	0.415801	0.303523	-0.112278	1	156096301	R	II	LMNA	Body	opensea	Body-opensea		TRUE	#N/A				down	4000
24422	LOC730668	-0.100688	0.525361	-5.97157	5.56701e-08	2.37505e-05	6.93041	0.572109	0.471421	-0.100688	22	46403218	R	II	LOC730668	Body	opensea	Body-opensea		#N/A	TRUE				down	730668
24436	LONRF1	-0.185081	0.524955	-6.4255	7.75051e-09	1.14998e-05	8.87568	0.610886	0.425804	-0.185081	8	12584192	R	II	LONRF1	Body	opensea	Body-opensea		#N/A	TRUE				down	91694
24516	LPIN1	-0.100671	0.320535	-4.1963	6.74963e-05	0.00126931	0.0032952	0.367276	0.266604	-0.100671	2	11894464	R	II	LPIN1	5'UTR	opensea	5'UTR-opensea		TRUE	TRUE				down	23175
24580	LRFN4	-0.142197	0.448395	-4.27913	4.98462e-05	0.00102803	0.295184	0.514415	0.372219	-0.142197	11	66624256	R	II	LRFN4	TSS1500	island	TSS1500-island	chr11:66623620-66626614	#N/A	#N/A	high-CpG:66380568-66381172			down	78999
24723	LRRC20	-0.113004	0.317941	-5.12503	1.89758e-06	0.000132394	3.46813	0.370407	0.257403	-0.113004	10	72091514	F	II	LRRC20	Body	opensea	Body-opensea		TRUE	TRUE				down	55222
25090	LXN	-0.10324	0.649102	-4.66876	1.14811e-05	0.000385065	1.71533	0.697035	0.593795	-0.10324	3	158390632	F	II	LXN	TSS200	opensea	TSS200-opensea		TRUE	#N/A				down	56925
25150	LYN	-0.102425	0.624817	-4.86031	5.4461e-06	0.00024285	2.44016	0.672372	0.569947	-0.102425	8	56852290	R	I	LYN	5'UTR	opensea	5'UTR-opensea		#N/A	TRUE				down	4067
25180	LYPD1	-0.104658	0.474247	-3.97622	0.000148552	0.00223746	-0.753826	0.522838	0.41818	-0.104658	2	133428836	F	I	LYPD1	1stExon	island	1stExon-island	chr2:133426652-133428870	#N/A	#N/A		rs12622583		down	116372
25274	MACROD1	-0.111205	0.507145	-3.59613	0.000546468	0.00587718	-1.99455	0.558775	0.447571	-0.111205	11	63828713	R	II	MACROD1	Body	opensea	Body-opensea		#N/A	TRUE				down	28992
25532	MAML2	-0.127955	0.527118	-4.09838	9.6166e-05	0.00163479	-0.336929	0.586526	0.45857	-0.127955	11	96074944	F	II	MAML2	1stExon	opensea	1stExon-opensea		#N/A	TRUE				down	84441
25651	MAP3K13	-0.102916	0.609055	-5.94386	6.26907e-08	2.48546e-05	6.81345	0.656838	0.553922	-0.102916	3	185081403	R	II	MAP3K13	5'UTR	opensea	5'UTR-opensea		#N/A	TRUE				down	9175
25893	MAST3	-0.106513	0.401702	-4.10337	9.44555e-05	0.00161327	-0.319698	0.451155	0.344642	-0.106513	19	18210017	R	I	MAST3	Body	island	Body-island	chr19:18209911-18210268	#N/A	TRUE				down	23031
25960	MAZ	-0.115476	0.545155	-3.46343	0.00084488	0.00817109	-2.40641	0.598769	0.483292	-0.115476	16	29819361	R	II	MAZ	Body	island	Body-island	chr16:29818681-29819554	#N/A	#N/A				down	4150
26116	MCF2L2	-0.112389	0.164397	-4.04233	0.000117513	0.00188938	-0.529273	0.216578	0.104189	-0.112389	3	183003859	R	II	MCF2L2	Body	opensea	Body-opensea		TRUE	TRUE				down	23101
26219	ME3	-0.123361	0.534718	-4.82171	6.33684e-06	0.000266161	2.29278	0.591992	0.468631	-0.123361	11	86304288	R	II	ME3	Body	opensea	Body-opensea		TRUE	TRUE				down	10873
26248	MED15	-0.102799	0.486544	-6.10564	3.12508e-08	1.94109e-05	7.49941	0.534273	0.431473	-0.102799	22	20863762	F	II	MED15	Body	shore	Body-shore	chr22:20861679-20862252	TRUE	#N/A				down	51586
26381	MEIS2	-0.125227	0.499372	-4.81261	6.56677e-06	0.000271573	2.25811	0.557513	0.432286	-0.125227	15	37390176	R	II	MEIS2	1stExon	island	1stExon-island	chr15:37390175-37390380	TRUE	#N/A				down	4212
26647	MGP	-0.14868	0.594785	-4.40736	3.09791e-05	0.000736927	0.75414	0.663815	0.515135	-0.14868	12	15039432	R	II	MGP	TSS1500	opensea	TSS1500-opensea		#N/A	#N/A				down	4256
26892	MIR155HG	-0.102434	0.829966	-5.12347	1.90955e-06	0.000132817	3.46199	0.877525	0.77509	-0.102434	21	26946167	R	II	MIR155HG	Body	opensea	Body-opensea		#N/A	#N/A				down	114614
26957	MIR21	-0.14953	0.646017	-4.77709	7.54419e-06	0.000296032	2.12319	0.715442	0.565911	-0.14953	17	57918500	F	II	MIR21	TSS200	opensea	TSS200-opensea		#N/A	#N/A				down	406991
27303	MMP7	-0.114583	0.413155	-4.17089	7.40228e-05	0.00135702	-0.0854818	0.466354	0.351771	-0.114583	11	102401523	R	II	MMP7	TSS200	opensea	TSS200-opensea		#N/A	#N/A				down	4316
27541	MREG	-0.102073	0.357601	-4.26603	5.23068e-05	0.00106304	0.248755	0.404992	0.30292	-0.102073	2	216877984	F	I	MREG	1stExon	island	1stExon-island	chr2:216877899-216878352	#N/A	#N/A		rs1864253		down	55686
27842	MTPN	-0.124785	0.248407	-5.10452	2.06096e-06	0.000138409	3.38748	0.306343	0.181557	-0.124785	7	135662345	F	II	MTPN	TSS200	shore	TSS200-shore	chr7:135661841-135662272	#N/A	#N/A				down	136319
27885	MTUS2	-0.108637	0.662091	-5.34714	7.68286e-07	8.1174e-05	4.35237	0.712529	0.603892	-0.108637	13	30055092	F	II	MTUS2	Body	shore	Body-shore	chr13:30054342-30054558	#N/A	#N/A				down	23281
27894	MUC12	-0.101689	0.562829	-4.47689	2.38612e-05	0.000618965	1.00651	0.610042	0.508353	-0.101689	7	100611492	F	I	MUC12	TSS1500	shore	TSS1500-shore	chr7:100608736-100609793	#N/A	TRUE		rs75746692	rs78083466	down	10071
27975	MX2	-0.126313	0.476566	-5.61718	2.50396e-07	4.67216e-05	5.4517	0.535211	0.408898	-0.126313	21	42733894	R	II	MX2	TSS200	opensea	TSS200-opensea		TRUE	#N/A				down	4600
27995	MYADM	-0.118803	0.650205	-4.27219	5.11364e-05	0.00104648	0.270559	0.705363	0.58656	-0.118803	19	54369436	F	I	MYADM	TSS200	island	TSS200-island	chr19:54369387-54369809	#N/A	#N/A				down	91663
28027	MYC	-0.152716	0.518831	-4.52016	2.02604e-05	0.000555765	1.16481	0.589735	0.437019	-0.152716	8	128750871	F	II	MYC	Body	island	Body-island	chr8:128747805-128751279	#N/A	#N/A				down	4609
28038	MYEOV	-0.131476	0.458972	-5.6296	2.37689e-07	4.58785e-05	5.50283	0.520014	0.388538	-0.131476	11	69064741	R	II	MYEOV	3'UTR	opensea	3'UTR-opensea		#N/A	TRUE				down	26579
28193	MYO16	-0.117182	0.742097	-3.53871	0.000660674	0.00678473	-2.17416	0.796503	0.679321	-0.117182	13	109610256	R	II	MYO16	Body	opensea	Body-opensea		#N/A	TRUE				down	23026
28239	MYO1E	-0.108877	0.677732	-5.3566	7.38971e-07	7.97501e-05	4.39046	0.728282	0.619405	-0.108877	15	59592763	F	II	MYO1E	Body	opensea	Body-opensea		TRUE	TRUE		rs76180476		down	4643
28336	MYOM2	-0.11903	0.364414	-3.67304	0.000422558	0.00484511	-1.75067	0.419678	0.300648	-0.11903	8	2023251	F	II	MYOM2	Body	opensea	Body-opensea		#N/A	#N/A				down	9172
28401	NAA25	-0.131221	0.635523	-5.24362	1.17341e-06	0.000101868	3.93791	0.696447	0.565225	-0.131221	12	112534559	R	II	NAA25	Body	opensea	Body-opensea		TRUE	TRUE				down	80018
28507	NAPG	-0.101321	0.701796	-4.00306	0.000135107	0.00208786	-0.66298	0.748838	0.647517	-0.101321	18	10525447	R	II	NAPG	TSS1500	shore	TSS1500-shore	chr18:10525841-10526433	#N/A	#N/A				down	8774
28521	NAT1	-0.161865	0.494002	-6.05746	3.84753e-08	2.06882e-05	7.29439	0.569154	0.407288	-0.161865	8	18067560	F	II	NAT1	TSS200	opensea	TSS200-opensea		TRUE	TRUE		rs72554605		down	9
28556	NAV2	-0.124501	0.680128	-6.50674	5.42083e-09	1.04969e-05	9.22905	0.737931	0.613431	-0.124501	11	19463903	F	II	NAV2	Body	opensea	Body-opensea		TRUE	TRUE				down	89797
28661	NCK2	-0.108515	0.370707	-4.75908	8.09215e-06	0.000309778	2.05504	0.421089	0.312574	-0.108515	2	106362832	F	II	NCK2	5'UTR	shore	5'UTR-shore	chr2:106361032-106362218	#N/A	#N/A				down	8440
28912	NEDD4	-0.10266	0.637005	-5.86635	8.73052e-08	2.88514e-05	6.48742	0.684669	0.582009	-0.10266	15	56138634	F	II	NEDD4	Body	opensea	Body-opensea		TRUE	#N/A			rs35198798	down	4734
29140	NFATC4	-0.130545	0.477662	-4.30066	4.60459e-05	0.00097206	0.371628	0.538273	0.407727	-0.130545	14	24836194	R	I	NFATC4	1stExon	island	1stExon-island	chr14:24835810-24836220	#N/A	#N/A				down	4776
29263	NFKBID	-0.102879	0.568268	-4.11105	9.18842e-05	0.00158143	-0.293196	0.616033	0.513154	-0.102879	19	36389833	F	II	NFKBID	5'UTR	island	5'UTR-island	chr19:36389545-36389967	#N/A	#N/A				down	84807
29272	NFKBIE	-0.137548	0.541707	-6.5582	4.31933e-09	9.74916e-06	9.45366	0.605568	0.46802	-0.137548	6	44232189	F	II	NFKBIE	Body	shore	Body-shore	chr6:44232880-44233447	#N/A	#N/A				down	4794
29866	NQO1	-0.105743	0.451163	-4.62536	1.35661e-05	0.00042863	1.55345	0.500258	0.394515	-0.105743	16	69760928	R	II	NQO1	TSS1500	shore	TSS1500-shore	chr16:69760293-69760506	#N/A	#N/A				down	1728
30633	OPCML	-0.110243	0.369915	-4.15955	7.71279e-05	0.00139614	-0.12499	0.4211	0.310856	-0.110243	11	132287342	R	II	OPCML	3'UTR	opensea	3'UTR-opensea		#N/A	#N/A				down	4978
30919	OSCP1	-0.126501	0.436738	-4.29713	4.66498e-05	0.000981341	0.359067	0.495471	0.36897	-0.126501	1	36915840	R	I	OSCP1	Body	island	Body-island	chr1:36915796-36916324	#N/A	#N/A				down	127700
31167	PACS1	-0.121511	0.462017	-6.1499	2.58022e-08	1.77867e-05	7.68833	0.518433	0.396922	-0.121511	11	65880175	R	II	PACS1	Body	opensea	Body-opensea		#N/A	TRUE				down	55690
31248	PALLD	-0.105516	0.687984	-4.56206	1.72788e-05	0.000500927	1.31897	0.736973	0.631457	-0.105516	4	169555699	R	II	PALLD	5'UTR	shelf	5'UTR-shelf	chr4:169552716-169552947	TRUE	TRUE				down	23022
31347	PAQR5	-0.102061	0.480844	-4.73057	9.04027e-06	0.000332104	1.9474	0.528229	0.426168	-0.102061	15	69591110	R	II	PAQR5	TSS200	shore	TSS200-shore	chr15:69591246-69591754	TRUE	#N/A				down	54852
31367	PARD3	-0.112331	0.350312	-6.0539	3.90713e-08	2.08759e-05	7.27925	0.402466	0.290135	-0.112331	10	34410961	F	II	PARD3	Body	opensea	Body-opensea		#N/A	TRUE				down	56288
31617	PC	-0.119206	0.461528	-4.12159	8.8463e-05	0.0015385	-0.256753	0.516874	0.397668	-0.119206	11	66624841	R	I	PC	Body	island	Body-island	chr11:66623620-66626614	#N/A	#N/A				down	5091
31963	PDE4B	-0.180217	0.428136	-5.95352	6.0149e-08	2.45534e-05	6.8542	0.511808	0.331592	-0.180217	1	66799419	R	II	PDE4B	Body	opensea	Body-opensea		#N/A	TRUE				down	5142
32051	PDGFA	-0.16493	0.483569	-4.18651	6.99422e-05	0.0013023	-0.0309482	0.560143	0.395214	-0.16493	7	544525	F	I	PDGFA	Body	opensea	Body-opensea		#N/A	#N/A		rs76169668		down	5154
32076	PDGFRA	-0.119409	0.581337	-5.24606	1.16182e-06	0.000101316	3.94762	0.636776	0.517368	-0.119409	4	55095529	F	II	PDGFRA	1stExon	shore	1stExon-shore	chr4:55096185-55100331	TRUE	#N/A				down	5156
32217	PEBP4	-0.100605	0.516351	-5.02032	2.88853e-06	0.000167435	3.05804	0.563061	0.462455	-0.100605	8	22773857	R	II	PEBP4	Body	opensea	Body-opensea		#N/A	TRUE				down	157310
32337	PEX5	-0.105488	0.425492	-3.96906	0.000152352	0.00227831	-0.778006	0.474468	0.368981	-0.105488	12	7341644	F	II	PEX5	TSS1500	shore	TSS1500-shore	chr12:7342074-7342417	#N/A	#N/A				down	5830
32343	PEX6	-0.106166	0.644281	-5.81743	1.07518e-07	3.19748e-05	6.28253	0.693572	0.587406	-0.106166	6	42939029	F	II	PEX6	Body	opensea	Body-opensea		TRUE	TRUE				down	5190
32769	PIK3IP1	-0.128288	0.393734	-5.27365	1.03814e-06	9.49688e-05	4.05773	0.453296	0.325008	-0.128288	22	31686466	R	II	PIK3IP1	Body	shore	Body-shore	chr22:31686636-31687371	#N/A	#N/A				down	113791
32826	PIP4K2A	-0.183971	0.688189	-6.53335	4.82021e-09	1.01431e-05	9.34516	0.773604	0.589633	-0.183971	10	22972299	R	II	PIP4K2A	Body	opensea	Body-opensea		#N/A	TRUE				down	5305
32832	PIP5K1A	-0.114825	0.560814	-6.34515	1.10243e-08	1.3457e-05	8.5276	0.614126	0.4993	-0.114825	1	151172905	F	II	PIP5K1A	Body	shore	Body-shore	chr1:151170847-151171532	#N/A	#N/A				down	8394
33284	PLEKHG3	-0.118058	0.566941	-5.46976	4.63085e-07	6.27545e-05	4.8484	0.621754	0.503696	-0.118058	14	65170209	R	II	PLEKHG3	TSS1500	shore	TSS1500-shore	chr14:65170876-65172007	#N/A	#N/A				down	26030
33323	PLEKHG6	-0.102743	0.552528	-4.74506	8.54558e-06	0.000320503	2.00207	0.60023	0.497487	-0.102743	12	6422131	R	II	PLEKHG6	1stExon	shelf	1stExon-shelf	chr12:6419603-6420024	TRUE	TRUE				down	55200
33565	PML	-0.108174	0.615759	-4.64483	1.25886e-05	0.000407739	1.62598	0.665982	0.557809	-0.108174	15	74289586	R	II	PML	Body	shore	Body-shore	chr15:74290344-74290760	TRUE	#N/A				down	5371
33824	POU6F2	-0.102496	0.469673	-3.49842	0.000753935	0.00749251	-2.29893	0.51726	0.414764	-0.102496	7	39125198	F	II	POU6F2	Body	opensea	Body-opensea		#N/A	TRUE				down	11281
33862	PPCDC	-0.116394	0.388428	-5.76302	1.35433e-07	3.51564e-05	6.05554	0.442468	0.326074	-0.116394	15	75339541	F	II	PPCDC	Body	opensea	Body-opensea		TRUE	TRUE		rs78664321		down	60490
34069	PPP2CA	-0.106495	0.310534	-5.73815	1.50458e-07	3.6985e-05	5.95211	0.359978	0.253483	-0.106495	5	133560149	R	II	PPP2CA	Body	shore	Body-shore	chr5:133561140-133562544	#N/A	#N/A				down	5515
34478	PRKAG2	-0.102781	0.521695	-5.70144	1.75691e-07	3.98662e-05	5.79973	0.569415	0.466634	-0.102781	7	151330217	F	II	PRKAG2	Body	opensea	Body-opensea		#N/A	#N/A	low-CpG:150961128-150961211			down	51422
34530	PRKAR1B	-0.121721	0.706146	-3.59365	0.000550987	0.0059153	-2.00235	0.76266	0.640938	-0.121721	7	601503	R	I	PRKAR1B	Body	island	Body-island	chr7:601121-601729	TRUE	#N/A				down	5575
34585	PRKCE	-0.121495	0.530493	-6.28905	1.40873e-08	1.42641e-05	8.28551	0.586901	0.465407	-0.121495	2	46088325	R	II	PRKCE	Body	opensea	Body-opensea		#N/A	TRUE				down	5581
34605	PRKCH	-0.16297	0.306939	-5.85644	9.10711e-08	2.92179e-05	6.44586	0.382604	0.219634	-0.16297	14	61938892	R	II	PRKCH	Body	opensea	Body-opensea		TRUE	TRUE				down	5583
35060	PSMB9	-0.10754	0.714761	-4.59137	1.54511e-05	0.000465519	1.42731	0.76469	0.657151	-0.10754	6	32823728	R	II	PSMB9	Body	shore	Body-shore	chr6:32820849-32822370	#N/A	#N/A				down	5698
35230	PTK2	-0.123387	0.535943	-5.5435	3.40771e-07	5.40206e-05	5.14922	0.59323	0.469842	-0.123387	8	141801307	F	II	PTK2	Body	opensea	Body-opensea		TRUE	TRUE				down	5747
35570	PTTG1IP	-0.14075	0.582727	-4.8226	6.31492e-06	0.000265627	2.29615	0.648075	0.507325	-0.14075	21	46289921	F	II	PTTG1IP	Body	shelf	Body-shelf	chr21:46292709-46294744	TRUE	#N/A		rs2282114		down	754
35702	PYROXD2	-0.109373	0.443155	-3.75544	0.000319623	0.00393653	-1.48526	0.493936	0.384562	-0.109373	10	100175106	F	II	PYROXD2	TSS200	opensea	TSS200-opensea		#N/A	TRUE		rs34491145		down	84795
35860	RAB36	-0.113929	0.636833	-4.08746	0.000100008	0.00168127	-0.374537	0.689729	0.5758	-0.113929	22	23487104	F	II	RAB36	TSS1500	shore	TSS1500-shore	chr22:23487368-23487970	#N/A	#N/A				down	9609
35893	RAB3IP	-0.166898	0.422681	-5.00646	3.05291e-06	0.000173165	3.00406	0.500169	0.333271	-0.166898	12	70215816	F	II	RAB3IP	3'UTR	opensea	3'UTR-opensea		#N/A	TRUE		rs1000783		down	117177
35930	RAB8B	-0.142774	0.460633	-5.04772	2.58876e-06	0.000157263	3.16493	0.526921	0.384147	-0.142774	15	63504871	F	I	RAB8B	Body	opensea	Body-opensea		#N/A	TRUE				down	51762
35939	RABGAP1L	-0.11149	0.427872	-4.14172	8.22671e-05	0.00146171	-0.186989	0.479635	0.368146	-0.11149	1	174769548	R	II	RABGAP1L	Body	opensea	Body-opensea		#N/A	TRUE				down	9910
36052	RALGAPA2	-0.10101	0.554508	-6.15038	2.57488e-08	1.77867e-05	7.69037	0.601405	0.500395	-0.10101	20	20433062	F	II	RALGAPA2	Body	shore	Body-shore	chr20:20433105-20433329	TRUE	TRUE				down	57186
36065	RALGDS	-0.123784	0.564711	-5.7477	1.44503e-07	3.62055e-05	5.99181	0.622182	0.498398	-0.123784	9	136017755	R	II	RALGDS	Body	shore	Body-shore	chr9:136019708-136020134	#N/A	TRUE				down	5900
36298	RASAL2	-0.104076	0.359998	-5.14537	1.74805e-06	0.000126659	3.5483	0.408319	0.304243	-0.104076	1	178064623	F	II	RASAL2	Body	shore	Body-shore	chr1:178062712-178063846	#N/A	#N/A		rs76102146		down	9462
36420	RASSF3	-0.194128	0.273098	-5.09246	2.16341e-06	0.0001424	3.34011	0.363229	0.169101	-0.194128	12	65019329	R	II	RASSF3	Body	opensea	Body-opensea		TRUE	TRUE				down	283349
36508	RBM28	-0.115239	0.379291	-6.50258	5.52096e-09	1.04975e-05	9.21095	0.432795	0.317556	-0.115239	7	127984319	F	II	RBM28	TSS1500	shore	TSS1500-shore	chr7:127983683-127984096	#N/A	#N/A				down	55131
36641	RBPMS	-0.127873	0.442829	-4.14746	8.05787e-05	0.00144039	-0.167062	0.502199	0.374326	-0.127873	8	30245145	F	II	RBPMS	Body	shelf	Body-shelf	chr8:30241416-30242878	#N/A	#N/A				down	11030
36659	RCAN3	-0.112456	0.51858	-4.94871	3.84116e-06	0.000198001	2.78016	0.570791	0.458335	-0.112456	1	24829987	R	II	RCAN3	5'UTR	shore	5'UTR-shore	chr1:24828865-24829878	#N/A	#N/A				down	11123
36788	RELL1	-0.13602	0.587201	-6.28872	1.41079e-08	1.42641e-05	8.28407	0.650354	0.514334	-0.13602	4	37668528	R	II	RELL1	Body	opensea	Body-opensea		TRUE	#N/A				down	768211
37790	RPL10A	-0.108275	0.395962	-5.94549	6.22551e-08	2.48546e-05	6.82031	0.446233	0.337958	-0.108275	6	35437101	F	II	RPL10A	Body	shore	Body-shore	chr6:35435810-35437084	#N/A	#N/A		rs78498719		down	4736
37992	RPSAP58	-0.100683	0.327651	-5.16758	1.59785e-06	0.000120535	3.63608	0.374397	0.273713	-0.100683	19	23945641	R	II	RPSAP58	TSS200	shore	TSS200-shore	chr19:23945713-23946128	TRUE	#N/A				down	388524
38000	RPTOR	-0.133025	0.475608	-4.91417	4.40425e-06	0.000215195	2.64689	0.537369	0.404345	-0.133025	17	78806891	R	II	RPTOR	Body	opensea	Body-opensea		#N/A	TRUE				down	57521
38233	RUNX1	-0.106839	0.491483	-4.52382	1.99811e-05	0.000551257	1.17825	0.541087	0.434248	-0.106839	21	36419648	R	II	RUNX1	Body	opensea	Body-opensea		TRUE	#N/A				down	861
38523	SAMD13	-0.113751	0.513929	-4.16767	7.48924e-05	0.0013684	-0.0967119	0.566742	0.452991	-0.113751	1	84766821	F	II	SAMD13	TSS1500	shore	TSS1500-shore	chr1:84764108-84764906	#N/A	#N/A				down	148418
38543	SAMD4A	-0.138729	0.375292	-5.72177	1.61242e-07	3.83781e-05	5.88407	0.439702	0.300973	-0.138729	14	55119082	F	I	SAMD4A	Body	opensea	Body-opensea		TRUE	TRUE				down	23034
38599	SASH1	-0.136659	0.537518	-6.91973	8.64271e-10	6.13942e-06	11.0466	0.600967	0.464308	-0.136659	6	148762393	F	II	SASH1	Body	opensea	Body-opensea		TRUE	TRUE				down	23328
38852	SCP2	-0.162287	0.439446	-6.11507	3.00021e-08	1.90057e-05	7.53961	0.514794	0.352507	-0.162287	1	53480710	F	II	SCP2	1stExon	opensea	1stExon-opensea		#N/A	#N/A		rs7529265		down	6342
38870	SCRT2	-0.107117	0.578382	-3.65093	0.000455135	0.00511942	-1.82116	0.628115	0.520998	-0.107117	20	652263	R	II	SCRT2	Body	shelf	Body-shelf	chr20:655880-656604	#N/A	#N/A				down	85508
38981	SDK1	-0.12438	0.515187	-4.88371	4.96694e-06	0.000230225	2.52981	0.572935	0.448555	-0.12438	7	3901843	R	II	SDK1	Body	opensea	Body-opensea		#N/A	TRUE				down	221935
39110	SEL1L3	-0.121138	0.540087	-4.75952	8.07842e-06	0.000309429	2.05669	0.59633	0.475192	-0.121138	4	25861586	R	II	SEL1L3	Body	shelf	Body-shelf	chr4:25863760-25864845	#N/A	#N/A				down	23231
39161	SEMA3E	-0.12647	0.63593	-4.8761	5.11795e-06	0.000234132	2.50065	0.694648	0.568178	-0.12647	7	83097669	R	II	SEMA3E	Body	opensea	Body-opensea		TRUE	TRUE		rs2249189		down	9723
39297	SERPINA12	-0.125756	0.51715	-5.70595	1.72381e-07	3.96997e-05	5.81842	0.575536	0.44978	-0.125756	14	94984381	F	II	SERPINA12	TSS1500	opensea	TSS1500-opensea		#N/A	TRUE				down	145264
39630	SH2B3	-0.121158	0.549917	-5.15643	1.67158e-06	0.000123721	3.592	0.606169	0.485011	-0.121158	12	111842896	R	II	SH2B3	TSS1500	shore	TSS1500-shore	chr12:111842938-111844392	#N/A	#N/A				down	10019
39810	SH3PXD2B	-0.154852	0.740553	-5.36677	7.08712e-07	7.80797e-05	4.43141	0.812449	0.657597	-0.154852	5	171870875	R	II	SH3PXD2B	Body	opensea	Body-opensea		TRUE	TRUE				down	285590
39957	SHB	-0.100171	0.826735	-4.33312	4.0838e-05	0.000893298	0.487387	0.873243	0.773072	-0.100171	9	37964247	F	II	SHB	Body	opensea	Body-opensea		TRUE	TRUE				down	6461
40189	SIPA1	-0.113055	0.408268	-4.82018	6.37493e-06	0.000267203	2.28695	0.460758	0.347703	-0.113055	11	65406254	F	II	SIPA1	5'UTR	shelf	5'UTR-shelf	chr11:65408344-65408631	#N/A	#N/A				down	6494
40330	SLAMF1	-0.134661	0.561906	-6.29824	1.35336e-08	1.41828e-05	8.3251	0.624427	0.489766	-0.134661	1	160607887	R	II	SLAMF1	Body	opensea	Body-opensea		#N/A	#N/A				down	6504
40565	SLC17A8	-0.105993	0.421397	-6.56541	4.1839e-09	9.74916e-06	9.48516	0.470608	0.364615	-0.105993	12	100751051	F	II	SLC17A8	1stExon	opensea	1stExon-opensea		#N/A	TRUE				down	246213
40627	SLC1A3	-0.145938	0.597201	-4.68549	1.07636e-05	0.000370011	1.77797	0.664958	0.51902	-0.145938	5	36657993	R	II	SLC1A3	Body	opensea	Body-opensea		TRUE	TRUE			rs79029484	down	6507
40641	SLC1A5	-0.116053	0.502072	-4.24402	5.67028e-05	0.00112473	0.171023	0.555954	0.439901	-0.116053	19	47288066	R	II	SLC1A5	1stExon	shelf	1stExon-shelf	chr19:47290585-47291983	#N/A	#N/A	low-CpG:51979838-51980043			down	6510
40691	SLC22A18	-0.100853	0.768032	-4.97876	3.40898e-06	0.000184775	2.8965	0.814857	0.714004	-0.100853	11	2933967	F	II	SLC22A18	Body	shelf	Body-shelf	chr11:2930289-2931093	#N/A	TRUE				down	5002
40832	SLC25A24	-0.112151	0.492125	-4.67343	1.12762e-05	0.000380748	1.73281	0.544195	0.432044	-0.112151	1	108743728	R	II	SLC25A24	TSS1500	shore	TSS1500-shore	chr1:108742400-108743201	#N/A	#N/A				down	29957
41096	SLC35F2	-0.114716	0.694297	-6.45923	6.68243e-09	1.11443e-05	9.02222	0.747559	0.632842	-0.114716	11	107711742	R	II	SLC35F2	Body	opensea	Body-opensea		TRUE	TRUE				down	54733
41258	SLC43A3	-0.105864	0.44129	-5.81888	1.06857e-07	3.18932e-05	6.2886	0.490441	0.384577	-0.105864	11	57192432	R	II	SLC43A3	Body	shore	Body-shore	chr11:57194340-57194650	TRUE	#N/A				down	29015
41396	SLC5A10	-0.130977	0.7073	-5.2708	1.05029e-06	9.55922e-05	4.04635	0.768111	0.637134	-0.130977	17	18854560	R	II	SLC5A10	TSS1500	opensea	TSS1500-opensea		#N/A	#N/A				down	125206
41495	SLC6A19	-0.100009	0.682781	-4.16603	7.53378e-05	0.00137441	-0.102413	0.729214	0.629205	-0.100009	5	1201359	R	II	SLC6A19	TSS1500	shore	TSS1500-shore	chr5:1201443-1202138	#N/A	#N/A			rs72542501	down	340024
41523	SLC6A6	-0.140782	0.639869	-4.11436	9.07975e-05	0.00156796	-0.28177	0.705232	0.564451	-0.140782	3	14494726	R	I	SLC6A6	Body	opensea	Body-opensea		TRUE	TRUE				down	6533
41563	SLC7A6	-0.110785	0.191509	-5.92428	6.81703e-08	2.56944e-05	6.73094	0.242944	0.13216	-0.110785	16	68299128	R	II	SLC7A6	5'UTR	shore	5'UTR-shore	chr16:68298012-68298979	#N/A	#N/A				down	9057
41766	SLIT3	-0.102893	0.748144	-3.82264	0.000253838	0.00331235	-1.26573	0.795916	0.693023	-0.102893	5	168403541	F	II	SLIT3	Body	opensea	Body-opensea		#N/A	TRUE				down	6586
41867	SMARCD1	-0.115851	0.383255	-5.11927	1.94209e-06	0.000133937	3.44549	0.437043	0.321191	-0.115851	12	50478480	F	I	SMARCD1	TSS1500	shore	TSS1500-shore	chr12:50478886-50479329	#N/A	#N/A				down	6602
41883	SMC5	-0.108878	0.819959	-4.06172	0.00010966	0.00179551	-0.462935	0.87051	0.761632	-0.108878	9	72877684	F	II	SMC5	Body	shelf	Body-shelf	chr9:72873689-72874264	#N/A	#N/A				down	23137
42167	SNORD30	-0.104712	0.419047	-5.12331	1.91076e-06	0.000132842	3.46137	0.467664	0.362951	-0.104712	11	62622234	R	II	SNORD30	TSS1500	shore	TSS1500-shore	chr11:62623359-62623877	#N/A	#N/A				down	9299
42198	SNORD75	-0.126768	0.651738	-6.85169	1.17189e-09	6.83723e-06	10.7449	0.710595	0.583827	-0.126768	1	173836307	F	II	SNORD75	TSS1500	shore	TSS1500-shore	chr1:173837172-173837917	#N/A	#N/A		rs12090169		down	692195
42369	SOD3	-0.103831	0.60439	-4.43476	2.79577e-05	0.000686593	0.853308	0.652597	0.548766	-0.103831	4	24796689	F	II	SOD3	TSS1500	opensea	TSS1500-opensea		TRUE	TRUE				down	6649
42379	SORBS1	-0.106976	0.705858	-6.08738	3.38163e-08	1.99837e-05	7.42162	0.755526	0.64855	-0.106976	10	97201172	R	II	SORBS1	5'UTR	opensea	5'UTR-opensea		#N/A	#N/A				down	10580
42479	SORT1	-0.137404	0.384105	-3.7816	0.000292282	0.00368034	-1.40012	0.447899	0.310495	-0.137404	1	109940029	R	II	SORT1	Body	shore	Body-shore	chr1:109940074-109940894	#N/A	#N/A				down	6272
42596	SPAG17	-0.10522	0.660105	-5.46848	4.65556e-07	6.28791e-05	4.84319	0.708958	0.603737	-0.10522	1	118679290	R	II	SPAG17	Body	opensea	Body-opensea		#N/A	TRUE				down	200162
42618	SPATA13	-0.125085	0.298055	-5.25113	1.13805e-06	0.000100155	3.96784	0.356131	0.231045	-0.125085	13	24846221	R	I	SPATA13	Body	opensea	Body-opensea		TRUE	#N/A				down	221178
42900	SPRY2	-0.122149	0.607747	-4.87574	5.12519e-06	0.000234347	2.49928	0.664459	0.54231	-0.122149	13	80911626	R	I	SPRY2	Body	shore	Body-shore	chr13:80913157-80913461	#N/A	#N/A				down	10253
42911	SPRYD3	-0.110035	0.335913	-6.11657	2.98072e-08	1.89736e-05	7.54604	0.387001	0.276966	-0.110035	12	53472792	R	II	SPRYD3	Body	shore	Body-shore	chr12:53472814-53473491	#N/A	#N/A				down	84926
42945	SPTBN1	-0.107836	0.681962	-5.18887	1.46583e-06	0.000115167	3.72036	0.732029	0.624192	-0.107836	2	54783773	F	II	SPTBN1	Body	shore	Body-shore	chr2:54785026-54785969	#N/A	#N/A		rs10656687		down	6711
43030	SRCIN1	-0.105011	0.403378	-3.63404	0.000481606	0.0053433	-1.87479	0.452133	0.347123	-0.105011	17	36728859	F	I	SRCIN1	Body	island	Body-island	chr17:36728633-36729284	#N/A	TRUE				down	80725
43063	SRGAP1	-0.149746	0.566527	-4.30695	4.49887e-05	0.000956152	0.394024	0.636052	0.486306	-0.149746	12	64482597	R	II	SRGAP1	Body	opensea	Body-opensea		TRUE	TRUE				down	57522
43079	SRI	-0.109352	0.50103	-4.72037	9.40513e-06	0.000340323	1.90897	0.5518	0.442448	-0.109352	7	87848358	R	II	SRI	Body	shore	Body-shore	chr7:87849003-87849594	#N/A	#N/A				down	6717
43106	SRPK2	-0.100607	0.693807	-4.43327	2.81148e-05	0.000689284	0.847891	0.740517	0.63991	-0.100607	7	104865796	F	II	SRPK2	Body	opensea	Body-opensea		TRUE	TRUE				down	6733
43242	ST14	-0.111042	0.520797	-4.11585	9.03116e-05	0.00156218	-0.276617	0.572352	0.46131	-0.111042	11	130030261	F	II	ST14	Body	island	Body-island	chr11:130029658-130030262	#N/A	#N/A		rs3016859		down	6768
43274	ST3GAL4	-0.102656	0.43256	-4.86809	5.2819e-06	0.000238681	2.46996	0.480221	0.377565	-0.102656	11	126225276	F	II	ST3GAL4	TSS1500	shore	TSS1500-shore	chr11:126225355-126226073	#N/A	#N/A				down	6484
43387	STARD13	-0.108111	0.574845	-5.55651	3.2276e-07	5.25325e-05	5.2025	0.625039	0.516928	-0.108111	13	33780362	R	II	STARD13	TSS200	opensea	TSS200-opensea		#N/A	#N/A			rs78492733	down	90627
43763	STXBP6	-0.102236	0.318986	-4.66981	1.14348e-05	0.000384121	1.71926	0.366452	0.264216	-0.102236	14	25519778	F	II	STXBP6	TSS1500	shore	TSS1500-shore	chr14:25518424-25519612	TRUE	#N/A				down	29091
44013	SYNPO	-0.132803	0.630772	-6.44622	7.07585e-09	1.11443e-05	8.96568	0.692431	0.559628	-0.132803	5	150017204	R	II	SYNPO	Body	opensea	Body-opensea		TRUE	TRUE				down	11346
44191	TACC1	-0.136983	0.549193	-6.1222	2.90897e-08	1.87775e-05	7.57007	0.612792	0.475809	-0.136983	8	38615330	F	II	TACC1	5'UTR	shore	5'UTR-shore	chr8:38614414-38615236	TRUE	#N/A				down	6867
44207	TACC2	-0.101055	0.700498	-5.81367	1.09248e-07	3.23032e-05	6.26683	0.747417	0.646362	-0.101055	10	123886914	R	II	TACC2	Body	opensea	Body-opensea		TRUE	TRUE				down	10579
44271	TAGLN2	-0.145829	0.358243	-4.86276	5.39389e-06	0.000241415	2.44954	0.425949	0.280121	-0.145829	1	159893182	F	II	TAGLN2	5'UTR	shore	5'UTR-shore	chr1:159894329-159895398	#N/A	#N/A				down	8407
44316	TAP1	-0.100476	0.802123	-4.36126	3.6789e-05	0.000829227	0.588149	0.848773	0.748297	-0.100476	6	32820029	F	II	TAP1	Body	shore	Body-shore	chr6:32820849-32822370	#N/A	#N/A		rs72860339		down	6890
44574	TBL1XR1	-0.104628	0.62046	-4.42992	2.84693e-05	0.000695267	0.835778	0.669038	0.56441	-0.104628	3	176862885	F	II	TBL1XR1	5'UTR	opensea	5'UTR-opensea		#N/A	#N/A	low-CpG:178344951-178345723			down	79718
44684	TC2N	-0.111748	0.526015	-3.95346	0.000160955	0.00237161	-0.830569	0.577899	0.46615	-0.111748	14	92301922	R	II	TC2N	5'UTR	shore	5'UTR-shore	chr14:92302201-92303078	#N/A	#N/A				down	123036
44827	TDG	-0.102315	0.663921	-4.90686	4.53318e-06	0.000218721	2.61879	0.711425	0.609109	-0.102315	12	104363275	R	II	TDG	Body	shelf	Body-shelf	chr12:104359406-104360023	#N/A	#N/A				down	6996
44846	TDRD10	-0.104875	0.508618	-5.41693	5.76291e-07	7.01e-05	4.63403	0.557309	0.452435	-0.104875	1	154492947	R	II	TDRD10	Body	opensea	Body-opensea		#N/A	#N/A				down	126668
44858	TEAD1	-0.128256	0.509491	-5.14289	1.76558e-06	0.000127142	3.53856	0.569039	0.440782	-0.128256	11	12864037	F	II	TEAD1	Body	opensea	Body-opensea		#N/A	TRUE				down	7003
44989	TET1	-0.127156	0.571657	-4.44697	2.67053e-05	0.000665988	0.897611	0.630694	0.503537	-0.127156	10	70319645	R	II	TET1	TSS1500	shore	TSS1500-shore	chr10:70320130-70320822	TRUE	#N/A				down	80312
45132	TGFA	-0.11729	0.61975	-6.33502	1.15237e-08	1.35422e-05	8.48385	0.674206	0.556916	-0.11729	2	70751721	F	II	TGFA	Body	opensea	Body-opensea		TRUE	TRUE				down	7039
45149	TGFB2	-0.128148	0.631092	-4.90864	4.50153e-06	0.00021783	2.62561	0.690589	0.562441	-0.128148	1	218524558	F	II	TGFB2	Body	opensea	Body-opensea		#N/A	#N/A				down	7042
45372	TIAM1	-0.118946	0.538581	-4.00112	0.000136034	0.00209912	-0.669531	0.593806	0.47486	-0.118946	21	32931732	F	II	TIAM1	TSS1500	island	TSS1500-island	chr21:32929927-32932017	TRUE	#N/A	high-CpG:31853206-31853619			down	7074
45456	TINAGL1	-0.109944	0.45199	-4.44557	2.68457e-05	0.000668116	0.892541	0.503036	0.393092	-0.109944	1	32042161	F	II	TINAGL1	5'UTR	opensea	5'UTR-opensea		#N/A	TRUE				down	64129
45523	TLE3	-0.10414	0.642127	-4.14829	8.03357e-05	0.00143749	-0.164158	0.690477	0.586338	-0.10414	15	70354647	F	II	TLE3	Body	opensea	Body-opensea		TRUE	#N/A				down	7090
45771	TMEM109	-0.127608	0.440315	-4.98869	3.27691e-06	0.000180449	2.93501	0.499562	0.371954	-0.127608	11	60683046	R	II	TMEM109	5'UTR	shore	5'UTR-shore	chr11:60681552-60682268	#N/A	TRUE				down	79073
45790	TMEM125	-0.101191	0.543462	-4.94465	3.90358e-06	0.000199845	2.76445	0.590443	0.489253	-0.101191	1	43736290	F	II	TMEM125	5'UTR	shelf	5'UTR-shelf	chr1:43738484-43738829	#N/A	TRUE				down	128218
46036	TMEM51	-0.122726	0.43817	-6.23598	1.77539e-08	1.54496e-05	8.05717	0.495149	0.372424	-0.122726	1	15495100	F	II	TMEM51	5'UTR	opensea	5'UTR-opensea		TRUE	TRUE		rs78615461	rs41307800	down	55092
46059	TMEM63A	-0.123148	0.397024	-6.07732	3.53174e-08	2.00934e-05	7.37881	0.4542	0.331052	-0.123148	1	226065637	R	II	TMEM63A	5'UTR	shelf	5'UTR-shelf	chr1:226069605-226070898	TRUE	#N/A				down	9725
46108	TMEM87B	-0.102142	0.587178	-6.17435	2.32062e-08	1.72014e-05	7.79293	0.634601	0.53246	-0.102142	2	112814452	F	II	TMEM87B	Body	shore	Body-shore	chr2:112812827-112813614	#N/A	#N/A				down	84910
46155	TMPRSS2	-0.108726	0.363836	-3.93831	0.000169755	0.00246318	-0.88149	0.414316	0.30559	-0.108726	21	42880582	F	I	TMPRSS2	TSS1500	island	TSS1500-island	chr21:42878751-42880674	#N/A	#N/A		rs76833541		down	7113
46288	TNFRSF21	-0.15738	0.447592	-4.90869	4.50053e-06	0.000217817	2.62583	0.520661	0.363281	-0.15738	6	47210376	F	I	TNFRSF21	Body	opensea	Body-opensea		TRUE	TRUE				down	27242
46311	TNFRSF9	-0.128705	0.297881	-4.97572	3.4505e-06	0.000186019	2.88469	0.357637	0.228932	-0.128705	1	8001046	F	II	TNFRSF9	TSS200	shore	TSS200-shore	chr1:8002408-8002699	#N/A	#N/A			rs17848005	down	3604
46336	TNIK	-0.126761	0.582914	-5.09819	2.11415e-06	0.000140494	3.3626	0.641768	0.515007	-0.126761	3	171176016	F	II	TNIK	Body	shore	Body-shore	chr3:171177829-171178964	#N/A	#N/A		rs1565568		down	23043
46348	TNIP2	-0.106132	0.520804	-4.95178	3.79469e-06	0.000196613	2.79202	0.57008	0.463948	-0.106132	4	2748026	F	I	TNIP2	Body	opensea	Body-opensea		TRUE	#N/A				down	79155
46850	TRAF1	-0.115662	0.732403	-5.89338	7.77963e-08	2.74739e-05	6.60091	0.786103	0.670441	-0.115662	9	123688745	F	II	TRAF1	5'UTR	shelf	5'UTR-shelf	chr9:123690771-123691675	TRUE	TRUE				down	7185
47017	TRIB2	-0.124124	0.508664	-3.91215	0.000186037	0.00263456	-0.969059	0.566293	0.442169	-0.124124	2	12858912	R	I	TRIB2	Body	island	Body-island	chr2:12856625-12859019	#N/A	#N/A				down	28951
47039	TRIM11	-0.107213	0.366835	-4.91272	4.42949e-06	0.000215942	2.64133	0.416613	0.3094	-0.107213	1	228595062	F	II	TRIM11	TSS1500	shore	TSS1500-shore	chr1:228593811-228594713	#N/A	#N/A				down	81559
47087	TRIM2	-0.139873	0.318155	-5.93823	6.42215e-08	2.51445e-05	6.78969	0.383095	0.243223	-0.139873	4	154170822	F	I	TRIM2	Body	shore	Body-shore	chr4:154170368-154170600	#N/A	#N/A		rs6817018		down	23321
47307	TRIP10	-0.100301	0.475955	-4.35381	3.78213e-05	0.000845605	0.561438	0.522523	0.422222	-0.100301	19	6741049	F	II	TRIP10	Body	island	Body-island	chr19:6740669-6741203	#N/A	#N/A				down	9322
47313	TRIP4	-0.112189	0.820635	-6.19003	2.16795e-08	1.71588e-05	7.86006	0.872723	0.760534	-0.112189	15	64736348	F	II	TRIP4	Body	opensea	Body-opensea		TRUE	TRUE		rs57400052		down	9325
47431	TRPT1	-0.118555	0.414188	-6.60396	3.52793e-09	9.70136e-06	9.65384	0.469231	0.350676	-0.118555	11	63994308	F	II	TRPT1	TSS1500	shore	TSS1500-shore	chr11:63993589-63993834	#N/A	#N/A				down	83707
47450	TRPV6	-0.111758	0.708833	-4.05532	0.000112192	0.00182567	-0.484836	0.760721	0.648962	-0.111758	7	142583296	R	II	TRPV6	1stExon	opensea	1stExon-opensea		#N/A	TRUE				down	55503
47497	TSHZ2	-0.109884	0.803941	-5.23258	1.22735e-06	0.000104727	3.89396	0.854959	0.745074	-0.109884	20	51592177	F	II	TSHZ2	Body	shelf	Body-shelf	chr20:51589707-51590020	#N/A	#N/A			rs13039372	down	128553
47553	TSPAN18	-0.134464	0.662372	-6.00074	4.91156e-08	2.27121e-05	7.05381	0.724802	0.590338	-0.134464	11	44883965	F	II	TSPAN18	5'UTR	opensea	5'UTR-opensea		#N/A	TRUE				down	90139
47706	TTC39C	-0.102633	0.56459	-5.19731	1.41654e-06	0.000113214	3.75379	0.612241	0.509609	-0.102633	18	21656374	F	II	TTC39C	Body	opensea	Body-opensea		TRUE	TRUE				down	125488
47787	TTLL7	-0.101372	0.634248	-5.6555	2.13188e-07	4.3657e-05	5.60968	0.681313	0.579941	-0.101372	1	84462335	R	II	TTLL7	5'UTR	shore	5'UTR-shore	chr1:84464223-84465232	#N/A	#N/A				down	79739
47842	TTYH3	-0.11704	0.33668	-3.94895	0.000163525	0.00239758	-0.845726	0.39102	0.27398	-0.11704	7	2672989	R	II	TTYH3	Body	shore	Body-shore	chr7:2671156-2671937	#N/A	#N/A				down	80727
47875	TUBB	-0.109556	0.538285	-6.58935	3.76353e-09	9.74916e-06	9.58989	0.589151	0.479595	-0.109556	6	30687221	R	II	TUBB	TSS1500	shore	TSS1500-shore	chr6:30687941-30688213	#N/A	#N/A				down	203068
48043	UBD	-0.106795	0.671304	-3.60923	0.000523169	0.00568905	-1.95327	0.720887	0.614092	-0.106795	6	29527870	R	II	UBD	TSS200	opensea	TSS200-opensea		#N/A	#N/A				down	10537
48114	UBE2Z	-0.17729	0.728193	-5.95472	5.98406e-08	2.45115e-05	6.85927	0.810506	0.633216	-0.17729	17	46993161	R	II	UBE2Z	Body	opensea	Body-opensea		TRUE	TRUE				down	65264
48339	UNC13D	-0.11973	0.443542	-4.05734	0.000111388	0.00181616	-0.477932	0.499131	0.379401	-0.11973	17	73840822	R	II	UNC13D	TSS200	opensea	TSS200-opensea		#N/A	TRUE				down	201294
48418	UOX	-0.10086	0.720928	-4.93956	3.98305e-06	0.000202232	2.74482	0.767756	0.666896	-0.10086	1	84831593	R	II	UOX	Body	opensea	Body-opensea		TRUE	TRUE				down	391051
48605	UTRN	-0.123593	0.700903	-4.56618	1.70098e-05	0.000495686	1.33418	0.758286	0.634693	-0.123593	6	144904561	R	II	UTRN	Body	opensea	Body-opensea		#N/A	TRUE				down	7402
48832	VIM	-0.106547	0.256265	-4.99806	3.15681e-06	0.000176775	2.97142	0.305733	0.199187	-0.106547	10	17270087	R	II	VIM	TSS200	shore	TSS200-shore	chr10:17270430-17272617	TRUE	#N/A				down	7431
49241	WDSUB1	-0.137181	0.543488	-3.92958	0.000175028	0.00251841	-0.910741	0.607179	0.469998	-0.137181	2	160106670	F	II	WDSUB1	Body	opensea	Body-opensea		#N/A	TRUE				down	151525
49664	XYLT1	-0.126209	0.629623	-4.63303	1.31724e-05	0.000420208	1.58201	0.68822	0.562012	-0.126209	16	17458534	R	II	XYLT1	Body	opensea	Body-opensea		#N/A	TRUE				down	64131
49851	ZBTB38	-0.106381	0.605028	-3.73775	0.000339472	0.00411344	-1.54259	0.654419	0.548038	-0.106381	3	141087190	R	I	ZBTB38	5'UTR	opensea	5'UTR-opensea		TRUE	TRUE	low-CpG:142569812-142570106			down	253461
49911	ZC3H12A	-0.107352	0.650299	-5.21836	1.30044e-06	0.000108016	3.8374	0.700141	0.59279	-0.107352	1	37941263	F	II	ZC3H12A	Body	shore	Body-shore	chr1:37939723-37940650	#N/A	TRUE				down	80149
49969	ZC3H4	-0.124515	0.576716	-6.17022	2.36266e-08	1.72793e-05	7.77521	0.634527	0.510011	-0.124515	19	47614071	R	II	ZC3H4	Body	shore	Body-shore	chr19:47614408-47614661	#N/A	#N/A			rs55798223	down	23211
50159	ZFP1	-0.109973	0.56314	-4.62459	1.36059e-05	0.000429494	1.5506	0.614199	0.504226	-0.109973	16	75183231	R	II	ZFP1	5'UTR	shore	5'UTR-shore	chr16:75182243-75182846	#N/A	#N/A				down	162239
50241	ZFYVE28	-0.11206	0.506872	-5.52185	3.72935e-07	5.63474e-05	5.06073	0.5589	0.44684	-0.11206	4	2395549	F	II	ZFYVE28	Body	opensea	Body-opensea		#N/A	TRUE				down	57732
50271	ZIC1	-0.134031	0.485431	-4.48756	2.29192e-05	0.000603301	1.04548	0.54766	0.413629	-0.134031	3	147133884	F	II	ZIC1	3'UTR	shelf	3'UTR-shelf	chr3:147136903-147137328	#N/A	#N/A				down	7545
50316	ZIC4	-0.112684	0.511103	-3.91951	0.000181312	0.002585	-0.944466	0.56342	0.450736	-0.112684	3	147113700	R	II	ZIC4	Body	island	Body-island	chr3:147113608-147114479	#N/A	TRUE				down	84107
50498	ZNF254	-0.146266	0.58486	-5.2126	1.33128e-06	0.000109319	3.81448	0.652769	0.506503	-0.146266	19	24269890	R	II	ZNF254	TSS200	opensea	TSS200-opensea		#N/A	#N/A	low-CpG:24061717-24061901			down	9534
50507	ZNF267	-0.126598	0.559141	-5.23765	1.2023e-06	0.000103577	3.91412	0.617919	0.491321	-0.126598	16	31891978	F	II	ZNF267	Body	opensea	Body-opensea		#N/A	TRUE				down	10308
50528	ZNF296	-0.119646	0.410387	-5.06079	2.45671e-06	0.000152406	3.21602	0.465937	0.346291	-0.119646	19	45578863	F	II	ZNF296	Body	shore	Body-shore	chr19:45579321-45580018	#N/A	#N/A	low-CpG:50270703-50270775			down	162979
50583	ZNF365	-0.14795	0.671257	-5.23136	1.23349e-06	0.000104992	3.88908	0.739948	0.591998	-0.14795	10	64193068	R	II	ZNF365	Body	opensea	Body-opensea		#N/A	TRUE				down	22891
50840	ZNF609	-0.109374	0.411456	-7.25895	1.87588e-10	3.55072e-06	12.5617	0.462237	0.352863	-0.109374	15	64799784	F	II	ZNF609	Body	opensea	Body-opensea		#N/A	TRUE				down	23060
37	AAMP	0.102949	0.527313	6.25551	1.63064e-08	1.50024e-05	8.14111	0.479515	0.582464	0.102949	2	219133847	F	II	AAMP	Body	shore	Body-shore	chr2:219134787-219135393	#N/A	#N/A				up	14
72	ABCA1	0.119958	0.405903	5.18799	1.47107e-06	0.00011541	3.71687	0.350208	0.470166	0.119958	9	107687761	F	II	ABCA1	5'UTR	shore	5'UTR-shore	chr9:107688769-107689046	#N/A	#N/A				up	19
79	ABCA2	0.165666	0.594031	6.83941	1.23798e-09	7.09228e-06	10.6905	0.517115	0.682781	0.165666	9	139916869	R	II	ABCA2	Body	shore	Body-shore	chr9:139917178-139917492	#N/A	#N/A				up	20
181	ABCC5	0.135962	0.475409	5.38649	6.53434e-07	7.4613e-05	4.51095	0.412284	0.548246	0.135962	3	183702886	F	II	ABCC5	Body	opensea	Body-opensea		#N/A	TRUE				up	10057
207	ABCF3	0.101593	0.241704	5.20993	1.34576e-06	0.000109899	3.8039	0.194536	0.296129	0.101593	3	183903315	R	II	ABCF3	TSS1500	shore	TSS1500-shore	chr3:183903386-183904495	#N/A	#N/A				up	55324
367	ABR	0.10762	0.716236	5.86758	8.68481e-08	2.87736e-05	6.49259	0.66627	0.77389	0.10762	17	1064210	F	II	ABR	Body	island	Body-island	chr17:1063942-1064304	#N/A	#N/A				up	29
462	ACACB	0.141284	0.584714	5.89801	7.62731e-08	2.72581e-05	6.62038	0.519117	0.660401	0.141284	12	109684116	R	II	ACACB	Body	opensea	Body-opensea		#N/A	#N/A				up	32
469	ACAD8	0.101073	0.612236	5.71354	1.66945e-07	3.91705e-05	5.84991	0.56531	0.666382	0.101073	11	134126364	R	II	ACAD8	Body	shelf	Body-shelf	chr11:134122762-134122981	#N/A	#N/A				up	27034
484	ACADS	0.122636	0.482937	5.57149	3.03185e-07	5.11903e-05	5.2639	0.425998	0.548635	0.122636	12	121164371	F	I	ACADS	Body	shore	Body-shore	chr12:121163472-121163913	#N/A	#N/A				up	35
608	ACSF2	0.143144	0.340938	5.71849	1.6349e-07	3.86234e-05	5.87046	0.274478	0.417622	0.143144	17	48545950	R	I	ACSF2	Body	island	Body-island	chr17:48545570-48546900	#N/A	TRUE				up	80221
626	ACSL1	0.1135	0.749415	4.92426	4.23184e-06	0.000209555	2.68579	0.696718	0.810218	0.1135	4	185721490	F	II	ACSL1	Body	shelf	Body-shelf	chr4:185724434-185724647	#N/A	#N/A				up	2180
642	ACSL3	0.105779	0.275369	4.81359	6.54166e-06	0.000270976	2.26184	0.226257	0.332036	0.105779	2	223757281	R	II	ACSL3	5'UTR	opensea	5'UTR-opensea		#N/A	TRUE			rs78230197	up	2181
646	ACSL5	0.112178	0.708403	5.79522	1.18149e-07	3.32205e-05	6.18979	0.65632	0.768499	0.112178	10	114133304	R	II	ACSL5	TSS1500	opensea	TSS1500-opensea		#N/A	#N/A				up	51703
677	ACSS2	0.111475	0.57337	5.76452	1.34571e-07	3.50314e-05	6.06181	0.521614	0.633089	0.111475	20	33468207	R	II	ACSS2	Body	shelf	Body-shelf	chr20:33464156-33464645	#N/A	#N/A				up	55902
751	ACVR2B	0.127959	0.615605	5.59869	2.70571e-07	4.85664e-05	5.37561	0.556196	0.684155	0.127959	3	38501099	R	II	ACVR2B	Body	shelf	Body-shelf	chr3:38495088-38497151	TRUE	#N/A				up	93
757	ACY1	0.10119	0.507345	5.47763	4.48217e-07	6.16563e-05	4.8804	0.460364	0.561554	0.10119	3	52018129	F	II	ACY1	Body	shore	Body-shore	chr3:52017056-52017592	#N/A	#N/A		rs34017492		up	95
964	ADAP1	0.100598	0.652599	5.86541	8.7656e-08	2.8902e-05	6.48347	0.605893	0.706491	0.100598	7	966081	F	I	ADAP1	Body	island	Body-island	chr7:965987-966266	#N/A	#N/A				up	11033
1018	ADCY1	0.140522	0.61869	5.02945	2.78514e-06	0.000163865	3.09359	0.553447	0.69397	0.140522	7	45761429	F	II	ADCY1	3'UTR	opensea	3'UTR-opensea		#N/A	#N/A				up	107
1026	ADCY10	0.117689	0.516641	6.47402	6.26122e-09	1.09578e-05	9.08657	0.462	0.579689	0.117689	1	167882440	F	II	ADCY10	5'UTR	opensea	5'UTR-opensea		#N/A	TRUE				up	55811
1131	ADI1	0.152451	0.454989	5.45105	5.00442e-07	6.52982e-05	4.77235	0.384209	0.536659	0.152451	2	3521258	R	II	ADI1	Body	shore	Body-shore	chr2:3522270-3523617	#N/A	#N/A				up	55256
1372	AGAP3	0.18493	0.293762	4.92939	4.14678e-06	0.000206953	2.70557	0.207902	0.392832	0.18493	7	150786082	F	I	AGAP3	Body	shore	Body-shore	chr7:150783480-150785040	TRUE	TRUE				up	116988
1404	AGL	0.109146	0.534918	5.55506	3.24715e-07	5.27104e-05	5.19658	0.484243	0.593389	0.109146	1	100335651	R	II	AGL	Body	opensea	Body-opensea		#N/A	TRUE				up	178
1502	AHCY	0.130865	0.614256	4.97569	3.45088e-06	0.000186019	2.88459	0.553497	0.684363	0.130865	20	32893975	R	II	AHCY	5'UTR	shelf	5'UTR-shelf	chr20:32890559-32891378	#N/A	#N/A				up	191
1693	AKAP13	0.122321	0.526024	4.50738	2.1265e-05	0.000573407	1.11797	0.469232	0.591553	0.122321	15	86186011	R	II	AKAP13	Body	opensea	Body-opensea		#N/A	TRUE				up	11214
1707	AKAP9	0.102479	0.771275	5.94024	6.36697e-08	2.50381e-05	6.79819	0.723695	0.826175	0.102479	7	91603056	F	II	AKAP9	Body	opensea	Body-opensea		#N/A	#N/A	low-CpG:91440990-91440999			up	10142
1722	AKR1C2	0.105999	0.644056	4.87636	5.1128e-06	0.000233988	2.50163	0.594842	0.700841	0.105999	10	5044992	F	II	AKR1C2	Body	opensea	Body-opensea		#N/A	#N/A				up	1646
1729	AKR1D1	0.167303	0.575344	6.27048	1.52763e-08	1.46199e-05	8.20552	0.497668	0.664971	0.167303	7	137761289	R	II	AKR1D1	1stExon	opensea	1stExon-opensea		#N/A	#N/A				up	6718
1761	ALAS1	0.119742	0.372431	6.73873	1.9395e-09	7.54722e-06	10.2459	0.316836	0.436578	0.119742	3	52235959	F	II	ALAS1	Body	shelf	Body-shelf	chr3:52231942-52232541	#N/A	#N/A		rs35952977		up	211
1813	ALDH2	0.185297	0.623196	5.71527	1.65732e-07	3.89969e-05	5.85707	0.537166	0.722462	0.185297	12	112220997	R	I	ALDH2	Body	opensea	Body-opensea		#N/A	#N/A				up	217
1857	ALDH7A1	0.100825	0.607982	4.42346	2.91671e-05	0.000706992	0.812376	0.561171	0.661995	0.100825	5	125929132	F	II	ALDH7A1	Body	shore	Body-shore	chr5:125930601-125931049	#N/A	TRUE				up	501
1922	ALOX5	0.116329	0.425063	4.16314	7.61331e-05	0.00138468	-0.112509	0.371053	0.487382	0.116329	10	45923374	F	II	ALOX5	Body	island	Body-island	chr10:45922831-45923375	#N/A	#N/A				up	240
1955	ALPL	0.110754	0.419545	5.68694	1.86764e-07	4.11709e-05	5.73968	0.368124	0.478878	0.110754	1	21877322	R	II	ALPL	5'UTR	opensea	5'UTR-opensea		#N/A	#N/A				up	249
1993	AMACR	0.114345	0.663049	5.58768	2.83335e-07	4.94374e-05	5.33037	0.60996	0.724305	0.114345	5	34005493	F	II	AMACR	Body	shelf	Body-shelf	chr5:34007796-34008105	#N/A	#N/A		rs1501695		up	23600
2093	ANG	0.10269	0.492186	6.14401	2.64696e-08	1.79576e-05	7.66315	0.444509	0.547199	0.10269	14	21161619	F	II	ANG	5'UTR	opensea	5'UTR-opensea		#N/A	#N/A				up	283
2164	ANKAR	0.135385	0.736807	6.1777	2.28719e-08	1.72014e-05	7.80724	0.67395	0.809335	0.135385	2	190563594	F	II	ANKAR	Body	opensea	Body-opensea		#N/A	#N/A				up	150709
2240	ANKRD16	0.122825	0.318247	4.3033	4.55986e-05	0.000965284	0.38104	0.261222	0.384046	0.122825	10	5930543	F	II	ANKRD16	Body	shore	Body-shore	chr10:5930914-5932389	#N/A	#N/A		rs6602322		up	54522
2245	ANKRD22	0.105195	0.511289	5.97259	5.54264e-08	2.37505e-05	6.93474	0.462448	0.567643	0.105195	10	90612228	R	II	ANKRD22	TSS1500	opensea	TSS1500-opensea		#N/A	#N/A				up	118932
2269	ANKRD33B	0.126981	0.534094	4.75616	8.18475e-06	0.000311789	2.04399	0.475139	0.602119	0.126981	5	10650351	F	II	ANKRD33B	3'UTR	island	3'UTR-island	chr5:10649367-10650352	#N/A	#N/A		rs78136092		up	651746
2314	ANKRD55	0.119494	0.315338	5.24029	1.18945e-06	0.000102797	3.92464	0.259858	0.379353	0.119494	5	55412572	R	I	ANKRD55	1stExon	opensea	1stExon-opensea		#N/A	#N/A				up	79722
2512	AP1S1	0.113058	0.565122	5.64725	2.20705e-07	4.41912e-05	5.57564	0.512631	0.625689	0.113058	7	100800362	R	II	AP1S1	Body	shore	Body-shore	chr7:100797532-100798479	#N/A	#N/A				up	1174
2529	AP2B1	0.101457	0.676793	5.13627	1.81346e-06	0.000128769	3.51242	0.629688	0.731145	0.101457	17	33993210	R	II	AP2B1	Body	opensea	Body-opensea		#N/A	TRUE				up	163
2532	AP3B1	0.100814	0.499827	4.77683	7.55163e-06	0.000296291	2.12224	0.453021	0.553835	0.100814	5	77306302	R	II	AP3B1	Body	opensea	Body-opensea		#N/A	TRUE				up	8546
2663	APLP2	0.128194	0.613615	6.48051	6.08502e-09	1.09578e-05	9.11479	0.554097	0.682291	0.128194	11	129984345	F	II	APLP2	Body	opensea	Body-opensea		#N/A	TRUE				up	334
2689	APOA5	0.112319	0.612328	5.78491	1.23432e-07	3.37916e-05	6.14677	0.560179	0.672499	0.112319	11	116661100	R	II	APOA5	Body	island	Body-island	chr11:116661034-116661410	#N/A	#N/A				up	116519
2761	APOF	0.100924	0.532595	5.66624	2.03773e-07	4.28161e-05	5.65405	0.485738	0.586662	0.100924	12	56755499	F	II	APOF	Body	shore	Body-shore	chr12:56753861-56754323	#N/A	#N/A				up	319
2784	APOM	0.105964	0.448814	5.59116	2.79241e-07	4.92137e-05	5.34465	0.399616	0.50558	0.105964	6	31623842	R	II	APOM	1stExon	shelf	1stExon-shelf	chr6:31619856-31620525	#N/A	#N/A				up	55937
2884	ARG1	0.103926	0.509927	5.89227	7.81671e-08	2.75106e-05	6.59623	0.461676	0.565601	0.103926	6	131894023	F	II	ARG1	TSS1500	opensea	TSS1500-opensea		#N/A	#N/A				up	383
2979	ARHGAP27	0.10229	0.580419	5.48687	4.31335e-07	6.03315e-05	4.91804	0.532927	0.635218	0.10229	17	43483251	F	I	ARHGAP27	1stExon	island	1stExon-island	chr17:43483097-43483454	TRUE	TRUE				up	201176
3032	ARHGEF10	0.144011	0.530318	4.77665	7.55713e-06	0.00029645	2.12153	0.463456	0.607467	0.144011	8	1896553	R	II	ARHGEF10	Body	shelf	Body-shelf	chr8:1893696-1894083	#N/A	#N/A				up	9639
3141	ARHGEF18	0.108715	0.69941	5.63147	2.3583e-07	4.57445e-05	5.51055	0.648935	0.75765	0.108715	19	7529920	R	II	ARHGEF18	Body	shore	Body-shore	chr19:7531810-7532669	#N/A	#N/A				up	23370
3178	ARHGEF4	0.100032	0.645236	5.36035	7.27685e-07	7.91994e-05	4.40553	0.598793	0.698825	0.100032	2	131688463	F	II	ARHGEF4	5'UTR	opensea	5'UTR-opensea		#N/A	#N/A				up	50649
3193	ARID1A	0.12989	0.636282	6.37934	9.49079e-09	1.26002e-05	8.67555	0.575976	0.705866	0.12989	1	27108185	F	II	ARID1A	3'UTR	opensea	3'UTR-opensea		#N/A	TRUE				up	8289
3207	ARID1B	0.12455	0.558309	6.09697	3.24434e-08	1.97394e-05	7.46248	0.500482	0.625032	0.12455	6	157284510	F	II	ARID1B	Body	opensea	Body-opensea		#N/A	TRUE				up	57492
3248	ARID5B	0.114507	0.530066	6.67238	2.60479e-09	8.78124e-06	9.954	0.476902	0.591409	0.114507	10	63770415	F	II	ARID5B	Body	opensea	Body-opensea		#N/A	TRUE				up	84159
3268	ARL15	0.124516	0.503064	4.33306	4.0847e-05	0.000893404	0.487174	0.445253	0.569769	0.124516	5	53516701	F	II	ARL15	Body	opensea	Body-opensea		#N/A	TRUE				up	54622
3288	ARL4D	0.106399	0.412006	5.14995	1.71594e-06	0.000125447	3.56642	0.362606	0.469006	0.106399	17	41477948	R	II	ARL4D	3'UTR	shore	3'UTR-shore	chr17:41476220-41476715	#N/A	#N/A				up	379
3395	ARSB	0.114608	0.420288	6.11297	3.02757e-08	1.90057e-05	7.53066	0.367077	0.481685	0.114608	5	78126647	F	II	ARSB	Body	opensea	Body-opensea		#N/A	TRUE				up	411
3405	ARSJ	0.108124	0.379276	6.24863	1.68021e-08	1.51322e-05	8.11155	0.329076	0.4372	0.108124	4	114873079	R	II	ARSJ	Body	opensea	Body-opensea		#N/A	TRUE				up	79642
3476	ASB13	0.125952	0.657168	6.24714	1.69116e-08	1.51976e-05	8.10514	0.59869	0.724643	0.125952	10	5690914	F	II	ASB13	Body	opensea	Body-opensea		#N/A	#N/A		rs61729425		up	79754
3555	ASGR1	0.105408	0.291588	4.02477	0.000125091	0.00197715	-0.589174	0.242648	0.348056	0.105408	17	7077709	F	II	ASGR1	Body	island	Body-island	chr17:7077021-7077888	TRUE	#N/A		rs34809354		up	432
3561	ASGR2	0.145158	0.460873	5.75816	1.38249e-07	3.54707e-05	6.0353	0.393478	0.538636	0.145158	17	7019284	R	II	ASGR2	TSS1500	opensea	TSS1500-opensea		#N/A	#N/A				up	433
3574	ASPA	0.102789	0.47484	5.2465	1.15972e-06	0.000101287	3.94939	0.427116	0.529905	0.102789	17	3377250	F	II	ASPA	TSS200	shelf	TSS200-shelf	chr17:3375006-3375237	#N/A	#N/A				up	443
3595	ASPH	0.123673	0.595498	5.64532	2.22505e-07	4.4329e-05	5.56766	0.538078	0.661751	0.123673	8	62568172	R	II	ASPH	Body	opensea	Body-opensea		#N/A	TRUE				up	444
3608	ASPSCR1	0.142074	0.620334	5.42493	5.57553e-07	6.89289e-05	4.66643	0.554371	0.696445	0.142074	17	79936561	R	II	ASPSCR1	Body	shore	Body-shore	chr17:79935137-79936051	#N/A	#N/A				up	79058
3702	ATG5	0.106959	0.488527	5.66962	2.00896e-07	4.24894e-05	5.66801	0.438867	0.545826	0.106959	6	106709978	R	II	ATG5	Body	opensea	Body-opensea		#N/A	TRUE				up	9474
3721	ATL2	0.104528	0.622482	5.50329	4.02894e-07	5.84549e-05	4.98494	0.573951	0.678479	0.104528	2	38602546	R	II	ATL2	Body	shore	Body-shore	chr2:38603569-38604510	#N/A	#N/A				up	64225
3729	ATN1	0.115414	0.605998	5.28265	1.00066e-06	9.35732e-05	4.09371	0.552413	0.667827	0.115414	12	7033146	F	II	ATN1	TSS1500	shelf	TSS1500-shelf	chr12:7036955-7037924	#N/A	#N/A		rs7310420		up	1822
4102	AXIN2	0.131377	0.335233	5.05192	2.54565e-06	0.000155687	3.18131	0.274237	0.405614	0.131377	17	63550766	F	II	AXIN2	Body	opensea	Body-opensea		#N/A	TRUE		rs9895291		up	8313
4186	B3GNT9	0.106043	0.5134	5.10103	2.09015e-06	0.000139439	3.37374	0.464166	0.570209	0.106043	16	67183725	F	II	B3GNT9	Body	island	Body-island	chr16:67183208-67184968	#N/A	#N/A				up	84752
4243	BAALC	0.106885	0.602584	6.33662	1.14435e-08	1.35376e-05	8.49075	0.552959	0.659844	0.106885	8	104154149	F	II	BAALC	Body	shore	Body-shore	chr8:104152726-104153390	#N/A	#N/A				up	79870
4258	BACH1	0.100428	0.3771	5.14383	1.75891e-06	0.000126888	3.54225	0.330473	0.4309	0.100428	21	30670416	F	II	BACH1	TSS1500	shore	TSS1500-shore	chr21:30670744-30671786	#N/A	#N/A				up	571
4340	BAIAP2	0.123872	0.698737	4.89649	4.72267e-06	0.000223788	2.57891	0.641225	0.765097	0.123872	17	79058333	R	I	BAIAP2	Body	opensea	Body-opensea		#N/A	#N/A				up	10458
4354	BAIAP2L1	0.106971	0.610722	4.22107	6.16691e-05	0.00119196	0.0901845	0.561056	0.668027	0.106971	7	97923799	F	I	BAIAP2L1	Body	opensea	Body-opensea		#N/A	TRUE				up	55971
4476	BCAT2	0.109685	0.44992	4.89621	4.72796e-06	0.000223903	2.57782	0.398994	0.50868	0.109685	19	49313421	F	II	BCAT2	Body	shore	Body-shore	chr19:49314097-49314434	#N/A	#N/A				up	587
4548	BCL6	0.119852	0.527342	5.85574	9.13432e-08	2.92179e-05	6.44293	0.471696	0.591548	0.119852	3	187453520	R	II	BCL6	5'UTR	shore	5'UTR-shore	chr3:187455330-187455843	#N/A	#N/A				up	604
4612	BDKRB2	0.102282	0.738131	4.87706	5.09871e-06	0.000233686	2.50432	0.690643	0.792925	0.102282	14	96686415	R	II	BDKRB2	5'UTR	opensea	5'UTR-opensea		#N/A	TRUE				up	624
4698	BHMT	0.109946	0.584026	5.06745	2.392e-06	0.000150074	3.24206	0.532979	0.642925	0.109946	5	78406928	R	II	BHMT	TSS1500	opensea	TSS1500-opensea		#N/A	#N/A				up	635
4761	BIN1	0.111733	0.517086	4.35189	3.80922e-05	0.000849728	0.55455	0.46521	0.576943	0.111733	2	127818000	R	I	BIN1	Body	island	Body-island	chr2:127817994-127818231	#N/A	#N/A				up	274
4930	BOP1	0.11816	0.410949	4.76234	7.99033e-06	0.000307134	2.06735	0.356089	0.474249	0.11816	8	145501862	F	II	BOP1	Body	shore	Body-shore	chr8:145501984-145502298	#N/A	#N/A			rs59204387	up	23246
4953	BPTF	0.111305	0.744971	5.73014	1.55642e-07	3.76095e-05	5.91881	0.693294	0.804599	0.111305	17	65850328	R	II	BPTF	Body	opensea	Body-opensea		#N/A	#N/A	low-CpG:63280766-63281308			up	2186
4961	BRCA1	0.125846	0.568542	5.61394	2.53824e-07	4.70763e-05	5.43834	0.510113	0.635959	0.125846	17	41196368	F	II	BRCA1	3'UTR	opensea	3'UTR-opensea		#N/A	#N/A		rs12516		up	672
5001	BRF1	0.10737	0.432575	7.11199	3.64288e-10	4.4237e-06	11.9032	0.382725	0.490095	0.10737	14	105751629	R	II	BRF1	Body	opensea	Body-opensea		#N/A	#N/A				up	2972
5129	BTD	0.116557	0.615412	5.63311	2.34216e-07	4.56233e-05	5.51729	0.561296	0.677853	0.116557	3	15641908	R	II	BTD	TSS1500	shore	TSS1500-shore	chr3:15642770-15643581	#N/A	#N/A				up	686
5178	BTRC	0.122142	0.385323	3.81256	0.000262807	0.00339867	-1.29883	0.328614	0.450756	0.122142	10	103245720	F	I	BTRC	Body	opensea	Body-opensea		#N/A	#N/A				up	8945
5179	BUB1	0.105692	0.48042	5.21407	1.32331e-06	0.000109015	3.82035	0.431349	0.537041	0.105692	2	111424914	F	II	BUB1	Body	opensea	Body-opensea		#N/A	TRUE				up	699
5442	C1orf52	0.11159	0.312189	6.29379	1.37986e-08	1.42246e-05	8.30595	0.260379	0.37197	0.11159	1	85721327	F	II	C1orf52	Body	shelf	Body-shelf	chr1:85724701-85725524	#N/A	#N/A				up	148423
5469	C1QL1	0.109872	0.410605	4.04611	0.000115939	0.00187005	-0.516341	0.359593	0.469465	0.109872	17	43037114	R	I	C1QL1	3'UTR	shore	3'UTR-shore	chr17:43037166-43037740	#N/A	TRUE				up	10882
5479	C1QL3	0.100502	0.649012	4.00282	0.00013522	0.00208922	-0.663781	0.60235	0.702852	0.100502	10	16561393	F	II	C1QL3	Body	shore	Body-shore	chr10:16561604-16563822	#N/A	#N/A		rs11283047		up	389941
5489	C1QTNF1	0.119896	0.364706	4.77458	7.61818e-06	0.000298051	2.11371	0.30904	0.428936	0.119896	17	77042810	R	II	C1QTNF1	Body	shore	Body-shore	chr17:77043741-77044489	#N/A	#N/A				up	114897
5577	C2CD4D	0.130915	0.239252	3.49911	0.000752223	0.00748072	-2.29678	0.17847	0.309385	0.130915	1	151810899	R	I	C2CD4D	Body	island	Body-island	chr1:151810460-151811684	#N/A	#N/A	high-CpG:150077310-150077568			up	100191040
5592	C2orf76	0.1279	0.613919	4.3617	3.67287e-05	0.000828497	0.589732	0.554537	0.682437	0.1279	2	120063914	R	II	C2orf76	Body	opensea	Body-opensea		#N/A	#N/A			rs75963540	up	130355
5639	C4BPA	0.107319	0.526671	5.60914	2.58981e-07	4.75866e-05	5.4186	0.476844	0.584163	0.107319	1	207277018	F	II	C4BPA	TSS1500	opensea	TSS1500-opensea		#N/A	#N/A				up	722
5762	C7orf50	0.100789	0.440831	4.72594	9.20407e-06	0.000336111	1.92995	0.394036	0.494825	0.100789	7	1135747	F	I	C7orf50	Body	island	Body-island	chr7:1135744-1135992	#N/A	#N/A		rs55689421		up	84310
6002	CACNA1H	0.152637	0.573801	5.07205	2.34827e-06	0.000148698	3.26007	0.502934	0.655571	0.152637	16	1234809	R	I	CACNA1H	Body	shore	Body-shore	chr16:1235938-1237262	#N/A	#N/A				up	8912
6072	CACNB1	0.117863	0.517766	5.98996	5.14444e-08	2.32419e-05	7.00817	0.463044	0.580907	0.117863	17	37331531	F	I	CACNB1	Body	island	Body-island	chr17:37331425-37331629	#N/A	#N/A				up	782
6086	CACNB3	0.114314	0.71576	5.9773	5.43183e-08	2.36096e-05	6.95463	0.662686	0.777	0.114314	12	49211029	R	II	CACNB3	TSS1500	shore	TSS1500-shore	chr12:49212162-49212642	#N/A	#N/A				up	784
6460	CAPZB	0.138327	0.616415	5.7734	1.29607e-07	3.45248e-05	6.09877	0.552192	0.690519	0.138327	1	19665757	F	I	CAPZB	3'UTR	shore	3'UTR-shore	chr1:19665010-19665276	#N/A	TRUE				up	832
7222	CD14	0.114344	0.491905	5.48137	4.41313e-07	6.11571e-05	4.89562	0.438817	0.553161	0.114344	5	140014002	F	II	CD14	TSS1500	shore	TSS1500-shore	chr5:140011482-140012739	#N/A	#N/A		rs77590806		up	929
7338	CD36	0.104409	0.445331	6.59691	3.6396e-09	9.74916e-06	9.62301	0.396856	0.501265	0.104409	7	80275870	F	II	CD36	5'UTR	opensea	5'UTR-opensea		#N/A	#N/A				up	948
7643	CDCP1	0.109224	0.614657	4.99431	3.20433e-06	0.00017825	2.95685	0.563946	0.67317	0.109224	3	45134300	R	II	CDCP1	Body	opensea	Body-opensea		TRUE	TRUE			rs6783273	up	64866
7719	CDH23	0.122169	0.614115	5.09757	2.11946e-06	0.000140688	3.36015	0.557394	0.679563	0.122169	10	73335297	R	II	CDH23	Body	opensea	Body-opensea		#N/A	TRUE				up	64072
7817	CDK6	0.148594	0.599558	6.82301	1.33203e-09	7.28955e-06	10.618	0.530568	0.679162	0.148594	7	92412319	R	II	CDK6	Body	opensea	Body-opensea		#N/A	TRUE				up	1021
7883	CDO1	0.123125	0.592957	6.37055	9.86381e-09	1.27543e-05	8.63747	0.535792	0.658917	0.123125	5	115152938	F	II	CDO1	TSS1500	shore	TSS1500-shore	chr5:115151348-115152713	#N/A	#N/A		rs77222842		up	1036
8015	CEP68	0.108796	0.340339	4.81687	6.45814e-06	0.000269077	2.27433	0.289827	0.398623	0.108796	2	65302557	R	I	CEP68	Body	opensea	Body-opensea		#N/A	#N/A				up	23177
8021	CEP70	0.105222	0.403887	5.64691	2.2102e-07	4.41912e-05	5.57424	0.355034	0.460256	0.105222	3	138312356	F	II	CEP70	5'UTR	shore	5'UTR-shore	chr3:138312980-138313342	#N/A	#N/A		rs79248012		up	80321
8062	CFDP1	0.111544	0.459474	5.42698	5.5284e-07	6.86235e-05	4.67475	0.407686	0.51923	0.111544	16	75406896	F	II	CFDP1	Body	opensea	Body-opensea		#N/A	TRUE				up	10428
8067	CFHR3	0.104843	0.633114	3.81918	0.00025688	0.00334136	-1.27708	0.584437	0.68928	0.104843	1	196746875	R	I	CFHR3	Body	opensea	Body-opensea		#N/A	#N/A				up	10878
8070	CFHR5	0.102279	0.351348	4.66921	1.1461e-05	0.00038472	1.71703	0.303861	0.406141	0.102279	1	196945530	R	II	CFHR5	TSS1500	opensea	TSS1500-opensea		#N/A	#N/A				up	81494
8074	CFL2	0.154908	0.408424	6.0192	4.53688e-08	2.19745e-05	7.13199	0.336503	0.49141	0.154908	14	35184556	R	II	CFL2	TSS1500	shore	TSS1500-shore	chr14:35183385-35184196	#N/A	#N/A				up	1073
8108	CHAC1	0.119115	0.669804	4.75988	8.06706e-06	0.000309133	2.05806	0.614501	0.733616	0.119115	15	41244615	R	II	CHAC1	TSS1500	shore	TSS1500-shore	chr15:41244885-41246004	#N/A	#N/A				up	79094
8120	CHCHD5	0.125124	0.630772	6.06375	3.74466e-08	2.05673e-05	7.32111	0.572679	0.697803	0.125124	2	113346566	R	II	CHCHD5	3'UTR	opensea	3'UTR-opensea		#N/A	#N/A				up	84269
8183	CHERP	0.161	0.65057	7.67595	2.81595e-11	2.22776e-06	14.4458	0.575821	0.73682	0.161	19	16637309	R	II	CHERP	Body	shore	Body-shore	chr19:16635980-16636825	#N/A	#N/A				up	10523
8231	CHMP4B	0.109304	0.50689	6.41359	8.16685e-09	1.15205e-05	8.82398	0.456141	0.565446	0.109304	20	32421988	R	II	CHMP4B	Body	opensea	Body-opensea		#N/A	#N/A			rs7262719	up	128866
8270	CHRD	0.11274	0.481956	5.75183	1.41999e-07	3.59095e-05	6.00899	0.429612	0.542352	0.11274	3	184096413	F	II	CHRD	TSS1500	shelf	TSS1500-shelf	chr3:184099095-184099582	#N/A	TRUE				up	8646
8420	CIAPIN1	0.101458	0.533002	4.74339	8.60129e-06	0.000321741	1.99575	0.485897	0.587355	0.101458	16	57477978	F	II	CIAPIN1	5'UTR	shelf	5'UTR-shelf	chr16:57480995-57481666	#N/A	#N/A				up	57019
8547	CLDN12	0.122013	0.472744	5.96843	5.64239e-08	2.38951e-05	6.91717	0.416095	0.538108	0.122013	7	90042240	R	II	CLDN12	Body	opensea	Body-opensea		#N/A	#N/A				up	9069
8549	CLDN14	0.101494	0.32658	4.8835	4.97104e-06	0.000230322	2.52901	0.279458	0.380952	0.101494	21	37853516	R	II	CLDN14	5'UTR	opensea	5'UTR-opensea		#N/A	#N/A				up	23562
8569	CLDN15	0.107313	0.325856	4.70749	9.88589e-06	0.000350804	1.86055	0.276032	0.383345	0.107313	7	100881986	F	II	CLDN15	TSS1500	opensea	TSS1500-opensea		#N/A	TRUE				up	24146
8575	CLDN18	0.119294	0.575252	5.33863	7.95616e-07	8.26785e-05	4.31814	0.519866	0.639159	0.119294	3	137728831	F	II	CLDN18	TSS200	shore	TSS200-shore	chr3:137728994-137729206	#N/A	#N/A		rs17282579		up	51208
8706	CLIP1	0.100566	0.708495	6.04004	4.14756e-08	2.14654e-05	7.22039	0.661804	0.762369	0.100566	12	122868973	F	II	CLIP1	5'UTR	opensea	5'UTR-opensea		#N/A	#N/A				up	6249
8755	CLN8	0.111681	0.538316	6.01737	4.57268e-08	2.20172e-05	7.12424	0.486464	0.598145	0.111681	8	1731574	R	II	CLN8	3'UTR	shore	3'UTR-shore	chr8:1733267-1733929	#N/A	#N/A				up	2055
8780	CLPTM1L	0.143484	0.622783	4.55988	1.74232e-05	0.000503297	1.31091	0.556165	0.699649	0.143484	5	1339114	F	II	CLPTM1L	Body	shore	Body-shore	chr5:1339662-1340082	#N/A	#N/A				up	81037
8865	CMBL	0.10468	0.453672	5.94374	6.27223e-08	2.48546e-05	6.81295	0.40507	0.50975	0.10468	5	10306031	R	II	CMBL	5'UTR	shore	5'UTR-shore	chr5:10307520-10307913	#N/A	#N/A				up	134147
8917	CMTM6	0.112779	0.696413	4.989	3.27284e-06	0.000180322	2.93623	0.644051	0.75683	0.112779	3	32541698	R	II	CMTM6	Body	shelf	Body-shelf	chr3:32544018-32544325	#N/A	#N/A				up	54918
8929	CMTM8	0.103561	0.631341	4.43714	2.77089e-05	0.000682759	0.861949	0.583259	0.68682	0.103561	3	32344486	R	II	CMTM8	Body	opensea	Body-opensea		#N/A	TRUE				up	152189
8934	CMYA5	0.101144	0.466922	4.72119	9.37501e-06	0.000339522	1.91208	0.419962	0.521106	0.101144	5	78986160	R	II	CMYA5	Body	opensea	Body-opensea		#N/A	TRUE				up	202333
9025	CNOT4	0.129267	0.549038	6.4389	7.30742e-09	1.12244e-05	8.93385	0.489021	0.618288	0.129267	7	135183939	F	II	CNOT4	5'UTR	opensea	5'UTR-opensea		#N/A	TRUE				up	4850
9065	CNTFR	0.101606	0.418097	5.15242	1.69891e-06	0.000124796	3.57616	0.370923	0.472529	0.101606	9	34555042	R	I	CNTFR	Body	opensea	Body-opensea		TRUE	#N/A				up	1271
9365	COL27A1	0.110872	0.46786	5.3439	7.7858e-07	8.16966e-05	4.33933	0.416384	0.527256	0.110872	9	117068532	F	II	COL27A1	Body	opensea	Body-opensea		#N/A	TRUE		rs5900081	rs5900080	up	85301
9455	COL8A1	0.117271	0.575012	5.28649	9.85088e-07	9.27207e-05	4.10905	0.520565	0.637836	0.117271	3	99507048	F	II	COL8A1	5'UTR	opensea	5'UTR-opensea		#N/A	TRUE				up	1295
9521	COMTD1	0.117631	0.670447	6.02968	4.3367e-08	2.17881e-05	7.17645	0.615832	0.733463	0.117631	10	76996533	R	II	COMTD1	TSS1500	shore	TSS1500-shore	chr10:76993892-76995953	#N/A	#N/A				up	118881
9567	CORO2A	0.129879	0.38226	6.33365	1.15929e-08	1.35848e-05	8.47794	0.321959	0.451839	0.129879	9	100952835	R	II	CORO2A	5'UTR	shore	5'UTR-shore	chr9:100954286-100954593	#N/A	#N/A				up	7464
9641	CPEB2	0.101993	0.610062	6.33872	1.13386e-08	1.35376e-05	8.49984	0.562708	0.664701	0.101993	4	15033042	F	II	CPEB2	Body	opensea	Body-opensea		#N/A	TRUE				up	132864
9691	CPN2	0.104189	0.478911	5.84047	9.74825e-08	3.02999e-05	6.37893	0.430537	0.534726	0.104189	3	194072416	F	II	CPN2	TSS1500	opensea	TSS1500-opensea		#N/A	#N/A				up	1370
9825	CREB5	0.11147	0.581648	4.53851	1.88978e-05	0.000530769	1.23222	0.529895	0.641365	0.11147	7	28452093	R	II	CREB5	5'UTR	shelf	5'UTR-shelf	chr7:28448716-28450028	#N/A	#N/A				up	9586
9862	CREBBP	0.108107	0.49726	6.58484	3.83942e-09	9.74916e-06	9.57015	0.447067	0.555174	0.108107	16	3824553	F	II	CREBBP	Body	opensea	Body-opensea		#N/A	TRUE				up	1387
9906	CRKL	0.108573	0.558745	4.24589	5.63162e-05	0.0011196	0.17761	0.508336	0.616909	0.108573	22	21307595	F	II	CRKL	3'UTR	shelf	3'UTR-shelf	chr22:21311336-21312201	#N/A	#N/A		rs15127	rs11913346	up	1399
10154	CTBP1	0.101181	0.460375	5.05424	2.52208e-06	0.000154854	3.19039	0.413398	0.514579	0.101181	4	1235416	F	I	CTBP1	Body	shore	Body-shore	chr4:1233872-1234420	#N/A	#N/A				up	1487
10309	CTSZ	0.100795	0.623719	4.43844	2.75748e-05	0.000680715	0.866638	0.576921	0.677717	0.100795	20	57570685	F	II	CTSZ	3'UTR	opensea	3'UTR-opensea		#N/A	#N/A				up	1522
10383	CUX1	0.107378	0.538604	3.95225	0.000161642	0.00237841	-0.834643	0.48875	0.596128	0.107378	7	101558400	R	II	CUX1	Body	shore	Body-shore	chr7:101559402-101559625	#N/A	#N/A				up	1523
10618	CYP1A1	0.10358	0.317286	6.0548	3.89201e-08	2.08529e-05	7.28307	0.269195	0.372775	0.10358	15	75019283	R	II	CYP1A1	TSS1500	island	TSS1500-island	chr15:75018186-75019336	#N/A	#N/A				up	1543
10633	CYP1A2	0.126819	0.548772	4.82418	6.27578e-06	0.000264834	2.3022	0.489892	0.616711	0.126819	15	75041386	F	II	CYP1A2	5'UTR	opensea	5'UTR-opensea		#N/A	#N/A		rs35198905		up	1544
10635	CYP1B1	0.105969	0.473711	4.8446	5.79285e-06	0.000252176	2.3801	0.424511	0.53048	0.105969	2	38300586	R	II	CYP1B1	Body	shore	Body-shore	chr2:38301276-38304518	#N/A	#N/A				up	1545
10697	CYP2C19	0.148508	0.664468	4.76051	8.0473e-06	0.00030872	2.06045	0.595518	0.744026	0.148508	10	96521086	F	II	CYP2C19	TSS1500	opensea	TSS1500-opensea		#N/A	#N/A				up	1557
10700	CYP2C8	0.102092	0.53518	5.14082	1.78043e-06	0.000127687	3.53037	0.487781	0.589872	0.102092	10	96830102	F	II	CYP2C8	TSS1500	opensea	TSS1500-opensea		#N/A	#N/A		rs7475244		up	1558
10708	CYP2D6	0.114595	0.607943	5.43967	5.2457e-07	6.68443e-05	4.72619	0.554738	0.669333	0.114595	22	42528123	R	II	CYP2D6	TSS1500	shelf	TSS1500-shelf	chr22:42524731-42525908	#N/A	#N/A				up	1565
10709	CYP2E1	0.110407	0.303867	3.80863	0.000266381	0.00343302	-1.31171	0.252607	0.363014	0.110407	10	135343193	R	II	CYP2E1	Body	shore	Body-shore	chr10:135341255-135342561	#N/A	#N/A				up	1571
10837	DAAM2	0.101496	0.34717	4.51206	2.0892e-05	0.00056699	1.1351	0.300047	0.401543	0.101496	6	39869840	R	II	DAAM2	3'UTR	shore	3'UTR-shore	chr6:39869579-39869800	#N/A	#N/A				up	23500
10865	DAB1	0.117067	0.721696	4.67161	1.13556e-05	0.000382457	1.726	0.667344	0.784411	0.117067	1	57735838	F	II	DAB1	Body	opensea	Body-opensea		#N/A	TRUE				up	1600
10894	DAB2IP	0.105634	0.576364	4.85182	5.63106e-06	0.000248086	2.40766	0.52732	0.632954	0.105634	9	124535348	F	II	DAB2IP	Body	island	Body-island	chr9:124534979-124535612	#N/A	#N/A				up	153090
10987	DAZAP1	0.108935	0.69037	6.17189	2.34555e-08	1.72152e-05	7.78238	0.639793	0.748728	0.108935	19	1424814	R	II	DAZAP1	Body	island	Body-island	chr19:1424612-1424974	#N/A	#N/A				up	26528
11112	DCPS	0.146894	0.560287	5.86127	8.92162e-08	2.9015e-05	6.46611	0.492087	0.63898	0.146894	11	126203133	R	II	DCPS	Body	opensea	Body-opensea		#N/A	#N/A				up	28960
11129	DCTN1	0.152263	0.507777	6.89181	9.7937e-10	6.4322e-06	10.9227	0.437083	0.589346	0.152263	2	74592036	F	II	DCTN1	Body	opensea	Body-opensea		#N/A	#N/A				up	1639
11147	DCUN1D4	0.122265	0.497885	5.80645	1.12649e-07	3.26706e-05	6.23668	0.441119	0.563384	0.122265	4	52718946	R	II	DCUN1D4	Body	opensea	Body-opensea		#N/A	TRUE				up	23142
11158	DDAH1	0.121133	0.610329	5.6471	2.20844e-07	4.41912e-05	5.57502	0.554089	0.675222	0.121133	1	85864304	R	II	DDAH1	Body	opensea	Body-opensea		#N/A	TRUE				up	23576
11251	DDX46	0.102035	0.381319	6.9717	6.84628e-10	5.7938e-06	11.2775	0.333945	0.43598	0.102035	5	134120499	R	II	DDX46	Body	opensea	Body-opensea		#N/A	TRUE				up	9879
11268	DEAF1	0.103556	0.49723	5.76358	1.35111e-07	3.5095e-05	6.05787	0.449151	0.552706	0.103556	11	679709	F	I	DEAF1	Body	opensea	Body-opensea		#N/A	#N/A				up	10522
11440	DGKD	0.101239	0.602267	5.19284	1.44244e-06	0.000114243	3.73609	0.555263	0.656502	0.101239	2	234370070	R	II	DGKD	Body	island	Body-island	chr2:234369786-234370099	#N/A	#N/A				up	8527
11547	DHTKD1	0.16022	0.59244	5.30914	8.97889e-07	8.84196e-05	4.19976	0.518052	0.678272	0.16022	10	12113873	F	II	DHTKD1	Body	shelf	Body-shelf	chr10:12110700-12111303	#N/A	#N/A				up	55526
11602	DIO1	0.100807	0.643956	5.50521	3.99675e-07	5.83542e-05	4.99281	0.597153	0.69796	0.100807	1	54359132	R	II	DIO1	TSS1500	shelf	TSS1500-shelf	chr1:54355354-54355656	#N/A	#N/A				up	1733
11620	DIP2A	0.100075	0.313632	5.07265	2.34261e-06	0.000148521	3.26243	0.267169	0.367244	0.100075	21	47882121	R	II	DIP2A	Body	shelf	Body-shelf	chr21:47878070-47879576	#N/A	#N/A				up	23181
11681	DIP2C	0.103435	0.516418	3.43932	0.000913472	0.00865805	-2.47999	0.468395	0.57183	0.103435	10	384652	F	I	DIP2C	Body	shelf	Body-shelf	chr10:387294-387544	TRUE	#N/A				up	22982
11763	DIXDC1	0.101993	0.492783	5.38718	6.51578e-07	7.45461e-05	4.51374	0.445429	0.547422	0.101993	11	111810533	R	II	DIXDC1	Body	shelf	Body-shelf	chr11:111807607-111808203	#N/A	#N/A				up	85458
11818	DLG1	0.132554	0.334133	4.76858	7.79846e-06	0.000302607	2.09097	0.272591	0.405144	0.132554	3	196908930	R	II	DLG1	Body	opensea	Body-opensea		#N/A	TRUE				up	1739
11829	DLG2	0.132096	0.618171	5.43388	5.37298e-07	6.76718e-05	4.70269	0.556841	0.688937	0.132096	11	83952986	F	II	DLG2	Body	opensea	Body-opensea		#N/A	TRUE				up	1740
11912	DLL1	0.104113	0.407037	4.95847	3.6952e-06	0.000193525	2.81791	0.358699	0.462812	0.104113	6	170597588	R	II	DLL1	Body	shore	Body-shore	chr6:170598214-170601222	#N/A	#N/A				up	28514
11980	DMPK	0.125124	0.517121	6.00958	4.72836e-08	2.23665e-05	7.09126	0.459027	0.584152	0.125124	19	46275613	R	II	DMPK	Body	shore	Body-shore	chr19:46270699-46275167	#N/A	#N/A				up	1760
12110	DNAJB6	0.101639	0.700097	4.43615	2.78126e-05	0.000684537	0.858338	0.652907	0.754546	0.101639	7	157185351	R	II	DNAJB6	Body	opensea	Body-opensea		#N/A	#N/A				up	10049
12422	DPP6	0.107188	0.590136	4.27258	5.10626e-05	0.00104533	0.271951	0.540371	0.647559	0.107188	7	154068736	R	I	DPP6	Body	opensea	Body-opensea		#N/A	TRUE				up	1804
12430	DPPA4	0.100773	0.324268	5.04177	2.65124e-06	0.00015942	3.14166	0.27748	0.378254	0.100773	3	109057564	F	II	DPPA4	TSS1500	opensea	TSS1500-opensea		#N/A	#N/A				up	55211
12635	DUSP10	0.102713	0.639846	5.92473	6.80403e-08	2.56773e-05	6.73282	0.592158	0.69487	0.102713	1	221911278	F	II	DUSP10	TSS1500	opensea	TSS1500-opensea		#N/A	#N/A				up	11221
12645	DUSP14	0.135243	0.543844	5.60881	2.59345e-07	4.75866e-05	5.41722	0.481053	0.616296	0.135243	17	35872723	R	II	DUSP14	Body	island	Body-island	chr17:35872722-35873026	#N/A	#N/A				up	11072
12861	EBF4	0.151492	0.495563	4.80518	6.76027e-06	0.000276718	2.22987	0.425228	0.576719	0.151492	20	2730488	F	I	EBF4	Body	island	Body-island	chr20:2729997-2730797	#N/A	#N/A				up	57593
12868	EBPL	0.114813	0.351401	6.62152	3.26383e-09	9.55381e-06	9.73082	0.298095	0.412908	0.114813	13	50244794	R	II	EBPL	Body	opensea	Body-opensea		#N/A	TRUE				up	84650
12915	EDAR	0.110594	0.759001	5.60543	2.63042e-07	4.79239e-05	5.40332	0.707654	0.818248	0.110594	2	109561317	R	II	EDAR	5'UTR	shelf	5'UTR-shelf	chr2:109558965-109559186	#N/A	#N/A				up	10913
13008	EFEMP1	0.119841	0.393904	3.8175	0.00025837	0.0033556	-1.2826	0.338264	0.458105	0.119841	2	56149464	R	II	EFEMP1	Body	shore	Body-shore	chr2:56150340-56151180	#N/A	#N/A				up	2202
13023	EFHD1	0.141289	0.747702	4.32036	4.28137e-05	0.000924164	0.441813	0.682104	0.823393	0.141289	2	233495279	R	II	EFHD1	Body	shelf	Body-shelf	chr2:233497826-233499727	#N/A	#N/A				up	80303
13026	EFHD2	0.126123	0.703778	5.15956	1.65056e-06	0.000122704	3.60437	0.645221	0.771343	0.126123	1	15756557	R	II	EFHD2	3'UTR	opensea	3'UTR-opensea		TRUE	#N/A				up	79180
13053	EFNB2	0.107764	0.645822	4.23882	5.77937e-05	0.00113996	0.152672	0.595789	0.703553	0.107764	13	107183092	R	II	EFNB2	Body	shelf	Body-shelf	chr13:107186468-107189024	#N/A	#N/A				up	1948
13090	EGFR	0.106868	0.558969	5.20192	1.39024e-06	0.000112304	3.77212	0.509352	0.61622	0.106868	7	55090516	F	II	EGFR	Body	shelf	Body-shelf	chr7:55086141-55088105	#N/A	#N/A				up	1956
13255	EIF4EBP1	0.101702	0.594175	4.52934	1.95671e-05	0.000543836	1.19852	0.546956	0.648658	0.101702	8	37889752	R	II	EIF4EBP1	Body	shore	Body-shore	chr8:37887692-37888830	#N/A	#N/A				up	1978
13275	EIF5	0.121277	0.587041	5.47751	4.4843e-07	6.16563e-05	4.87993	0.530734	0.65201	0.121277	14	103799021	F	II	EIF5	TSS1500	shore	TSS1500-shore	chr14:103799809-103801661	#N/A	#N/A		rs11628472		up	1983
13362	ELK4	0.151149	0.504835	5.19313	1.44075e-06	0.000114231	3.73723	0.434659	0.585808	0.151149	1	205603068	R	II	ELK4	TSS1500	shore	TSS1500-shore	chr1:205600493-205601432	#N/A	#N/A				up	2005
13369	ELL2	0.10837	0.462081	6.31167	1.27624e-08	1.41367e-05	8.38303	0.411766	0.520136	0.10837	5	95252658	F	II	ELL2	Body	opensea	Body-opensea		#N/A	TRUE				up	22936
13520	ENPP3	0.111459	0.563942	6.03493	4.23972e-08	2.16113e-05	7.19874	0.512194	0.623652	0.111459	6	131958144	F	II	ENPP3	TSS1500	opensea	TSS1500-opensea		#N/A	#N/A				up	5169
13662	EPHA4	0.102727	0.545804	4.53464	1.91775e-05	0.000536294	1.218	0.498109	0.600836	0.102727	2	222434303	F	I	EPHA4	Body	shore	Body-shore	chr2:222436034-222438941	#N/A	#N/A				up	2043
13744	EPN1	0.130377	0.548239	5.40642	6.01867e-07	7.18298e-05	4.59149	0.487707	0.618084	0.130377	19	56189952	F	I	EPN1	Body	shelf	Body-shelf	chr19:56186108-56186884	#N/A	#N/A				up	29924
13831	ERBB4	0.146211	0.38126	4.75438	8.24161e-06	0.000313088	2.03726	0.313376	0.459588	0.146211	2	213400697	R	II	ERBB4	Body	shore	Body-shore	chr2:213402180-213403867	#N/A	#N/A				up	2066
13860	ERCC5	0.107261	0.489866	5.10637	2.04567e-06	0.000138034	3.39475	0.440067	0.547328	0.107261	13	103514821	F	II	ERCC5	Body	opensea	Body-opensea		#N/A	#N/A			rs56109743	up	2073
13927	ERRFI1	0.122906	0.691483	6.21709	1.92747e-08	1.61263e-05	7.97606	0.634419	0.757326	0.122906	1	8078652	F	II	ERRFI1	5'UTR	opensea	5'UTR-opensea		#N/A	TRUE		rs12240177		up	54206
14031	ESRRG	0.113631	0.695414	4.25128	5.52159e-05	0.00110298	0.196614	0.642657	0.756288	0.113631	1	217306763	R	II	ESRRG	5'UTR	shore	5'UTR-shore	chr1:217307744-217309179	#N/A	#N/A				up	2104
14083	ETNK2	0.107515	0.562653	5.38524	6.56796e-07	7.47973e-05	4.50592	0.512735	0.62025	0.107515	1	204121923	R	II	ETNK2	TSS1500	shore	TSS1500-shore	chr1:204120398-204121109	#N/A	#N/A				up	55224
14232	EXPH5	0.106093	0.564244	4.98258	3.35758e-06	0.000183068	2.91131	0.514987	0.621079	0.106093	11	108408962	R	II	EXPH5	Body	opensea	Body-opensea		#N/A	#N/A				up	23086
14240	EXT1	0.103259	0.527349	6.02332	4.45705e-08	2.18863e-05	7.14948	0.479408	0.582667	0.103259	8	119018141	R	II	EXT1	Body	opensea	Body-opensea		#N/A	TRUE				up	2131
14324	F13B	0.101928	0.481791	4.50998	2.10565e-05	0.000569311	1.12751	0.434468	0.536396	0.101928	1	197030122	R	II	F13B	Body	opensea	Body-opensea		#N/A	#N/A				up	2165
14477	FAM124A	0.121386	0.390308	4.51109	2.09683e-05	0.000568267	1.13157	0.33395	0.455336	0.121386	13	51797646	R	II	FAM124A	Body	shore	Body-shore	chr13:51796492-51796888	#N/A	#N/A				up	220108
14482	FAM124B	0.102304	0.352199	5.45997	4.82283e-07	6.38423e-05	4.80858	0.3047	0.407005	0.102304	2	225266304	F	II	FAM124B	1stExon	opensea	1stExon-opensea		#N/A	TRUE			rs74731790	up	79843
14620	FAM20A	0.104394	0.405372	5.99159	5.10846e-08	2.31324e-05	7.01508	0.356903	0.461297	0.104394	17	66594875	F	II	FAM20A	Body	shore	Body-shore	chr17:66596072-66597578	#N/A	#N/A		rs78685991		up	54757
14625	FAM20B	0.106928	0.561032	5.79968	1.15935e-07	3.30028e-05	6.20839	0.511387	0.618315	0.106928	1	179042747	F	II	FAM20B	3'UTR	opensea	3'UTR-opensea		#N/A	#N/A				up	9917
14642	FAM20C	0.10592	0.69341	4.43073	2.83833e-05	0.000693863	0.838705	0.644233	0.750152	0.10592	7	214779	F	II	FAM20C	Body	shelf	Body-shelf	chr7:218309-218951	TRUE	TRUE		rs28636805		up	56975
14660	FAM50B	0.116837	0.562294	5.55363	3.2666e-07	5.28278e-05	5.19072	0.508048	0.624885	0.116837	6	3848863	R	II	FAM50B	TSS1500	shore	TSS1500-shore	chr6:3849271-3851048	#N/A	#N/A				up	26240
14721	FAM83C	0.111831	0.571575	5.51869	3.77885e-07	5.65978e-05	5.0478	0.519654	0.631485	0.111831	20	33873526	F	II	FAM83C	3'UTR	shore	3'UTR-shore	chr20:33871956-33872739	#N/A	#N/A				up	128876
14781	FARP1	0.134841	0.512927	6.37466	9.68746e-09	1.27258e-05	8.65529	0.450322	0.585163	0.134841	13	98926570	R	II	FARP1	Body	opensea	Body-opensea		#N/A	TRUE				up	10160
14919	FBP1	0.115344	0.778969	5.19294	1.44184e-06	0.000114231	3.73649	0.725416	0.84076	0.115344	9	97369791	F	I	FBP1	Body	opensea	Body-opensea		#N/A	TRUE				up	2203
14970	FBXL16	0.159676	0.284937	3.86792	0.000217033	0.00294809	-1.11626	0.210802	0.370478	0.159676	16	743998	R	I	FBXL16	3'UTR	island	3'UTR-island	chr16:743924-745943	TRUE	#N/A	high-CpG:683913-684034			up	146330
15049	FBXO40	0.105605	0.340789	4.20371	6.5699e-05	0.00124524	0.0292633	0.291758	0.397363	0.105605	3	121312127	F	II	FBXO40	TSS200	opensea	TSS200-opensea		#N/A	#N/A				up	51725
15090	FCER1G	0.124036	0.584565	6.56332	4.22259e-09	9.74916e-06	9.47606	0.526977	0.651013	0.124036	1	161188921	R	II	FCER1G	3'UTR	opensea	3'UTR-opensea		#N/A	#N/A				up	2207
15119	FCHSD2	0.101985	0.494814	6.31007	1.28521e-08	1.41367e-05	8.37611	0.447464	0.549449	0.101985	11	72662461	R	II	FCHSD2	Body	opensea	Body-opensea		#N/A	TRUE				up	9873
15258	FGF12	0.103821	0.441444	4.94116	3.95787e-06	0.000201497	2.751	0.393241	0.497062	0.103821	3	191887304	F	II	FGF12	Body	opensea	Body-opensea		#N/A	TRUE				up	2257
15373	FGFR3	0.138467	0.630223	6.24513	1.70605e-08	1.5216e-05	8.09648	0.565935	0.704402	0.138467	4	1810332	F	II	FGFR3	3'UTR	shelf	3'UTR-shelf	chr4:1806488-1806696	#N/A	#N/A		rs2121456		up	2261
15425	FHAD1	0.104724	0.576166	5.3126	8.85251e-07	8.79454e-05	4.21363	0.527544	0.632268	0.104724	1	15576394	R	II	FHAD1	5'UTR	shelf	5'UTR-shelf	chr1:15573620-15573953	#N/A	#N/A				up	114827
15565	FLI1	0.106859	0.593913	5.37475	6.85789e-07	7.65337e-05	4.46361	0.5443	0.651159	0.106859	11	128654419	F	II	FLI1	Body	opensea	Body-opensea		#N/A	TRUE		rs670991		up	2313
15593	FLJ37453	0.104313	0.252016	4.68152	1.09298e-05	0.000373338	1.76309	0.203585	0.307898	0.104313	1	16164109	F	II	FLJ37453	Body	island	Body-island	chr1:16163752-16164123	#N/A	#N/A		rs77695076		up	729614
15724	FMO5	0.114772	0.66165	5.09031	2.1822e-06	0.000143069	3.33167	0.608363	0.723134	0.114772	1	146695178	F	II	FMO5	Body	opensea	Body-opensea		#N/A	#N/A		rs10900326		up	2330
15757	FNDC3A	0.103471	0.458463	5.78558	1.23081e-07	3.37781e-05	6.14958	0.410422	0.513894	0.103471	13	49683801	R	II	FNDC3A	Body	opensea	Body-opensea		#N/A	#N/A				up	22862
15781	FNDC7	0.108658	0.609303	4.07834	0.000103329	0.00172051	-0.405884	0.558855	0.667513	0.108658	1	109255376	F	II	FNDC7	TSS200	opensea	TSS200-opensea		#N/A	#N/A				up	163479
15802	FOSB	0.1205	0.236708	4.02469	0.000125125	0.00197754	-0.589439	0.180761	0.301261	0.1205	19	45976195	F	I	FOSB	Body	island	Body-island	chr19:45975848-45976262	#N/A	TRUE				up	2354
15959	FOXN3	0.10618	0.640805	5.63539	2.31985e-07	4.54366e-05	5.52669	0.591507	0.697687	0.10618	14	89875471	F	II	FOXN3	Body	opensea	Body-opensea		#N/A	TRUE				up	1112
16059	FRAT1	0.106505	0.541809	4.90282	4.60623e-06	0.000220445	2.60322	0.492361	0.598865	0.106505	10	99081496	F	II	FRAT1	1stExon	shore	1stExon-shore	chr10:99078811-99081048	#N/A	#N/A		rs3832696		up	10023
16089	FRMD4A	0.103761	0.5209	5.13792	1.80138e-06	0.000128324	3.51895	0.472726	0.576487	0.103761	10	13851615	F	I	FRMD4A	Body	opensea	Body-opensea		#N/A	TRUE		rs73579907		up	55691
16147	FSD1	0.107058	0.592825	5.88755	7.97565e-08	2.77783e-05	6.57642	0.54312	0.650178	0.107058	19	4323081	F	I	FSD1	Body	island	Body-island	chr19:4322974-4323201	#N/A	#N/A				up	79187
16154	FSHR	0.103708	0.347532	5.57738	2.9581e-07	5.05263e-05	5.28807	0.299382	0.40309	0.103708	2	49382401	R	II	FSHR	TSS1500	opensea	TSS1500-opensea		#N/A	#N/A				up	2492
16179	FTL	0.104115	0.505517	4.94494	3.89903e-06	0.000199743	2.76559	0.457177	0.561293	0.104115	19	49469965	F	II	FTL	Body	shore	Body-shore	chr19:49468372-49469376	#N/A	#N/A	low-CpG:54161763-54161857	rs1803580	rs11553242	up	2512
16291	FXYD6	0.13144	0.520105	5.02679	2.81489e-06	0.000164763	3.08323	0.459079	0.590519	0.13144	11	117748132	F	II	FXYD6	TSS1500	shore	TSS1500-shore	chr11:117747102-117747717	#N/A	#N/A		rs3842262		up	53826
16314	FYN	0.111116	0.589784	6.28135	1.45688e-08	1.43765e-05	8.25233	0.538194	0.64931	0.111116	6	111999442	R	II	FYN	Body	opensea	Body-opensea		#N/A	TRUE				up	2534
16340	FZD5	0.100471	0.482982	5.69022	1.842e-07	4.08929e-05	5.75326	0.436334	0.536806	0.100471	2	208629716	F	II	FZD5	3'UTR	shore	3'UTR-shore	chr2:208631558-208634934	#N/A	#N/A				up	7855
16383	GABBR1	0.10874	0.546808	4.9243	4.23124e-06	0.000209555	2.68593	0.496321	0.605061	0.10874	6	29588988	F	II	GABBR1	Body	opensea	Body-opensea		#N/A	#N/A				up	2550
16519	GABRB3	0.116973	0.612002	4.55864	1.75055e-05	0.000504645	1.30635	0.557693	0.674666	0.116973	15	26860777	F	I	GABRB3	Body	opensea	Body-opensea		#N/A	TRUE				up	2562
16879	GCLC	0.115104	0.630963	6.61633	3.33983e-09	9.61881e-06	9.70805	0.577522	0.692626	0.115104	6	53375279	F	II	GCLC	Body	opensea	Body-opensea		#N/A	#N/A				up	2729
16888	GCM1	0.107314	0.675707	6.59057	3.74329e-09	9.74916e-06	9.59523	0.625883	0.733197	0.107314	6	53013647	R	II	GCM1	TSS200	opensea	TSS200-opensea		#N/A	#N/A				up	8521
16923	GDF1	0.100359	0.377927	4.53406	1.92198e-05	0.000537149	1.21587	0.331332	0.431691	0.100359	19	18980744	F	II	GDF1	Body	island	Body-island	chr19:18979351-18981200	#N/A	#N/A				up	2657
16949	GDF6	0.138125	0.305504	4.91502	4.38941e-06	0.000214825	2.65018	0.241374	0.3795	0.138125	8	97162431	F	I	GDF6	Body	opensea	Body-opensea		#N/A	#N/A				up	392255
16959	GDF7	0.109421	0.185166	3.44009	0.000911201	0.00864248	-2.47765	0.134363	0.243785	0.109421	2	20865651	F	I	GDF7	TSS1500	island	TSS1500-island	chr2:20865289-20867589	#N/A	TRUE				up	151449
17037	GFRA1	0.107187	0.610712	5.61038	2.57637e-07	4.75057e-05	5.42371	0.560946	0.668134	0.107187	10	117953295	R	II	GFRA1	Body	opensea	Body-opensea		#N/A	TRUE				up	2674
17235	GLB1L	0.10907	0.362805	4.3407	3.97078e-05	0.000876054	0.514466	0.312166	0.421236	0.10907	2	220108267	R	II	GLB1L	Body	island	Body-island	chr2:220107844-220108348	#N/A	#N/A				up	79411
17282	GLIPR2	0.111166	0.677711	4.89141	4.81838e-06	0.000226369	2.55938	0.626098	0.737264	0.111166	9	36135378	F	II	GLIPR2	TSS1500	shore	TSS1500-shore	chr9:36136188-36137229	#N/A	#N/A		rs10972754		up	152007
17377	GMIP	0.115455	0.669685	4.6547	1.212e-05	0.00039857	1.66279	0.616081	0.731536	0.115455	19	19748461	R	I	GMIP	Body	island	Body-island	chr19:19748266-19749131	TRUE	#N/A				up	51291
17456	GNAT1	0.116944	0.502382	6.43357	7.48064e-09	1.12743e-05	8.9107	0.448087	0.565031	0.116944	3	50228871	R	II	GNAT1	TSS200	shore	TSS200-shore	chr3:50230430-50232344	#N/A	#N/A				up	2779
17532	GNG7	0.124705	0.384113	6.32529	1.20247e-08	1.38284e-05	8.44182	0.326214	0.450919	0.124705	19	2616921	F	II	GNG7	5'UTR	shelf	5'UTR-shelf	chr19:2613932-2614133	#N/A	#N/A		rs74862533		up	2788
17586	GNPNAT1	0.10665	0.466177	5.38706	6.51879e-07	7.45461e-05	4.51328	0.416661	0.523311	0.10665	14	53256878	R	II	GNPNAT1	5'UTR	shore	5'UTR-shore	chr14:53257664-53258400	#N/A	#N/A				up	64841
17639	GOT2	0.11677	0.587161	5.39213	6.38395e-07	7.3877e-05	4.53376	0.532946	0.649716	0.11677	16	58752165	F	II	GOT2	Body	opensea	Body-opensea		#N/A	#N/A	low-CpG:57309625-57309691	rs75953333		up	2806
17663	GPAM	0.116804	0.663419	5.4398	5.24285e-07	6.68443e-05	4.72672	0.609188	0.725993	0.116804	10	113939632	R	II	GPAM	Body	shelf	Body-shelf	chr10:113943283-113943657	#N/A	#N/A				up	57678
17768	GPR132	0.137156	0.645315	5.17212	1.56876e-06	0.000119476	3.65404	0.581636	0.718791	0.137156	14	105522902	F	I	GPR132	5'UTR	opensea	5'UTR-opensea		#N/A	TRUE		rs76533022		up	29933
17794	GPR160	0.112657	0.512308	4.68873	1.06296e-05	0.000366895	1.79012	0.460002	0.57266	0.112657	3	169758289	F	II	GPR160	5'UTR	shore	5'UTR-shore	chr3:169755594-169756847	#N/A	#N/A		rs79417262		up	26996
17817	GPR182	0.150039	0.408905	5.16452	1.61779e-06	0.000121507	3.62396	0.339244	0.489283	0.150039	12	57387318	F	II	GPR182	TSS1500	opensea	TSS1500-opensea		#N/A	#N/A				up	11318
17937	GPSM1	0.110075	0.551371	5.48228	4.3965e-07	6.09776e-05	4.89932	0.500264	0.61034	0.110075	9	139250736	R	II	GPSM1	Body	opensea	Body-opensea		#N/A	#N/A				up	26086
17987	GPT	0.130433	0.613375	5.58408	2.87629e-07	4.97556e-05	5.3156	0.552817	0.68325	0.130433	8	145730818	F	II	GPT	Body	island	Body-island	chr8:145730390-145732205	#N/A	#N/A				up	2875
18033	GRAMD1B	0.105801	0.420921	5.19879	1.40804e-06	0.000112928	3.75968	0.371799	0.4776	0.105801	11	123396370	R	II	GRAMD1B	TSS200	opensea	TSS200-opensea		#N/A	TRUE	low-CpG:122901543-122901690		rs76058480	up	57476
18056	GRB10	0.10839	0.62469	5.27534	1.03099e-06	9.47286e-05	4.06449	0.574366	0.682756	0.10839	7	50670059	R	II	GRB10	Body	opensea	Body-opensea		#N/A	TRUE				up	2887
18107	GREB1	0.101553	0.818618	3.69188	0.000396552	0.00461971	-1.69034	0.771469	0.873021	0.101553	2	11682864	F	II	GREB1	5'UTR	opensea	5'UTR-opensea		#N/A	#N/A				up	9687
18301	GRM3	0.130336	0.4639	4.01876	0.000127786	0.0020072	-0.609601	0.403386	0.533723	0.130336	7	86272023	R	II	GRM3	TSS1500	opensea	TSS1500-opensea		#N/A	#N/A			rs274618	up	2913
18367	GSDMB	0.107917	0.780416	5.71272	1.67527e-07	3.91954e-05	5.84649	0.730312	0.838228	0.107917	17	38074070	F	II	GSDMB	TSS1500	opensea	TSS1500-opensea		#N/A	#N/A				up	55876
18449	GTF2B	0.115992	0.568486	4.6785	1.10581e-05	0.000375969	1.75177	0.514632	0.630624	0.115992	1	89357988	R	II	GTF2B	TSS1500	shore	TSS1500-shore	chr1:89356963-89357391	#N/A	#N/A				up	2959
18456	GTF2F2	0.103521	0.491198	5.46073	4.80763e-07	6.37544e-05	4.81167	0.443135	0.546656	0.103521	13	45781603	F	II	GTF2F2	Body	opensea	Body-opensea		#N/A	TRUE				up	2963
18473	GTF2IRD1	0.104911	0.559401	5.00209	3.10647e-06	0.000175193	2.9871	0.510692	0.615603	0.104911	7	73897230	R	II	GTF2IRD1	5'UTR	shelf	5'UTR-shelf	chr7:73894815-73895110	TRUE	#N/A				up	9569
18508	GUCY2C	0.123222	0.602328	5.82064	1.0606e-07	3.18396e-05	6.29596	0.545118	0.66834	0.123222	12	14804010	R	II	GUCY2C	Body	opensea	Body-opensea		#N/A	TRUE				up	2984
18576	H6PD	0.108503	0.676569	5.61841	2.49111e-07	4.66426e-05	5.45675	0.626193	0.734696	0.108503	1	9324274	R	II	H6PD	Body	island	Body-island	chr1:9324202-9324439	#N/A	#N/A				up	9563
18594	HADH	0.111681	0.474008	5.33501	8.0753e-07	8.32066e-05	4.30359	0.422156	0.533838	0.111681	4	108909664	R	II	HADH	TSS1500	shore	TSS1500-shore	chr4:108910770-108911370	#N/A	#N/A				up	3033
18600	HAGH	0.116283	0.527387	4.97696	3.43348e-06	0.000185567	2.88951	0.473399	0.589682	0.116283	16	1866681	F	II	HAGH	Body	shelf	Body-shelf	chr16:1869077-1869297	#N/A	#N/A				up	3029
18626	HAO2	0.127203	0.505383	4.52944	1.95599e-05	0.000543811	1.19888	0.446324	0.573527	0.127203	1	119910670	F	I	HAO2	TSS1500	opensea	TSS1500-opensea		#N/A	#N/A				up	51179
18774	HDAC4	0.205969	0.456377	6.17957	2.26871e-08	1.72014e-05	7.81524	0.360749	0.566718	0.205969	2	240279976	F	II	HDAC4	5'UTR	opensea	5'UTR-opensea		#N/A	#N/A		rs76433937		up	9759
18867	HEBP2	0.147312	0.52391	7.20986	2.34221e-10	3.70002e-06	12.3414	0.455515	0.602827	0.147312	6	138729779	R	II	HEBP2	Body	shelf	Body-shelf	chr6:138724617-138726215	#N/A	#N/A				up	23593
18912	HELZ	0.129995	0.641082	6.87953	1.03468e-09	6.43309e-06	10.8682	0.580728	0.710723	0.129995	17	65190638	R	II	HELZ	Body	opensea	Body-opensea		#N/A	TRUE				up	9931
18995	HGFAC	0.105381	0.454038	5.49355	4.19542e-07	5.9653e-05	4.94523	0.405112	0.510492	0.105381	4	3444147	R	II	HGFAC	Body	opensea	Body-opensea		#N/A	#N/A				up	3083
19009	HHAT	0.101969	0.607407	4.97032	3.52528e-06	0.000188254	2.86379	0.560064	0.662033	0.101969	1	210534820	R	II	HHAT	Body	opensea	Body-opensea		#N/A	TRUE				up	55733
19073	HIGD1A	0.100707	0.518957	4.80982	6.63873e-06	0.00027337	2.24751	0.472201	0.572908	0.100707	3	42842344	F	II	HIGD1A	Body	shelf	Body-shelf	chr3:42845436-42846355	#N/A	#N/A				up	25994
19082	HIP1	0.111183	0.432721	5.57301	3.01257e-07	5.10109e-05	5.27017	0.3811	0.492284	0.111183	7	75279630	F	II	HIP1	Body	opensea	Body-opensea		TRUE	TRUE				up	3092
19213	HLA-DOA	0.100628	0.691157	5.51382	3.85613e-07	5.7327e-05	5.02794	0.644437	0.745065	0.100628	6	32978053	R	II	HLA-DOA	TSS1500	shelf	TSS1500-shelf	chr6:32975684-32975926	#N/A	#N/A				up	3111
19253	HLA-DPB1	0.102426	0.457157	4.70929	9.81751e-06	0.00034949	1.86729	0.409602	0.512028	0.102426	6	33047944	R	II	HLA-DPB1	Body	shore	Body-shore	chr6:33048416-33048814	#N/A	#N/A				up	3115
19304	HLA-DRB1	0.105441	0.305313	3.71773	0.000363347	0.00432999	-1.60723	0.256358	0.3618	0.105441	6	32552039	F	I	HLA-DRB1	Body	island	Body-island	chr6:32551851-32552331	#N/A	#N/A		rs17882455	rs75044270	up	3123
19351	HLF	0.103547	0.403382	5.81075	1.10609e-07	3.24496e-05	6.25465	0.355307	0.458854	0.103547	17	53345639	R	II	HLF	Body	shelf	Body-shelf	chr17:53342198-53343061	#N/A	#N/A				up	3131
19426	HMGXB4	0.105322	0.381707	5.70343	1.74224e-07	3.97931e-05	5.80797	0.332808	0.43813	0.105322	22	35656596	R	II	HMGXB4	5'UTR	shelf	5'UTR-shelf	chr22:35653361-35654028	#N/A	#N/A				up	10042
19557	HORMAD2	0.105706	0.664653	4.67364	1.12672e-05	0.000380681	1.73359	0.615575	0.721281	0.105706	22	30477270	F	II	HORMAD2	5'UTR	shore	5'UTR-shore	chr22:30476012-30476530	#N/A	#N/A				up	150280
19920	HPR	0.103952	0.460262	4.73673	8.8267e-06	0.000327313	1.97062	0.411999	0.515951	0.103952	16	72096449	F	II	HPR	TSS1500	opensea	TSS1500-opensea		#N/A	#N/A				up	3250
20054	HSD17B2	0.124892	0.581619	5.3032	9.19999e-07	8.95216e-05	4.17595	0.523634	0.648525	0.124892	16	82117013	F	II	HSD17B2	Body	opensea	Body-opensea		#N/A	TRUE				up	3294
20224	HTRA4	0.115517	0.293366	4.27359	5.08738e-05	0.0010424	0.27552	0.239733	0.35525	0.115517	8	38831598	R	I	HTRA4	TSS200	island	TSS200-island	chr8:38831592-38832353	#N/A	TRUE			rs12114397	up	203100
20448	IGF1	0.130088	0.449705	5.41561	5.79454e-07	7.0381e-05	4.62867	0.389307	0.519395	0.130088	12	102874832	F	II	IGF1	TSS1500	opensea	TSS1500-opensea		#N/A	#N/A		rs5742612		up	3479
20518	IGFALS	0.126947	0.725304	5.06014	2.46319e-06	0.00015257	3.21344	0.666365	0.793311	0.126947	16	1842505	R	I	IGFALS	Body	island	Body-island	chr16:1840623-1842688	#N/A	#N/A				up	3483
20971	INPP4B	0.100447	0.481481	3.57614	0.00058392	0.00618481	-2.05732	0.434844	0.535292	0.100447	4	143184270	F	II	INPP4B	Body	opensea	Body-opensea		#N/A	TRUE				up	8821
21167	IQCE	0.108394	0.605256	4.0628	0.000109235	0.00179048	-0.459217	0.55493	0.663324	0.108394	7	2606824	R	I	IQCE	Body	opensea	Body-opensea		#N/A	TRUE				up	23288
21287	IRS1	0.107146	0.441163	4.85653	5.52759e-06	0.000245085	2.42571	0.391417	0.498563	0.107146	2	227662704	F	II	IRS1	1stExon	island	1stExon-island	chr2:227662082-227664912	#N/A	#N/A		rs2234931		up	3667
21424	ITGA3	0.144267	0.455322	4.71288	9.68174e-06	0.000346346	1.88081	0.388341	0.532608	0.144267	17	48154061	R	II	ITGA3	Body	opensea	Body-opensea		#N/A	#N/A				up	3675
21475	ITGAM	0.101599	0.33985	4.66163	1.18009e-05	0.000391668	1.68867	0.292679	0.394278	0.101599	16	31341875	R	II	ITGAM	Body	shore	Body-shore	chr16:31342452-31343140	#N/A	TRUE				up	3684
21512	ITGB4	0.117702	0.265693	4.05571	0.000112035	0.00182442	-0.483494	0.211045	0.328748	0.117702	17	73749654	R	II	ITGB4	Body	island	Body-island	chr17:73749618-73750178	#N/A	#N/A				up	3691
21537	ITGB7	0.117188	0.572489	5.56441	3.12279e-07	5.17098e-05	5.2349	0.51808	0.635268	0.117188	12	53590448	F	I	ITGB7	Body	shore	Body-shore	chr12:53591254-53591767	#N/A	#N/A				up	3695
21606	ITPK1	0.136681	0.621005	5.00345	3.08973e-06	0.000174517	2.99237	0.557547	0.694227	0.136681	14	93406082	F	II	ITPK1	3'UTR	opensea	3'UTR-opensea		#N/A	#N/A		rs3211120		up	3705
21672	ITPR3	0.113955	0.396574	5.06549	2.41084e-06	0.000150739	3.23441	0.343666	0.457621	0.113955	6	33638922	F	I	ITPR3	Body	opensea	Body-opensea		#N/A	#N/A		rs58712718		up	3710
21805	JARID2	0.122383	0.441078	5.20005	1.40088e-06	0.000112726	3.76466	0.384257	0.50664	0.122383	6	15266782	R	II	JARID2	Body	opensea	Body-opensea		#N/A	TRUE				up	3720
21822	JDP2	0.103005	0.522008	3.41954	0.000973652	0.00908231	-2.54009	0.474184	0.577189	0.103005	14	75918155	F	II	JDP2	Body	opensea	Body-opensea		#N/A	TRUE				up	122953
21885	JTB	0.108424	0.586639	5.36447	7.1544e-07	7.84338e-05	4.42215	0.5363	0.644723	0.108424	1	153951279	R	II	JTB	TSS1500	shore	TSS1500-shore	chr1:153949712-153950525	#N/A	#N/A				up	10899
21899	KALRN	0.104913	0.829697	4.26597	5.23173e-05	0.0010631	0.248561	0.780987	0.8859	0.104913	3	124356493	F	II	KALRN	Body	opensea	Body-opensea		#N/A	TRUE			rs74453057	up	8997
21917	KANK2	0.11624	0.621153	5.25839	1.10485e-06	9.8345e-05	3.9968	0.567185	0.683425	0.11624	19	11308987	R	II	KANK2	TSS1500	shore	TSS1500-shore	chr19:11307495-11308276	#N/A	#N/A				up	25959
21928	KANK3	0.101461	0.669419	4.73505	8.8846e-06	0.000328646	1.96427	0.622312	0.723773	0.101461	19	8396681	R	II	KANK3	Body	shore	Body-shore	chr19:8397958-8400461	#N/A	#N/A				up	256949
22016	KCNAB2	0.11397	0.5274	6.46156	6.6143e-09	1.11443e-05	9.03235	0.474486	0.588456	0.11397	1	6133428	F	II	KCNAB2	Body	shore	Body-shore	chr1:6131635-6131985	#N/A	#N/A				up	8514
22048	KCNC1	0.105103	0.640521	4.70099	1.01379e-05	0.000356132	1.83611	0.591723	0.696826	0.105103	11	17803962	F	II	KCNC1	3'UTR	shelf	3'UTR-shelf	chr11:17801026-17801277	#N/A	#N/A		rs36011418		up	3746
22078	KCNE1	0.114192	0.545419	4.99492	3.19653e-06	0.000178018	2.95923	0.492402	0.606594	0.114192	21	35883588	F	II	KCNE1	1stExon	opensea	1stExon-opensea		#N/A	TRUE		rs41315349		up	3753
22162	KCNIP2	0.110139	0.268414	3.88569	0.000204029	0.00281597	-1.05726	0.217279	0.327417	0.110139	10	103603563	R	I	KCNIP2	1stExon	island	1stExon-island	chr10:103603166-103603642	#N/A	#N/A	high-CpG:103593530-103593604			up	30819
22182	KCNJ1	0.12413	0.642881	6.47206	6.31545e-09	1.09578e-05	9.07804	0.585249	0.709379	0.12413	11	128737300	R	II	KCNJ1	TSS200	opensea	TSS200-opensea		#N/A	#N/A				up	3758
22380	KCNN4	0.110791	0.579739	5.71301	1.67319e-07	3.91913e-05	5.84771	0.5283	0.639091	0.110791	19	44277951	R	II	KCNN4	Body	shore	Body-shore	chr19:44278273-44278777	#N/A	#N/A				up	3783
22404	KCNQ1	0.10119	0.692207	6.83058	1.28777e-09	7.27646e-06	10.6515	0.645226	0.746416	0.10119	11	2584446	F	II	KCNQ1	Body	opensea	Body-opensea		#N/A	#N/A				up	3784
22504	KCNS1	0.103868	0.550574	5.81103	1.10481e-07	3.24372e-05	6.25579	0.50235	0.606218	0.103868	20	43730220	R	II	KCNS1	TSS1500	shore	TSS1500-shore	chr20:43729515-43729791	#N/A	#N/A				up	3787
22524	KCNT2	0.11021	0.650326	6.11275	3.03046e-08	1.90057e-05	7.52972	0.599157	0.709367	0.11021	1	196547408	F	II	KCNT2	Body	opensea	Body-opensea		#N/A	TRUE		rs76707206		up	343450
22552	KCTD12	0.119057	0.682981	5.25497	1.12038e-06	9.90384e-05	3.98314	0.627705	0.746761	0.119057	13	77461919	F	II	KCTD12	TSS1500	shore	TSS1500-shore	chr13:77459322-77461099	#N/A	#N/A				up	115207
22571	KCTD2	0.106374	0.310022	4.26227	5.30338e-05	0.00107306	0.235456	0.260634	0.367008	0.106374	17	73056187	F	II	KCTD2	Body	opensea	Body-opensea		TRUE	TRUE				up	23510
22585	KCTD7	0.119434	0.495885	6.10531	3.12942e-08	1.94109e-05	7.49804	0.440434	0.559867	0.119434	7	66105984	R	II	KCTD7	3'UTR	opensea	3'UTR-opensea		#N/A	#N/A				up	154881
22590	KDELR2	0.137919	0.391247	5.29599	9.47551e-07	9.07183e-05	4.14707	0.327214	0.465132	0.137919	7	6520004	F	II	KDELR2	Body	shelf	Body-shelf	chr7:6523064-6523897	#N/A	#N/A			rs57537102	up	11014
22595	KDM1B	0.161375	0.337066	5.18751	1.47395e-06	0.000115563	3.71496	0.262142	0.423517	0.161375	6	18186411	F	II	KDM1B	Body	opensea	Body-opensea		#N/A	TRUE				up	221656
22988	KLF11	0.103241	0.478852	4.76948	7.77128e-06	0.000302068	2.09437	0.430918	0.534159	0.103241	2	10187086	R	II	KLF11	Body	shelf	Body-shelf	chr2:10182635-10184702	#N/A	#N/A				up	8462
23042	KLHDC10	0.116657	0.660378	5.97227	5.5503e-08	2.37505e-05	6.93338	0.606216	0.722873	0.116657	7	129713963	R	II	KLHDC10	Body	shelf	Body-shelf	chr7:129710092-129710493	#N/A	#N/A				up	23008
23166	KLHL5	0.10117	0.545489	5.78676	1.22466e-07	3.36867e-05	6.1545	0.498517	0.599687	0.10117	4	39063331	R	II	KLHL5	TSS1500	opensea	TSS1500-opensea		#N/A	TRUE				up	51088
23176	KLHL8	0.105125	0.327856	5.05362	2.52837e-06	0.000155056	3.18796	0.279048	0.384172	0.105125	4	88140261	F	II	KLHL8	5'UTR	shore	5'UTR-shore	chr4:88140842-88141945	#N/A	#N/A				up	57563
23419	KRTCAP3	0.110451	0.550375	4.15918	7.72311e-05	0.00139715	-0.126276	0.499094	0.609545	0.110451	2	27665711	R	II	KRTCAP3	Body	shore	Body-shore	chr2:27664939-27665151	TRUE	#N/A				up	200634
23445	KTN1	0.109757	0.75966	5.05217	2.54307e-06	0.000155656	3.1823	0.708701	0.818459	0.109757	14	56060624	R	II	KTN1	5'UTR	opensea	5'UTR-opensea		#N/A	TRUE				up	3895
23557	LAMP1	0.102494	0.546469	5.11739	1.95692e-06	0.000134532	3.43806	0.498882	0.601376	0.102494	13	113976694	F	I	LAMP1	Body	shore	Body-shore	chr13:113975893-113976139	#N/A	#N/A				up	3916
23595	LARP4B	0.115782	0.552393	6.26934	1.53523e-08	1.46247e-05	8.20062	0.498637	0.614419	0.115782	10	924646	R	II	LARP4B	Body	opensea	Body-opensea		#N/A	TRUE				up	23185
23746	LDHD	0.125526	0.628293	5.36692	7.0827e-07	7.80612e-05	4.43202	0.570013	0.69554	0.125526	16	75149110	F	I	LDHD	Body	shore	Body-shore	chr16:75148398-75148864	#N/A	#N/A				up	197257
23756	LDLR	0.122346	0.533112	6.41786	8.01527e-09	1.15205e-05	8.84249	0.476309	0.598654	0.122346	19	11198556	F	II	LDLR	TSS1500	shelf	TSS1500-shelf	chr19:11200919-11201686	#N/A	#N/A				up	3949
23850	LGALS12	0.100735	0.431616	6.02561	4.41337e-08	2.1862e-05	7.15918	0.384846	0.485581	0.100735	11	63272764	R	II	LGALS12	TSS1500	opensea	TSS1500-opensea		#N/A	TRUE				up	85329
23953	LHPP	0.112907	0.513859	5.58811	2.82825e-07	4.93903e-05	5.33214	0.461437	0.574345	0.112907	10	126152789	R	II	LHPP	Body	shelf	Body-shelf	chr10:126150243-126150740	#N/A	#N/A				up	64077
24313	LOC100130872	0.126929	0.526545	4.87229	5.19538e-06	0.000236258	2.48604	0.467614	0.594543	0.126929	4	1198308	F	II	LOC100130872	Body	opensea	Body-opensea		#N/A	#N/A			rs75040018	up	100130872
24352	LOC100272217	0.136059	0.641072	6.01052	4.70945e-08	2.23161e-05	7.09521	0.577901	0.713961	0.136059	9	133453231	F	II	LOC100272217	Body	shore	Body-shore	chr9:133454629-133455496	#N/A	#N/A				up	100272217
24365	LOC153684	0.121661	0.449127	4.97659	3.4385e-06	0.000185692	2.88809	0.392641	0.514302	0.121661	5	43044675	R	II	LOC153684	Body	shore	Body-shore	chr5:43042107-43043477	#N/A	#N/A				up	153684
24464	LOXL1	0.102679	0.519043	5.47017	4.6231e-07	6.27545e-05	4.85005	0.471371	0.57405	0.102679	15	74233033	R	II	LOXL1	Body	opensea	Body-opensea		#N/A	TRUE			rs57113197	up	4016
24548	LPP	0.117903	0.547735	5.98823	5.18264e-08	2.33095e-05	7.00088	0.492995	0.610897	0.117903	3	188464815	F	II	LPP	Body	opensea	Body-opensea		#N/A	TRUE				up	4026
24592	LRIG1	0.10598	0.658951	4.02233	0.000126179	0.00198855	-0.597475	0.609746	0.715726	0.10598	3	66454763	R	I	LRIG1	Body	opensea	Body-opensea		#N/A	TRUE				up	26018
24652	LRP5	0.110999	0.562171	5.25217	1.13325e-06	9.98203e-05	3.97197	0.510636	0.621635	0.110999	11	68181087	R	II	LRP5	Body	island	Body-island	chr11:68181086-68181289	TRUE	#N/A				up	4041
24805	LRRC61	0.123167	0.508689	6.09646	3.25147e-08	1.97394e-05	7.46032	0.451504	0.574671	0.123167	7	150034769	R	II	LRRC61	3'UTR	shelf	3'UTR-shelf	chr7:150037459-150039031	#N/A	#N/A				up	65999
24811	LRRC7	0.10016	0.544102	5.37845	6.75421e-07	7.59765e-05	4.47853	0.497599	0.597759	0.10016	1	70500419	R	II	LRRC7	Body	opensea	Body-opensea		#N/A	TRUE				up	57554
24859	LRRFIP2	0.132218	0.572738	5.94984	6.11058e-08	2.47249e-05	6.83866	0.511351	0.643569	0.132218	3	37179823	R	II	LRRFIP2	Body	opensea	Body-opensea		#N/A	TRUE				up	9209
24864	LRRK1	0.132126	0.445509	4.87378	5.16493e-06	0.000235329	2.49176	0.384165	0.516291	0.132126	15	101514474	R	II	LRRK1	Body	shore	Body-shore	chr15:101513245-101514323	#N/A	TRUE				up	79705
24914	LSM12	0.114957	0.510011	6.17501	2.31399e-08	1.72014e-05	7.79575	0.456638	0.571595	0.114957	17	42144929	R	II	LSM12	1stExon	shore	1stExon-shore	chr17:42143654-42144096	#N/A	#N/A				up	124801
24955	LSS	0.109471	0.57871	5.43028	5.45363e-07	6.80738e-05	4.68809	0.527884	0.637355	0.109471	21	47647568	F	II	LSS	Body	shore	Body-shore	chr21:47648191-47649622	#N/A	#N/A				up	4047
25034	LTBP4	0.135083	0.592409	4.85531	5.55436e-06	0.000245942	2.42101	0.529692	0.664775	0.135083	19	41129962	F	I	LTBP4	Body	island	Body-island	chr19:41129847-41130112	TRUE	#N/A				up	8425
25142	LYG2	0.103031	0.472003	6.21173	1.97288e-08	1.62755e-05	7.95309	0.424167	0.527198	0.103031	2	99867344	F	II	LYG2	Body	opensea	Body-opensea		#N/A	#N/A				up	254773
25163	LYNX1	0.123594	0.513634	3.83207	0.000245708	0.00323192	-1.23468	0.456251	0.579846	0.123594	8	143859734	F	II	LYNX1	TSS200	shore	TSS200-shore	chr8:143858279-143859411	#N/A	#N/A				up	66004
25200	LYPLA1	0.12249	0.579069	4.90901	4.49485e-06	0.000217789	2.62706	0.522198	0.644688	0.12249	8	55011819	F	II	LYPLA1	Body	shelf	Body-shelf	chr8:55014024-55014681	#N/A	#N/A				up	10434
25236	LZTFL1	0.129107	0.520845	5.21678	1.30884e-06	0.000108473	3.8311	0.460902	0.590009	0.129107	3	45879990	R	II	LZTFL1	Body	shelf	Body-shelf	chr3:45883221-45883860	#N/A	#N/A				up	54585
25321	MAD1L1	0.114093	0.582584	3.66609	0.000432545	0.00493163	-1.77285	0.529612	0.643705	0.114093	7	1912065	F	II	MAD1L1	Body	shore	Body-shore	chr7:1913829-1914077	#N/A	#N/A				up	8379
25588	MANBA	0.106637	0.516432	6.4718	6.3228e-09	1.09578e-05	9.07689	0.466922	0.573559	0.106637	4	103634624	R	II	MANBA	Body	opensea	Body-opensea		#N/A	TRUE				up	4126
25685	MAP3K9	0.100149	0.55478	6.09383	3.28866e-08	1.98902e-05	7.44911	0.508282	0.608431	0.100149	14	71239883	F	II	MAP3K9	Body	opensea	Body-opensea		#N/A	TRUE				up	4293
25712	MAP4K4	0.126135	0.642726	5.955	5.97677e-08	2.4506e-05	6.86047	0.584163	0.710298	0.126135	2	102510535	R	II	MAP4K4	3'UTR	opensea	3'UTR-opensea		#N/A	TRUE				up	9448
25739	MAP7D1	0.110489	0.606024	5.31227	8.86433e-07	8.79848e-05	4.21233	0.554725	0.665215	0.110489	1	36644157	R	I	MAP7D1	Body	island	Body-island	chr1:36643955-36644327	TRUE	#N/A				up	55700
26041	MCC	0.101343	0.465182	4.25118	5.5236e-05	0.00110321	0.196264	0.41813	0.519472	0.101343	5	112628419	F	II	MCC	Body	shore	Body-shore	chr5:112630219-112630624	#N/A	#N/A		rs73246677		up	4163
26065	MCCC1	0.11472	0.73574	7.03382	5.17945e-10	5.34106e-06	11.5541	0.682477	0.797197	0.11472	3	182814959	R	II	MCCC1	Body	shore	Body-shore	chr3:182816771-182817455	#N/A	#N/A			rs71629974	up	56922
26238	MED12L	0.132687	0.568609	5.20854	1.35339e-06	0.000110325	3.79838	0.507004	0.639691	0.132687	3	150874026	R	II	MED12L	Body	opensea	Body-opensea		#N/A	TRUE				up	116931
26260	MED24	0.112466	0.623079	3.44951	0.000883864	0.00845005	-2.44894	0.570863	0.683329	0.112466	17	38183730	R	I	MED24	Body	opensea	Body-opensea		#N/A	#N/A				up	9862
26427	MERTK	0.101453	0.521995	5.91446	7.10967e-08	2.62268e-05	6.68956	0.474891	0.576344	0.101453	2	112704577	R	II	MERTK	Body	opensea	Body-opensea		TRUE	TRUE				up	10461
26478	MEX3A	0.124749	0.409501	4.90568	4.55447e-06	0.000219287	2.61423	0.351582	0.476331	0.124749	1	156046546	F	I	MEX3A	Body	island	Body-island	chr1:156046343-156047384	TRUE	#N/A				up	92312
26486	MEX3B	0.108442	0.479295	5.25081	1.13953e-06	0.000100258	3.96657	0.428947	0.537389	0.108442	15	82335947	R	II	MEX3B	Body	island	Body-island	chr15:82335472-82339937	#N/A	#N/A				up	84206
26528	MFSD1	0.121991	0.566303	4.79962	6.90906e-06	0.000280395	2.2087	0.509664	0.631655	0.121991	3	158518888	F	II	MFSD1	TSS1500	shore	TSS1500-shore	chr3:158519509-158520329	#N/A	#N/A				up	64747
26552	MFSD6L	0.108512	0.573251	5.14759	1.73238e-06	0.000126071	3.5571	0.52287	0.631382	0.108512	17	8702099	R	II	MFSD6L	1stExon	shore	1stExon-shore	chr17:8702342-8702824	#N/A	TRUE				up	162387
26582	MGAT4A	0.136114	0.536064	5.54744	3.35211e-07	5.35716e-05	5.16536	0.472869	0.608983	0.136114	2	99342986	R	II	MGAT4A	5'UTR	shelf	5'UTR-shelf	chr2:99346882-99348177	#N/A	#N/A				up	11320
26632	MGMT	0.142247	0.69839	4.59128	1.54562e-05	0.000465576	1.42699	0.632346	0.774593	0.142247	10	131557157	R	II	MGMT	Body	opensea	Body-opensea		#N/A	#N/A				up	4255
26652	MGRN1	0.109652	0.640195	5.2815	1.00538e-06	9.37814e-05	4.0891	0.589285	0.698937	0.109652	16	4702769	F	II	MGRN1	Body	island	Body-island	chr16:4702628-4702851	#N/A	#N/A				up	23295
26699	MIB1	0.128971	0.589567	6.41665	8.05774e-09	1.15205e-05	8.83727	0.529687	0.658658	0.128971	18	19406021	R	II	MIB1	Body	opensea	Body-opensea		#N/A	#N/A				up	57534
26805	MIR122	0.105668	0.560122	5.53146	3.58306e-07	5.5209e-05	5.09999	0.511062	0.61673	0.105668	18	56117327	F	II	MIR122	TSS1500	opensea	TSS1500-opensea		#N/A	#N/A				up	406906
26826	MIR125A	0.115815	0.720506	5.79418	1.18671e-07	3.32767e-05	6.18546	0.666735	0.78255	0.115815	19	52196495	F	II	MIR125A	TSS200	opensea	TSS200-opensea		#N/A	#N/A		rs12975333		up	406910
26978	MIR26B	0.12715	0.47328	5.61792	2.49626e-07	4.66921e-05	5.45472	0.414245	0.541396	0.12715	2	219267443	R	II	MIR26B	Body	shore	Body-shore	chr2:219263098-219265556	#N/A	#N/A				up	407017
27001	MIR33B	0.11268	0.642442	5.8446	9.57837e-08	3.00677e-05	6.39622	0.590126	0.702806	0.11268	17	17718525	F	II	MIR33B	TSS1500	shelf	TSS1500-shelf	chr17:17715696-17716219	#N/A	#N/A				up	693120
27074	MIR589	0.103115	0.661223	3.97766	0.000147799	0.00222896	-0.748959	0.613348	0.716464	0.103115	7	5535692	F	I	MIR589	TSS200	shore	TSS200-shore	chr7:5534384-5534766	#N/A	#N/A				up	693174
27158	MKLN1	0.145587	0.642803	5.6482	2.19828e-07	4.40812e-05	5.57955	0.575209	0.720796	0.145587	7	131156554	R	II	MKLN1	Body	opensea	Body-opensea		#N/A	TRUE				up	4289
27190	MLLT10	0.102513	0.601505	5.29916	9.35328e-07	9.02717e-05	4.15978	0.553909	0.656423	0.102513	10	21958473	F	II	MLLT10	Body	opensea	Body-opensea		#N/A	TRUE				up	8028
27345	MOCOS	0.142042	0.534873	4.94913	3.83473e-06	0.000197818	2.78179	0.468925	0.610967	0.142042	18	33769346	R	II	MOCOS	Body	shore	Body-shore	chr18:33766391-33768145	#N/A	#N/A				up	55034
27390	MORC1	0.103192	0.556709	5.51157	3.89239e-07	5.75925e-05	5.01876	0.508799	0.611991	0.103192	3	108837484	F	II	MORC1	TSS1500	shore	TSS1500-shore	chr3:108836795-108837089	#N/A	#N/A				up	27136
27422	MOSPD3	0.111336	0.555992	4.64422	1.26183e-05	0.000408158	1.62369	0.5043	0.615636	0.111336	7	100208533	F	II	MOSPD3	TSS1500	shore	TSS1500-shore	chr7:100209594-100210655	#N/A	#N/A				up	64598
27705	MSRA	0.103532	0.512926	5.97143	5.57026e-08	2.37505e-05	6.92984	0.464858	0.568389	0.103532	8	9996632	F	II	MSRA	Body	opensea	Body-opensea		#N/A	TRUE				up	4482
27740	MT1G	0.101639	0.401082	4.77894	7.48987e-06	0.000294877	2.13022	0.353893	0.455531	0.101639	16	56703257	R	I	MT1G	TSS1500	shore	TSS1500-shore	chr16:56703387-56703648	#N/A	TRUE			rs12446001	up	4495
27784	MTHFD1L	0.102226	0.769299	4.3097	4.45343e-05	0.000950068	0.403813	0.721837	0.824063	0.102226	6	151346409	F	II	MTHFD1L	Body	opensea	Body-opensea		#N/A	#N/A				up	25902
27791	MTHFS	0.100457	0.559189	4.47174	2.43284e-05	0.000626552	0.987758	0.512548	0.613005	0.100457	15	80185399	F	II	MTHFS	Body	shelf	Body-shelf	chr15:80189006-80189695	#N/A	#N/A				up	10588
27834	MTOR	0.119508	0.596482	6.18003	2.2642e-08	1.72014e-05	7.8172	0.540996	0.660504	0.119508	1	11249046	R	II	MTOR	Body	opensea	Body-opensea		#N/A	#N/A				up	2475
27868	MTUS1	0.117644	0.65043	3.42282	0.000963427	0.00901062	-2.53015	0.595809	0.713453	0.117644	8	17640624	F	II	MTUS1	5'UTR	opensea	5'UTR-opensea		#N/A	TRUE				up	57509
27965	MVK	0.100429	0.550397	4.58046	1.61083e-05	0.00047822	1.38694	0.50377	0.604198	0.100429	12	110012500	R	II	MVK	5'UTR	shore	5'UTR-shore	chr12:110010994-110011599	#N/A	#N/A				up	4598
28087	MYH9	0.147796	0.493972	7.2043	2.40171e-10	3.70002e-06	12.3165	0.425352	0.573148	0.147796	22	36681341	R	I	MYH9	Body	opensea	Body-opensea		#N/A	#N/A	low-CpG:35011227-35011289			up	4627
28151	MYLK4	0.114033	0.57232	6.0987	3.22015e-08	1.97394e-05	7.46986	0.519376	0.63341	0.114033	6	2751402	R	II	MYLK4	TSS1500	opensea	TSS1500-opensea		#N/A	#N/A				up	340156
28226	MYO1C	0.156673	0.568212	5.38526	6.56739e-07	7.47973e-05	4.50601	0.495471	0.652144	0.156673	17	1372751	R	I	MYO1C	Body	shelf	Body-shelf	chr17:1375216-1375460	TRUE	#N/A		rs66694159		up	4641
28391	N4BP2L1	0.101733	0.409345	5.40666	6.01251e-07	7.17813e-05	4.59249	0.362112	0.463844	0.101733	13	32984237	F	II	N4BP2L1	Body	opensea	Body-opensea		#N/A	TRUE				up	90634
28435	NADK	0.143258	0.621967	7.11119	3.65608e-10	4.4237e-06	11.8996	0.555455	0.698713	0.143258	1	1689012	F	I	NADK	Body	shelf	Body-shelf	chr1:1691767-1692063	#N/A	#N/A				up	65220
28515	NARF	0.103021	0.517285	5.21111	1.33932e-06	0.000109602	3.80859	0.469454	0.572475	0.103021	17	80415469	F	II	NARF	TSS1500	shore	TSS1500-shore	chr17:80416004-80417259	#N/A	#N/A				up	26502
28531	NAT2	0.118822	0.528568	5.48593	4.3302e-07	6.04851e-05	4.91422	0.473401	0.592223	0.118822	8	18248649	F	II	NAT2	TSS200	shelf	TSS200-shelf	chr8:18244455-18245226	#N/A	#N/A		rs4646246	rs55927170	up	10
28638	NCBP1	0.119806	0.62113	6.02378	4.44828e-08	2.18863e-05	7.15142	0.565506	0.685312	0.119806	9	100398470	F	II	NCBP1	Body	shelf	Body-shelf	chr9:100395340-100396414	#N/A	#N/A			rs58352235	up	4686
28841	NDST1	0.102188	0.549646	5.75835	1.38137e-07	3.54707e-05	6.0361	0.502202	0.60439	0.102188	5	149903908	R	II	NDST1	Body	shelf	Body-shelf	chr5:149907465-149907687	#N/A	TRUE				up	3340
28958	NEK10	0.10134	0.600163	5.21993	1.29221e-06	0.000107635	3.84361	0.553112	0.654452	0.10134	3	27401810	F	II	NEK10	5'UTR	opensea	5'UTR-opensea		#N/A	TRUE				up	152110
29018	NEU4	0.160606	0.532887	5.46827	4.65959e-07	6.29129e-05	4.84234	0.45832	0.618926	0.160606	2	242749925	R	II	NEU4	TSS1500	opensea	TSS1500-opensea		TRUE	TRUE				up	129807
29101	NFATC1	0.134602	0.56166	3.92983	0.000174874	0.00251718	-0.909903	0.499166	0.633768	0.134602	18	77157986	R	II	NFATC1	Body	island	Body-island	chr18:77153292-77160759	#N/A	#N/A				up	4772
29181	NFIA	0.10733	0.61282	5.00822	3.03149e-06	0.00017245	3.01092	0.562988	0.670318	0.10733	1	61785870	R	II	NFIA	Body	opensea	Body-opensea		#N/A	TRUE				up	4774
29225	NFIX	0.133559	0.50392	3.41562	0.000986019	0.00916579	-2.55198	0.44191	0.57547	0.133559	19	13198960	F	I	NFIX	Body	island	Body-island	chr19:13198699-13198999	#N/A	#N/A				up	4784
29287	NFYB	0.101061	0.430396	5.37111	6.96151e-07	7.72321e-05	4.44892	0.383475	0.484536	0.101061	12	104526470	R	II	NFYB	Body	opensea	Body-opensea		#N/A	TRUE				up	4801
29483	NLK	0.14712	0.549931	6.23647	1.7716e-08	1.54493e-05	8.05928	0.481626	0.628746	0.14712	17	26517057	F	II	NLK	Body	opensea	Body-opensea		#N/A	TRUE				up	51701
29536	NLRP6	0.112241	0.518556	4.56003	1.74128e-05	0.000503185	1.31149	0.466444	0.578685	0.112241	11	278462	F	II	NLRP6	TSS200	shore	TSS200-shore	chr11:279072-281700	#N/A	#N/A		rs79393769		up	171389
29617	NOL12	0.10054	0.565546	6.13962	2.69777e-08	1.81075e-05	7.64439	0.518866	0.619406	0.10054	22	38081176	F	II	NOL12	TSS1500	shore	TSS1500-shore	chr22:38082302-38082796	#N/A	#N/A				up	79159
29760	NPC1L1	0.103163	0.677947	3.94769	0.000164253	0.00240525	-0.849974	0.63005	0.733213	0.103163	7	44578565	R	II	NPC1L1	Body	opensea	Body-opensea		#N/A	#N/A				up	29881
29793	NPHP4	0.107226	0.494904	5.0447	2.62025e-06	0.000158338	3.15313	0.445121	0.552347	0.107226	1	5956985	F	II	NPHP4	Body	opensea	Body-opensea		#N/A	#N/A		rs77789908		up	261734
29835	NPR2	0.112473	0.240991	4.73519	8.87965e-06	0.000328548	1.96481	0.188771	0.301245	0.112473	9	35791475	R	II	NPR2	TSS1500	shore	TSS1500-shore	chr9:35791584-35791924	#N/A	#N/A				up	4882
29899	NR1H3	0.129455	0.403078	5.97105	5.57946e-08	2.37505e-05	6.92821	0.342974	0.472429	0.129455	11	47280305	F	II	NR1H3	5'UTR	opensea	5'UTR-opensea		#N/A	TRUE				up	10062
29932	NR2E3	0.111818	0.694079	6.09961	3.20749e-08	1.97394e-05	7.47374	0.642163	0.753981	0.111818	15	72101891	R	I	NR2E3	TSS1500	shelf	TSS1500-shelf	chr15:72104191-72104418	#N/A	TRUE			rs900544	up	10002
29968	NR2F6	0.10285	0.471115	5.7621	1.35957e-07	3.5226e-05	6.05174	0.423363	0.526213	0.10285	19	17350726	F	II	NR2F6	Body	shelf	Body-shelf	chr19:17346165-17346886	#N/A	#N/A				up	2063
30072	NRGN	0.100607	0.583103	4.44729	2.66732e-05	0.000665262	0.898776	0.536393	0.637	0.100607	11	124615143	R	II	NRGN	Body	shore	Body-shore	chr11:124615389-124617006	#N/A	TRUE				up	4900
30194	NT5DC3	0.118438	0.508968	5.04371	2.63067e-06	0.00015864	3.14926	0.453979	0.572417	0.118438	12	104233595	R	II	NT5DC3	Body	shore	Body-shore	chr12:104234273-104235327	#N/A	#N/A				up	51559
30323	NUBP2	0.10558	0.453599	5.32494	8.41568e-07	8.53111e-05	4.26317	0.40458	0.51016	0.10558	16	1836234	F	II	NUBP2	Body	shore	Body-shore	chr16:1836680-1837012	#N/A	#N/A		rs344357		up	10101
30345	NUDT6	0.100082	0.770564	4.25405	5.46567e-05	0.00109508	0.20642	0.724097	0.824179	0.100082	4	123841683	R	II	NUDT6	5'UTR	shore	5'UTR-shore	chr4:123843362-123843795	#N/A	#N/A				up	11162
30465	OAT	0.122107	0.757361	5.95692	5.92791e-08	2.44027e-05	6.86855	0.700668	0.822776	0.122107	10	126106425	R	II	OAT	5'UTR	shore	5'UTR-shore	chr10:126106818-126107862	#N/A	#N/A				up	4942
30524	ODF2	0.102306	0.514236	6.2911	1.39617e-08	1.42548e-05	8.29435	0.466737	0.569043	0.102306	9	131258276	F	II	ODF2	Body	opensea	Body-opensea		#N/A	#N/A				up	4957
30569	OLFM1	0.104241	0.35975	4.12164	8.84463e-05	0.0015384	-0.256572	0.311352	0.415593	0.104241	9	137999757	F	II	OLFM1	Body	shelf	Body-shelf	chr9:137997370-137997588	#N/A	#N/A				up	10439
31177	PACS2	0.101367	0.60973	3.70114	0.000384337	0.00451342	-1.66061	0.562666	0.664033	0.101367	14	105802735	F	II	PACS2	Body	opensea	Body-opensea		#N/A	#N/A				up	23241
31325	PAPLN	0.124948	0.231841	3.79503	0.000279124	0.003558	-1.35624	0.17383	0.298778	0.124948	14	73736972	F	I	PAPLN	Body	opensea	Body-opensea		TRUE	TRUE			rs60449567	up	89932
31326	PAPOLA	0.110397	0.575063	5.57333	3.00857e-07	5.1006e-05	5.27147	0.523807	0.634204	0.110397	14	96978537	F	II	PAPOLA	Body	opensea	Body-opensea		#N/A	TRUE				up	10914
31361	PAQR8	0.129695	0.555327	7.45309	7.77546e-11	2.74704e-06	13.4363	0.495111	0.624806	0.129695	6	52268609	R	II	PAQR8	Body	shore	Body-shore	chr6:52267981-52268199	#N/A	#N/A			rs17852802	up	85315
31437	PARP10	0.109833	0.648178	5.71994	1.62492e-07	3.84979e-05	5.87648	0.597184	0.707017	0.109833	8	145057141	F	II	PARP10	Body	opensea	Body-opensea		TRUE	#N/A				up	84875
31489	PASK	0.110705	0.584774	4.91034	4.47134e-06	0.000217134	2.63217	0.533375	0.64408	0.110705	2	242065812	R	II	PASK	Body	opensea	Body-opensea		#N/A	#N/A				up	23178
31647	PCCA	0.129488	0.492153	5.75579	1.39638e-07	3.56204e-05	6.02547	0.432033	0.561522	0.129488	13	101175894	R	II	PCCA	Body	opensea	Body-opensea		#N/A	#N/A				up	5095
31761	PCGF3	0.102047	0.418634	6.67238	2.60486e-09	8.78124e-06	9.95398	0.371254	0.473302	0.102047	4	736398	R	II	PCGF3	Body	shelf	Body-shelf	chr4:738424-741517	#N/A	#N/A				up	10336
31802	PCOLCE	0.125774	0.465105	5.81101	1.10488e-07	3.24372e-05	6.25573	0.40671	0.532484	0.125774	7	100200003	F	II	PCOLCE	1stExon	shore	1stExon-shore	chr7:100201614-100203652	#N/A	#N/A	low-CpG:100037899-100037957			up	5118
31813	PCP4	0.100969	0.204312	4.10727	9.31425e-05	0.00159769	-0.306257	0.157434	0.258403	0.100969	21	41239042	F	II	PCP4	TSS1500	opensea	TSS1500-opensea		#N/A	TRUE				up	5121
32116	PDK4	0.190275	0.568759	6.16014	2.46824e-08	1.75346e-05	7.73209	0.480417	0.670692	0.190275	7	95222104	F	II	PDK4	Body	shelf	Body-shelf	chr7:95225503-95226194	#N/A	#N/A				up	5166
32243	PEMT	0.126111	0.65857	5.07463	2.32407e-06	0.00014785	3.27018	0.600019	0.726129	0.126111	17	17463324	F	II	PEMT	Body	shore	Body-shore	chr17:17465135-17465397	#N/A	#N/A		rs4646369		up	10400
32285	PER3	0.118958	0.611668	5.15576	1.67617e-06	0.000123855	3.58933	0.556438	0.675396	0.118958	1	7845070	R	II	PER3	Body	island	Body-island	chr1:7843915-7845104	#N/A	#N/A				up	8863
32306	PEX10	0.107256	0.511646	4.18683	6.98609e-05	0.00130131	-0.0298294	0.461849	0.569105	0.107256	1	2338738	F	II	PEX10	Body	shore	Body-shore	chr1:2339876-2340246	#N/A	#N/A		rs78922288		up	5192
32320	PEX14	0.10641	0.604532	5.893	7.79234e-08	2.74952e-05	6.59931	0.555128	0.661537	0.10641	1	10568783	R	II	PEX14	Body	opensea	Body-opensea		#N/A	TRUE				up	5195
32384	PFKP	0.155247	0.685444	6.34074	1.12389e-08	1.35376e-05	8.50857	0.613365	0.768612	0.155247	10	3147056	R	II	PFKP	Body	shore	Body-shore	chr10:3148406-3148625	#N/A	#N/A				up	5214
32548	PHF13	0.139776	0.475535	5.10849	2.02829e-06	0.000137349	3.40308	0.410639	0.550415	0.139776	1	6681584	R	II	PHF13	Body	shelf	Body-shelf	chr1:6685071-6685691	#N/A	#N/A				up	148479
32593	PHLDB1	0.102935	0.168694	3.7039	0.000380775	0.00448263	-1.65176	0.120902	0.223838	0.102935	11	118481025	R	II	PHLDB1	5'UTR	island	5'UTR-island	chr11:118478235-118481896	#N/A	#N/A				up	23187
32681	PI4KA	0.137883	0.390626	4.48984	2.2723e-05	0.000599936	1.0538	0.326609	0.464492	0.137883	22	21133973	R	II	PI4KA	Body	opensea	Body-opensea		#N/A	#N/A				up	5297
32707	PIGQ	0.104089	0.172629	3.54065	0.000656466	0.00675261	-2.16812	0.124302	0.228391	0.104089	16	629015	R	I	PIGQ	Body	shore	Body-shore	chr16:629463-629903	TRUE	#N/A			rs59476302	up	9091
32896	PITPNM3	0.107368	0.616127	5.12653	1.8861e-06	0.000131883	3.47406	0.566278	0.673646	0.107368	17	6358415	R	II	PITPNM3	3'UTR	island	3'UTR-island	chr17:6358414-6358955	#N/A	#N/A				up	83394
32951	PKDREJ	0.106942	0.551469	6.47146	6.33224e-09	1.09578e-05	9.07542	0.501817	0.608759	0.106942	22	46660593	F	II	PKDREJ	TSS1500	shore	TSS1500-shore	chr22:46658397-46659332	#N/A	#N/A				up	10343
33137	PLCE1	0.102614	0.496284	6.08082	3.47872e-08	1.99884e-05	7.39372	0.448642	0.551256	0.102614	10	95835936	F	II	PLCE1	Body	opensea	Body-opensea		#N/A	TRUE		rs927720		up	51196
33195	PLD5	0.13809	0.643489	4.86302	5.3885e-06	0.000241304	2.45051	0.579376	0.717466	0.13809	1	242407965	F	II	PLD5	Body	opensea	Body-opensea		#N/A	TRUE				up	200150
33267	PLEKHB1	0.108292	0.529329	4.44508	2.68954e-05	0.000668869	0.890753	0.47905	0.587342	0.108292	11	73357164	R	II	PLEKHB1	TSS200	opensea	TSS200-opensea		#N/A	#N/A				up	58473
33385	PLIN4	0.107192	0.50976	6.3159	1.25285e-08	1.41196e-05	8.40129	0.459992	0.567184	0.107192	19	4518890	F	I	PLIN4	TSS1500	opensea	TSS1500-opensea		TRUE	TRUE				up	729359
33549	PMEPA1	0.127293	0.570603	4.55641	1.76548e-05	0.000507689	1.29812	0.511503	0.638795	0.127293	20	56225978	F	II	PMEPA1	3'UTR	shore	3'UTR-shore	chr20:56227252-56227687	#N/A	#N/A		rs78651555		up	56937
33583	PNKD	0.115197	0.246348	5.97568	5.46969e-08	2.36741e-05	6.94779	0.192864	0.308061	0.115197	2	219187374	F	I	PNKD	TSS1500	shore	TSS1500-shore	chr2:219187653-219188251	#N/A	#N/A				up	25953
33896	PPFIBP2	0.100148	0.428938	6.13501	2.7521e-08	1.81795e-05	7.62473	0.382441	0.482588	0.100148	11	7621556	R	II	PPFIBP2	Body	opensea	Body-opensea		#N/A	TRUE				up	8495
33907	PPIH	0.101071	0.424813	6.51758	5.16756e-09	1.03472e-05	9.27635	0.377887	0.478958	0.101071	1	43123399	F	II	PPIH	TSS1500	shore	TSS1500-shore	chr1:43123977-43124422	#N/A	#N/A				up	10465
33979	PPP1R10	0.112452	0.45768	5.31556	8.7458e-07	8.73058e-05	4.2255	0.40547	0.517922	0.112452	6	30579560	F	II	PPP1R10	5'UTR	opensea	5'UTR-opensea		#N/A	TRUE				up	5514
34003	PPP1R16A	0.132949	0.510973	5.7921	1.19727e-07	3.33528e-05	6.17674	0.449247	0.582196	0.132949	8	145725402	R	II	PPP1R16A	Body	shore	Body-shore	chr8:145725460-145726707	#N/A	#N/A				up	84988
34042	PPP1R3C	0.107205	0.391896	5.48801	4.29309e-07	6.02057e-05	4.92266	0.342122	0.449327	0.107205	10	93389086	R	II	PPP1R3C	3'UTR	shelf	3'UTR-shelf	chr10:93392667-93393147	#N/A	#N/A				up	5507
34112	PPP4R2	0.122716	0.411986	4.91473	4.39442e-06	0.000214943	2.64907	0.355011	0.477727	0.122716	3	73105046	F	II	PPP4R2	Body	opensea	Body-opensea		#N/A	TRUE		rs74747870		up	151987
34172	PRDM10	0.124592	0.611755	6.47017	6.36819e-09	1.09578e-05	9.06982	0.553909	0.678501	0.124592	11	129869654	R	II	PRDM10	5'UTR	shelf	5'UTR-shelf	chr11:129871690-129873423	#N/A	#N/A				up	56980
34229	PRDM16	0.120945	0.567678	4.7047	9.99325e-06	0.000353004	1.85006	0.511525	0.63247	0.120945	1	3154700	F	II	PRDM16	Body	shore	Body-shore	chr1:3155160-3155361	#N/A	#N/A				up	63976
34410	PRDX1	0.118133	0.580795	4.62204	1.374e-05	0.000432237	1.5411	0.525947	0.64408	0.118133	1	45986120	R	II	PRDX1	5'UTR	shore	5'UTR-shore	chr1:45987163-45987803	#N/A	#N/A				up	5052
34467	PRKAB1	0.129628	0.522425	5.51275	3.87345e-07	5.74102e-05	5.02354	0.46224	0.591868	0.129628	12	120118807	R	II	PRKAB1	3'UTR	opensea	3'UTR-opensea		#N/A	#N/A				up	5564
34468	PRKAB2	0.103179	0.525004	5.15277	1.69649e-06	0.000124736	3.57755	0.477099	0.580279	0.103179	1	146642035	F	II	PRKAB2	Body	shore	Body-shore	chr1:146643470-146644501	#N/A	#N/A		rs57570045		up	5565
34552	PRKCA	0.116937	0.612432	6.20609	2.02183e-08	1.6477e-05	7.9289	0.55814	0.675077	0.116937	17	64351144	F	II	PRKCA	Body	opensea	Body-opensea		#N/A	TRUE				up	5578
34700	PRMT3	0.143507	0.508071	6.49968	5.59211e-09	1.05809e-05	9.19829	0.441443	0.58495	0.143507	11	20465288	F	II	PRMT3	Body	opensea	Body-opensea		#N/A	TRUE				up	10196
34730	PROCR	0.129138	0.708022	5.56587	3.10382e-07	5.16737e-05	5.24088	0.648065	0.777203	0.129138	20	33762943	F	I	PROCR	Body	shore	Body-shore	chr20:33762403-33762774	TRUE	#N/A				up	10544
34765	PROZ	0.107964	0.516912	5.43297	5.39312e-07	6.77476e-05	4.69903	0.466786	0.57475	0.107964	13	113813693	F	II	PROZ	Body	opensea	Body-opensea		#N/A	TRUE		rs3024716		up	8858
34783	PRPF8	0.101433	0.417721	6.85073	1.17689e-09	6.83723e-06	10.7407	0.370626	0.47206	0.101433	17	1554059	R	I	PRPF8	3'UTR	shore	3'UTR-shore	chr17:1551730-1553249	#N/A	#N/A				up	10594
34789	PRPH	0.104778	0.718603	5.07005	2.36713e-06	0.000149254	3.25227	0.669956	0.774734	0.104778	12	49687715	R	II	PRPH	TSS1500	shore	TSS1500-shore	chr12:49688873-49691360	#N/A	TRUE				up	5630
34967	PRX	0.102111	0.5783	5.77599	1.28192e-07	3.44332e-05	6.10956	0.530891	0.633002	0.102111	19	40919245	F	II	PRX	1stExon	opensea	1stExon-opensea		#N/A	TRUE				up	57716
35033	PSMB7	0.125472	0.564099	6.10747	3.10034e-08	1.92885e-05	7.50724	0.505845	0.631316	0.125472	9	127171934	R	II	PSMB7	Body	opensea	Body-opensea		#N/A	TRUE				up	5695
35097	PSORS1C1	0.100899	0.627568	5.60258	2.66197e-07	4.81111e-05	5.39162	0.580722	0.681621	0.100899	6	31106181	F	II	PSORS1C1	Body	opensea	Body-opensea		#N/A	TRUE				up	170679
35136	PTCD1	0.111083	0.692176	5.81131	1.10346e-07	3.24372e-05	6.25699	0.640602	0.751685	0.111083	7	99017097	R	I	PTCD1	3'UTR	island	3'UTR-island	chr7:99016967-99017289	#N/A	#N/A				up	26024
35214	PTGR1	0.115206	0.490192	5.49206	4.22144e-07	5.97336e-05	4.93917	0.436703	0.551909	0.115206	9	114358399	F	II	PTGR1	Body	shelf	Body-shelf	chr9:114361410-114361760	#N/A	#N/A				up	22949
35715	PYY	0.133049	0.632436	5.53933	3.46749e-07	5.44452e-05	5.13216	0.570663	0.703713	0.133049	17	42079379	R	II	PYY	5'UTR	shelf	5'UTR-shelf	chr17:42082027-42084972	#N/A	#N/A				up	5697
35723	QPCT	0.111021	0.547398	5.68951	1.84748e-07	4.09571e-05	5.75034	0.495852	0.606873	0.111021	2	37571178	R	II	QPCT	TSS1500	shore	TSS1500-shore	chr2:37571676-37572397	#N/A	TRUE				up	25797
35726	QPRT	0.133073	0.565372	5.48607	4.32776e-07	6.04715e-05	4.91478	0.503589	0.636661	0.133073	16	29706275	F	I	QPRT	Body	island	Body-island	chr16:29706198-29706458	#N/A	#N/A				up	23475
35757	RAB11B	0.114161	0.583989	5.31993	8.59044e-07	8.64875e-05	4.24305	0.530986	0.645146	0.114161	19	8454161	R	II	RAB11B	TSS1500	shore	TSS1500-shore	chr19:8454831-8455845	#N/A	#N/A				up	9230
35775	RAB11FIP3	0.107541	0.500827	6.26481	1.56585e-08	1.47716e-05	8.18113	0.450897	0.558438	0.107541	16	528479	F	II	RAB11FIP3	Body	shelf	Body-shelf	chr16:532467-532669	#N/A	#N/A				up	9727
35918	RAB5A	0.127018	0.565736	4.55636	1.76581e-05	0.000507745	1.29794	0.506763	0.633781	0.127018	3	19987528	F	II	RAB5A	TSS1500	shore	TSS1500-shore	chr3:19988333-19989321	#N/A	#N/A		rs1133328		up	5868
35958	RAC3	0.146524	0.660355	5.92293	6.85649e-08	2.57476e-05	6.72526	0.592326	0.73885	0.146524	17	79991871	R	II	RAC3	3'UTR	shore	3'UTR-shore	chr17:79987983-79990315	#N/A	#N/A				up	5881
36015	RAI1	0.139762	0.726898	5.22362	1.27295e-06	0.000106892	3.85828	0.662008	0.80177	0.139762	17	17714414	F	I	RAI1	3'UTR	island	3'UTR-island	chr17:17712911-17714456	TRUE	TRUE				up	10743
36140	RAP1GAP2	0.103165	0.614453	5.36817	7.04631e-07	7.78797e-05	4.43706	0.566555	0.669721	0.103165	17	2831746	R	II	RAP1GAP2	Body	opensea	Body-opensea		#N/A	#N/A				up	23108
36320	RASGEF1A	0.100845	0.544235	5.67212	1.98788e-07	4.23535e-05	5.67838	0.497414	0.598259	0.100845	10	43698931	F	II	RASGEF1A	Body	shore	Body-shore	chr10:43697777-43698177	TRUE	#N/A		rs1254961		up	221002
36479	RBM14	0.117017	0.531593	6.43664	7.38028e-09	1.12333e-05	8.92405	0.477264	0.594281	0.117017	11	66382978	F	II	RBM14	TSS1500	shore	TSS1500-shore	chr11:66383571-66385047	#N/A	#N/A				up	10432
36563	RBMS1	0.107586	0.263348	4.83404	6.03797e-06	0.000258436	2.33977	0.213398	0.320984	0.107586	2	161348665	F	II	RBMS1	Body	shore	Body-shore	chr2:161349223-161350371	TRUE	#N/A				up	5937
36608	RBP4	0.10747	0.559442	4.62518	1.35754e-05	0.00042889	1.55278	0.509545	0.617016	0.10747	10	95353748	R	II	RBP4	Body	opensea	Body-opensea		#N/A	#N/A				up	5950
36732	RDX	0.133807	0.459247	6.30133	1.33519e-08	1.41828e-05	8.33844	0.397122	0.53093	0.133807	11	110163765	R	II	RDX	5'UTR	shelf	5'UTR-shelf	chr11:110166564-110167759	#N/A	#N/A				up	5962
36782	REG4	0.106119	0.507068	5.39576	6.28928e-07	7.31917e-05	4.5484	0.457798	0.563917	0.106119	1	120354772	F	II	REG4	TSS1500	opensea	TSS1500-opensea		#N/A	#N/A				up	83998
36857	REXO1	0.120147	0.428652	5.39128	6.40636e-07	7.39404e-05	4.53033	0.37287	0.493016	0.120147	19	1840461	F	II	REXO1	Body	opensea	Body-opensea		#N/A	#N/A				up	57455
36900	RFTN1	0.14734	0.620335	5.51966	3.76361e-07	5.64926e-05	5.05176	0.551927	0.699267	0.14734	3	16371295	R	II	RFTN1	Body	opensea	Body-opensea		#N/A	TRUE				up	23180
36991	RGMB	0.138072	0.53036	6.01701	4.57979e-08	2.20172e-05	7.12271	0.466256	0.604327	0.138072	5	98129982	R	II	RGMB	3'UTR	opensea	3'UTR-opensea		#N/A	TRUE				up	285704
37009	RGS12	0.114971	0.372653	5.95389	6.00544e-08	2.45503e-05	6.85575	0.319273	0.434244	0.114971	4	3410693	R	II	RGS12	Body	shelf	Body-shelf	chr4:3414681-3415353	#N/A	TRUE				up	6002
37106	RHBDD2	0.103605	0.369414	5.87938	8.25863e-08	2.80835e-05	6.5421	0.321311	0.424917	0.103605	7	75517941	R	I	RHBDD2	3'UTR	opensea	3'UTR-opensea		#N/A	#N/A				up	57414
37201	RHOT1	0.109395	0.49739	5.73188	1.54504e-07	3.75324e-05	5.92603	0.446599	0.555994	0.109395	17	30479187	R	II	RHOT1	Body	opensea	Body-opensea		#N/A	#N/A			rs34649800	up	55288
37297	RIN3	0.128588	0.548718	5.9326	6.57867e-08	2.54031e-05	6.76598	0.489017	0.617605	0.128588	14	93005917	R	II	RIN3	Body	opensea	Body-opensea		#N/A	TRUE				up	79890
37558	RNF39	0.152505	0.289109	4.17674	7.24685e-05	0.00133637	-0.0650747	0.218303	0.370808	0.152505	6	30039206	F	I	RNF39	Body	island	Body-island	chr6:30038881-30039477	#N/A	#N/A		rs2301753		up	80352
37708	RORA	0.101248	0.506974	4.37299	3.52184e-05	0.00080486	0.630269	0.459966	0.561213	0.101248	15	60987894	R	II	RORA	Body	opensea	Body-opensea		#N/A	TRUE				up	6095
37862	RPL5	0.102229	0.677418	6.15914	2.4789e-08	1.75346e-05	7.72784	0.629955	0.732184	0.102229	1	93296860	R	II	RPL5	TSS1500	shore	TSS1500-shore	chr1:93297498-93298122	#N/A	#N/A				up	6125
37922	RPS26	0.100929	0.491718	5.32841	8.297e-07	8.46279e-05	4.27707	0.444858	0.545787	0.100929	12	56434950	R	II	RPS26	TSS1500	shore	TSS1500-shore	chr12:56435573-56436406	#N/A	#N/A				up	6231
38088	RREB1	0.100095	0.601429	5.49645	4.14509e-07	5.9378e-05	4.95707	0.554956	0.655051	0.100095	6	7214480	R	II	RREB1	Body	opensea	Body-opensea		#N/A	TRUE		rs76370983		up	6239
38099	RRM2	0.106168	0.300587	5.46464	4.73024e-07	6.3431e-05	4.82758	0.251295	0.357463	0.106168	2	10266986	R	II	RRM2	Body	shelf	Body-shelf	chr2:10262173-10263481	#N/A	#N/A			rs72544299	up	6241
38180	RTN4	0.111354	0.74476	5.78618	1.2277e-07	3.37166e-05	6.15206	0.693061	0.804414	0.111354	2	55226987	R	II	RTN4	Body	opensea	Body-opensea		#N/A	TRUE				up	57142
38310	RUVBL1	0.115259	0.524806	4.86285	5.39209e-06	0.000241387	2.44986	0.471293	0.586552	0.115259	3	127840983	R	II	RUVBL1	Body	shore	Body-shore	chr3:127842318-127842907	#N/A	#N/A				up	8607
38333	RXRA	0.103147	0.436613	5.62179	2.45601e-07	4.64084e-05	5.47068	0.388723	0.49187	0.103147	9	137228542	F	II	RXRA	Body	shore	Body-shore	chr9:137229726-137229931	#N/A	#N/A		rs76529310		up	6256
38488	SALL1	0.205487	0.523077	4.75044	8.36895e-06	0.000315918	2.02236	0.427672	0.633159	0.205487	16	51171082	R	I	SALL1	Body	shore	Body-shore	chr16:51168266-51169110	#N/A	#N/A				up	6299
38609	SAV1	0.127217	0.394905	6.01392	4.64101e-08	2.21566e-05	7.10963	0.33584	0.463057	0.127217	14	51125203	R	II	SAV1	Body	opensea	Body-opensea		#N/A	TRUE				up	60485
38709	SCARNA4	0.100747	0.485968	5.99348	5.06721e-08	2.31324e-05	7.02307	0.439193	0.53994	0.100747	1	155896909	R	II	SCARNA4	TSS1500	opensea	TSS1500-opensea		#N/A	#N/A				up	677771
38906	SDC2	0.166811	0.622614	6.21477	1.94697e-08	1.61263e-05	7.96613	0.545166	0.711977	0.166811	8	97523090	F	II	SDC2	Body	opensea	Body-opensea		#N/A	TRUE				up	6383
38937	SDCCAG8	0.105589	0.50696	4.36749	3.59465e-05	0.000816299	0.610513	0.457937	0.563525	0.105589	1	243659016	R	II	SDCCAG8	Body	opensea	Body-opensea		#N/A	#N/A				up	10806
39014	SEBOX	0.103438	0.58213	5.05242	2.54052e-06	0.000155546	3.18328	0.534105	0.637543	0.103438	17	26692844	F	II	SEBOX	Body	opensea	Body-opensea		#N/A	#N/A				up	645832
39085	SEC31B	0.120899	0.424084	5.20123	1.39418e-06	0.000112473	3.76935	0.367952	0.488851	0.120899	10	102279791	F	II	SEC31B	TSS200	shore	TSS200-shore	chr10:102279162-102279730	#N/A	TRUE				up	25956
39117	SELE	0.11502	0.475715	5.46088	4.80455e-07	6.37544e-05	4.8123	0.422313	0.537333	0.11502	1	169693534	F	II	SELE	3'UTR	opensea	3'UTR-opensea		#N/A	#N/A				up	6401
39134	SEMA3B	0.12624	0.304317	3.45187	0.000877134	0.00840305	-2.44173	0.245706	0.371946	0.12624	3	50313693	F	I	SEMA3B	Body	island	Body-island	chr3:50312687-50314419	#N/A	#N/A				up	7869
39244	SEPHS1	0.104286	0.320344	4.78761	7.2407e-06	0.00028855	2.16311	0.271926	0.376212	0.104286	10	13388567	F	II	SEPHS1	5'UTR	opensea	5'UTR-opensea		#N/A	#N/A		rs10752299		up	22929
39249	SEPHS2	0.101651	0.512316	5.93205	6.59429e-08	2.54031e-05	6.76365	0.46512	0.566771	0.101651	16	30455027	F	II	SEPHS2	3'UTR	shore	3'UTR-shore	chr16:30456730-30457071	#N/A	#N/A				up	22928
39345	SERPIND1	0.105501	0.524631	5.68534	1.88025e-07	4.13222e-05	5.73306	0.475648	0.581149	0.105501	22	21133553	R	II	SERPIND1	5'UTR	opensea	5'UTR-opensea		#N/A	TRUE				up	3053
39435	SETD2	0.133669	0.671737	5.78486	1.23458e-07	3.37916e-05	6.14657	0.609676	0.743345	0.133669	3	47191823	F	II	SETD2	Body	opensea	Body-opensea		#N/A	TRUE				up	29072
39545	SGCD	0.101166	0.495476	5.97656	5.44905e-08	2.36096e-05	6.95151	0.448506	0.549672	0.101166	5	155794596	F	II	SGCD	Body	opensea	Body-opensea		#N/A	TRUE		rs17053484		up	6444
39557	SGIP1	0.109994	0.574843	4.3293	4.14209e-05	0.000901887	0.473714	0.523775	0.633768	0.109994	1	67204147	R	II	SGIP1	Body	opensea	Body-opensea		#N/A	#N/A				up	84251
39587	SGMS1	0.125711	0.414659	5.00421	3.08031e-06	0.000174194	2.99534	0.356294	0.482004	0.125711	10	52176755	R	II	SGMS1	5'UTR	shore	5'UTR-shore	chr10:52177724-52178182	#N/A	TRUE				up	259230
39602	SGPP2	0.101861	0.32933	4.90084	4.64228e-06	0.0002213	2.59563	0.282037	0.383898	0.101861	2	223419421	R	I	SGPP2	Body	opensea	Body-opensea		#N/A	TRUE				up	130367
39633	SH2D3A	0.109171	0.354179	4.31075	4.43623e-05	0.00094733	0.407545	0.303493	0.412664	0.109171	19	6752895	R	II	SH2D3A	Body	island	Body-island	chr19:6752515-6753657	#N/A	TRUE				up	10045
39716	SH3BP4	0.105188	0.445744	5.77593	1.28223e-07	3.44332e-05	6.10933	0.396907	0.502095	0.105188	2	235961622	R	II	SH3BP4	Body	opensea	Body-opensea		#N/A	#N/A			rs79529990	up	23677
39732	SH3BP5	0.100175	0.476226	5.56897	3.06392e-07	5.13903e-05	5.25358	0.429717	0.529892	0.100175	3	15372726	R	II	SH3BP5	Body	shore	Body-shore	chr3:15373314-15374209	#N/A	#N/A				up	9467
40069	SHPRH	0.100841	0.533375	6.04934	3.98468e-08	2.10692e-05	7.25987	0.486556	0.587397	0.100841	6	146212966	F	II	SHPRH	Body	opensea	Body-opensea		#N/A	TRUE				up	257218
40158	SIK3	0.10141	0.508516	5.73032	1.5552e-07	3.76095e-05	5.91958	0.461433	0.562843	0.10141	11	116948652	F	II	SIK3	Body	opensea	Body-opensea		#N/A	TRUE				up	23387
40248	SKAP1	0.143937	0.537304	6.15007	2.57834e-08	1.77867e-05	7.68905	0.470477	0.614413	0.143937	17	46239623	F	II	SKAP1	Body	opensea	Body-opensea		#N/A	TRUE				up	8631
40270	SKI	0.111844	0.430032	4.4469	2.67117e-05	0.000666065	0.897381	0.378105	0.489949	0.111844	1	2198879	R	I	SKI	Body	opensea	Body-opensea		#N/A	#N/A				up	6497
40321	SLAIN2	0.107631	0.554077	6.79732	1.49382e-09	7.31874e-06	10.5045	0.504105	0.611736	0.107631	4	48377724	F	II	SLAIN2	Body	opensea	Body-opensea		#N/A	TRUE				up	57606
40387	SLC12A7	0.111864	0.526709	6.06679	3.69581e-08	2.04805e-05	7.33405	0.474772	0.586636	0.111864	5	1093738	R	II	SLC12A7	Body	island	Body-island	chr5:1093579-1093837	#N/A	#N/A				up	10723
40490	SLC15A5	0.115505	0.742667	5.77145	1.30681e-07	3.45704e-05	6.09066	0.68904	0.804545	0.115505	12	16430861	R	II	SLC15A5	TSS1500	opensea	TSS1500-opensea		#N/A	#N/A				up	729025
40550	SLC17A2	0.10553	0.541364	5.9409	6.34894e-08	2.50126e-05	6.80098	0.492368	0.597899	0.10553	6	25931205	R	II	SLC17A2	TSS1500	opensea	TSS1500-opensea		#N/A	#N/A			rs72542434	up	10246
40727	SLC22A23	0.104113	0.545176	5.11338	1.98873e-06	0.000135939	3.42231	0.496837	0.600951	0.104113	6	3383656	R	II	SLC22A23	Body	opensea	Body-opensea		#N/A	TRUE			rs77357791	up	63027
40798	SLC25A13	0.103397	0.4097	4.95139	3.80048e-06	0.000196864	2.79054	0.361694	0.465092	0.103397	7	95811907	F	II	SLC25A13	Body	opensea	Body-opensea		#N/A	TRUE				up	10165
40836	SLC25A27	0.102202	0.618905	4.86194	5.41138e-06	0.000241856	2.44639	0.571454	0.673657	0.102202	6	46623767	F	II	SLC25A27	Body	shelf	Body-shelf	chr6:46620541-46621189	#N/A	#N/A				up	9481
40855	SLC25A34	0.118239	0.667222	5.81295	1.09584e-07	3.23561e-05	6.26381	0.612325	0.730564	0.118239	1	16061554	F	II	SLC25A34	TSS1500	shelf	TSS1500-shelf	chr1:16058297-16058505	TRUE	#N/A		rs11577746		up	284723
40923	SLC27A1	0.113073	0.631853	4.60001	1.49491e-05	0.000455897	1.45933	0.579355	0.692427	0.113073	19	17608110	R	II	SLC27A1	Body	island	Body-island	chr19:17607983-17608406	#N/A	#N/A				up	376497
40998	SLC2A4RG	0.11341	0.641022	4.07274	0.000105423	0.00174603	-0.425136	0.588368	0.701777	0.11341	20	62374166	F	II	SLC2A4RG	Body	island	Body-island	chr20:62374061-62374353	#N/A	#N/A				up	56731
41075	SLC35D1	0.100935	0.557209	5.42097	5.66765e-07	6.94739e-05	4.65037	0.510346	0.611281	0.100935	1	67520733	F	II	SLC35D1	TSS1500	shore	TSS1500-shore	chr1:67519224-67520139	#N/A	#N/A				up	23169
41132	SLC38A10	0.112563	0.717824	5.59592	2.7373e-07	4.87936e-05	5.36422	0.665563	0.778126	0.112563	17	79265454	F	II	SLC38A10	Body	shelf	Body-shelf	chr17:79268367-79269467	TRUE	#N/A		rs60955451		up	124565
41225	SLC40A1	0.102566	0.361525	5.56666	3.09362e-07	5.16206e-05	5.24411	0.313905	0.416472	0.102566	2	190442823	R	II	SLC40A1	Body	shelf	Body-shelf	chr2:190445459-190445983	#N/A	#N/A				up	30061
41327	SLC46A3	0.102785	0.341217	5.2718	1.04602e-06	9.54776e-05	4.05033	0.293495	0.39628	0.102785	13	29290660	F	II	SLC46A3	Body	shelf	Body-shelf	chr13:29292670-29293329	#N/A	#N/A				up	283537
41330	SLC47A1	0.101765	0.633166	5.22034	1.29001e-06	0.000107583	3.84527	0.585918	0.687683	0.101765	17	19482275	R	II	SLC47A1	3'UTR	shore	3'UTR-shore	chr17:19483305-19483687	TRUE	#N/A				up	55244
41338	SLC47A2	0.109072	0.74503	6.44859	7.00267e-09	1.11443e-05	8.97595	0.69439	0.803462	0.109072	17	19581939	R	II	SLC47A2	3'UTR	opensea	3'UTR-opensea		#N/A	#N/A				up	146802
41360	SLC4A3	0.117854	0.601821	6.31055	1.28251e-08	1.41367e-05	8.37819	0.547103	0.664958	0.117854	2	220491676	R	II	SLC4A3	TSS1500	shore	TSS1500-shore	chr2:220492105-220492748	#N/A	#N/A				up	6508
41556	SLC7A5	0.138347	0.486879	5.35144	7.54809e-07	8.04507e-05	4.3697	0.422646	0.560993	0.138347	16	87885387	R	II	SLC7A5	Body	opensea	Body-opensea		#N/A	#N/A				up	8140
41639	SLC9A3R2	0.112275	0.389944	5.63456	2.32792e-07	4.55224e-05	5.52328	0.337817	0.450092	0.112275	16	2087932	F	I	SLC9A3R2	Body	shore	Body-shore	chr16:2088753-2088998	#N/A	#N/A				up	9351
41657	SLCO1B3	0.119115	0.779877	5.6492	2.18909e-07	4.39915e-05	5.58367	0.724573	0.843689	0.119115	12	20966524	R	II	SLCO1B3	5'UTR	opensea	5'UTR-opensea		#N/A	#N/A				up	28234
41725	SLFN13	0.150703	0.624149	5.11039	2.01288e-06	0.000136761	3.41053	0.554179	0.704882	0.150703	17	33777219	R	II	SLFN13	TSS1500	shore	TSS1500-shore	chr17:33775294-33775794	#N/A	#N/A				up	146857
42017	SNCAIP	0.10749	0.616614	6.73505	1.97153e-09	7.55404e-06	10.2297	0.566708	0.674198	0.10749	5	121705129	R	II	SNCAIP	5'UTR	opensea	5'UTR-opensea		#N/A	TRUE				up	9627
42181	SNORD56B	0.114181	0.513657	5.80026	1.1565e-07	3.29443e-05	6.21082	0.460644	0.574825	0.114181	14	71863756	F	II	SNORD56B	TSS1500	opensea	TSS1500-opensea		#N/A	#N/A				up	319139
42184	SNORD57	0.129655	0.410457	5.51447	3.84578e-07	5.72882e-05	5.03058	0.35026	0.479915	0.129655	20	2637211	R	I	SNORD57	TSS1500	shelf	TSS1500-shelf	chr20:2632678-2633690	#N/A	#N/A				up	26792
42224	SNRNP40	0.105551	0.720549	5.80351	1.14067e-07	3.28108e-05	6.22437	0.671543	0.777094	0.105551	1	31767860	R	II	SNRNP40	Body	shore	Body-shore	chr1:31769246-31769978	#N/A	#N/A				up	9410
42362	SOD1	0.153829	0.546191	5.65914	2.09948e-07	4.34301e-05	5.62472	0.47477	0.628599	0.153829	21	33034963	F	II	SOD1	Body	shelf	Body-shelf	chr21:33031734-33032657	#N/A	#N/A				up	6647
42461	SORL1	0.106827	0.562483	3.73846	0.000338651	0.00410566	-1.54029	0.512885	0.619712	0.106827	11	121466629	R	II	SORL1	Body	opensea	Body-opensea		TRUE	TRUE				up	6653
42653	SPATA7	0.101064	0.436536	5.59487	2.74935e-07	4.89159e-05	5.35991	0.389613	0.490677	0.101064	14	88855259	R	II	SPATA7	Body	shelf	Body-shelf	chr14:88851883-88852285	#N/A	#N/A				up	55812
42754	SPHK2	0.108011	0.677972	5.54158	3.43503e-07	5.42124e-05	5.14139	0.627825	0.735835	0.108011	19	49133647	R	II	SPHK2	3'UTR	island	3'UTR-island	chr19:49132603-49134291	#N/A	#N/A				up	56848
42766	SPI1	0.124888	0.569124	5.15367	1.69035e-06	0.000124507	3.58109	0.51114	0.636029	0.124888	11	47376519	R	II	SPI1	3'UTR	shore	3'UTR-shore	chr11:47376651-47377236	#N/A	TRUE				up	6688
42860	SPOP	0.117593	0.656133	5.20728	1.36034e-06	0.000110705	3.79337	0.601537	0.71913	0.117593	17	47712139	F	II	SPOP	5'UTR	opensea	5'UTR-opensea		#N/A	TRUE				up	8405
42994	SQSTM1	0.111434	0.630605	5.0987	2.10984e-06	0.000140253	3.36459	0.578868	0.690302	0.111434	5	179238472	R	I	SQSTM1	5'UTR	shelf	5'UTR-shelf	chr5:179232532-179234595	TRUE	#N/A				up	8878
43046	SRD5A3	0.116822	0.377994	4.189	6.93109e-05	0.00129417	-0.0222271	0.323756	0.440578	0.116822	4	56213336	F	II	SRD5A3	Body	shore	Body-shore	chr4:56212294-56213063	#N/A	#N/A		rs7690827		up	79644
43047	SREBF1	0.108708	0.568489	5.69969	1.76991e-07	4.00468e-05	5.79249	0.518018	0.626726	0.108708	17	17721594	R	II	SREBF1	Body	opensea	Body-opensea		TRUE	TRUE				up	6720
43094	SRP19	0.123886	0.564003	6.44027	7.26345e-09	1.12244e-05	8.93982	0.506485	0.63037	0.123886	5	112199323	R	II	SRP19	Body	shelf	Body-shelf	chr5:112196849-112197247	#N/A	#N/A				up	6728
43144	SSBP3	0.106676	0.583149	4.38206	3.40482e-05	0.000786836	0.662898	0.533621	0.640297	0.106676	1	54775837	R	I	SSBP3	Body	opensea	Body-opensea		#N/A	TRUE				up	23648
43231	SSU72	0.102494	0.579229	5.24231	1.17972e-06	0.000102208	3.93267	0.531643	0.634137	0.102494	1	1486459	F	II	SSU72	Body	shelf	Body-shelf	chr1:1489532-1489794	TRUE	#N/A				up	29101
43311	ST6GALNAC6	0.161829	0.532518	5.67851	1.93515e-07	4.20232e-05	5.70479	0.457383	0.619212	0.161829	9	130659142	F	II	ST6GALNAC6	Body	shore	Body-shore	chr9:130661107-130662047	#N/A	#N/A		rs59314952		up	30815
43534	STK19	0.102319	0.54245	4.92778	4.17339e-06	0.000207778	2.69934	0.494945	0.597264	0.102319	6	31938886	F	II	STK19	TSS200	shore	TSS200-shore	chr6:31939730-31940559	#N/A	#N/A				up	8859
43543	STK24	0.108957	0.534992	5.45043	5.01718e-07	6.53341e-05	4.76985	0.484405	0.593362	0.108957	13	99158901	F	II	STK24	Body	opensea	Body-opensea		#N/A	#N/A		rs9513433		up	8428
43616	STK39	0.101416	0.662561	5.44145	5.20729e-07	6.66173e-05	4.73339	0.615475	0.716891	0.101416	2	169023572	R	II	STK39	Body	opensea	Body-opensea		#N/A	TRUE				up	27347
43631	STK40	0.131592	0.486054	5.43713	5.3013e-07	6.7138e-05	4.71586	0.424958	0.55655	0.131592	1	36849024	F	II	STK40	5'UTR	shelf	5'UTR-shelf	chr1:36851089-36851873	#N/A	#N/A				up	83931
43656	STON2	0.116058	0.430758	6.2406	1.74003e-08	1.53796e-05	8.07702	0.376874	0.492932	0.116058	14	81865007	R	II	STON2	TSS200	opensea	TSS200-opensea		#N/A	#N/A				up	85439
43716	STX11	0.104993	0.811697	5.41724	5.75549e-07	7.0051e-05	4.6353	0.76295	0.867943	0.104993	6	144508118	R	I	STX11	Body	island	Body-island	chr6:144507826-144508697	#N/A	#N/A				up	8676
43740	STX2	0.117764	0.585247	4.75286	8.29064e-06	0.00031414	2.0315	0.530571	0.648335	0.117764	12	131310417	R	II	STX2	Body	opensea	Body-opensea		#N/A	#N/A				up	2054
43793	SULT1A1	0.10987	0.510251	4.7846	7.32627e-06	0.000290572	2.15169	0.45924	0.56911	0.10987	16	28622494	R	II	SULT1A1	TSS1500	shelf	TSS1500-shelf	chr16:28624940-28625382	#N/A	#N/A				up	6817
43798	SULT2A1	0.122369	0.597278	5.36603	7.10873e-07	7.82133e-05	4.42842	0.540464	0.662833	0.122369	19	48390114	R	II	SULT2A1	TSS1500	opensea	TSS1500-opensea		#N/A	#N/A				up	6822
43933	SYNE1	0.110907	0.766333	4.63688	1.29791e-05	0.000415959	1.59635	0.71484	0.825748	0.110907	6	152443475	F	II	SYNE1	3'UTR	opensea	3'UTR-opensea		#N/A	#N/A				up	23345
44043	SYNPR	0.120295	0.494898	5.24179	1.18221e-06	0.000102316	3.93061	0.439046	0.559342	0.120295	3	63542363	R	I	SYNPR	Body	opensea	Body-opensea		#N/A	TRUE		rs74467318		up	132204
44301	TAOK1	0.148985	0.765997	6.96808	6.95842e-10	5.7938e-06	11.2614	0.696826	0.84581	0.148985	17	27870753	F	II	TAOK1	3'UTR	opensea	3'UTR-opensea		#N/A	#N/A		rs80278783	rs76598043	up	57551
44304	TAOK3	0.113375	0.624817	6.16113	2.45762e-08	1.75346e-05	7.73635	0.572178	0.685554	0.113375	12	118588556	R	II	TAOK3	3'UTR	opensea	3'UTR-opensea		#N/A	#N/A				up	51347
44363	TAS1R3	0.113212	0.690845	5.78002	1.26018e-07	3.4175e-05	6.12638	0.638282	0.751495	0.113212	1	1269399	R	I	TAS1R3	Body	shore	Body-shore	chr1:1267435-1268986	#N/A	#N/A				up	83756
44383	TATDN1	0.107656	0.45015	5.5753	2.98397e-07	5.07768e-05	5.27953	0.400167	0.507822	0.107656	8	125538941	R	II	TATDN1	Body	opensea	Body-opensea		#N/A	TRUE				up	83940
44395	TBC1D1	0.102599	0.530655	5.50853	3.94194e-07	5.79342e-05	5.00635	0.483019	0.585618	0.102599	4	37897060	R	II	TBC1D1	5'UTR	shelf	5'UTR-shelf	chr4:37891656-37893314	#N/A	#N/A				up	23216
44418	TBC1D14	0.128316	0.642374	5.48052	4.42861e-07	6.12375e-05	4.89219	0.582798	0.711115	0.128316	4	6986609	R	II	TBC1D14	Body	shore	Body-shore	chr4:6988305-6989373	#N/A	#N/A				up	57533
44497	TBC1D8	0.112883	0.65528	7.11496	3.59444e-10	4.4237e-06	11.9164	0.60287	0.715753	0.112883	2	101666894	R	II	TBC1D8	Body	opensea	Body-opensea		#N/A	#N/A				up	11138
44540	TBCD	0.111594	0.347403	5.65345	2.15034e-07	4.37372e-05	5.60121	0.295591	0.407186	0.111594	17	80725109	R	II	TBCD	Body	opensea	Body-opensea		TRUE	#N/A				up	6904
44585	TBPL1	0.102645	0.547268	5.41948	5.70254e-07	6.96578e-05	4.64435	0.499611	0.602256	0.102645	6	134297853	R	II	TBPL1	5'UTR	opensea	5'UTR-opensea		#N/A	TRUE				up	9519
44635	TBX3	0.106521	0.306877	4.40961	3.07192e-05	0.000732264	0.762278	0.257421	0.363942	0.106521	12	115118777	R	II	TBX3	Body	shore	Body-shore	chr12:115120774-115122945	#N/A	#N/A				up	6926
44789	TCFL5	0.116334	0.64276	5.24593	1.16243e-06	0.000101327	3.94711	0.588748	0.705082	0.116334	20	61491699	F	II	TCFL5	Body	shore	Body-shore	chr20:61492119-61493626	#N/A	#N/A				up	10732
44813	TCP10L	0.114467	0.625045	5.54264	3.41994e-07	5.41273e-05	5.14571	0.5719	0.686367	0.114467	21	33957846	F	II	TCP10L	TSS200	opensea	TSS200-opensea		#N/A	#N/A				up	140290
44951	TEPP	0.128138	0.597099	5.50098	4.06768e-07	5.87891e-05	4.97556	0.537606	0.665744	0.128138	16	58019984	F	I	TEPP	Body	island	Body-island	chr16:58019663-58020012	#N/A	#N/A				up	374739
44973	TESC	0.117137	0.425623	4.37776	3.45981e-05	0.000795835	0.647426	0.371238	0.488374	0.117137	12	117482953	R	II	TESC	Body	shore	Body-shore	chr12:117484305-117484627	#N/A	#N/A				up	54997
45094	TFPI	0.120612	0.612749	6.25065	1.66553e-08	1.50807e-05	8.12021	0.556751	0.677363	0.120612	2	188419933	R	II	TFPI	TSS1500	opensea	TSS1500-opensea		#N/A	#N/A				up	7035
45109	TFR2	0.124336	0.335375	5.51335	3.86379e-07	5.73701e-05	5.02599	0.277648	0.401984	0.124336	7	100224470	F	I	TFR2	Body	island	Body-island	chr7:100224270-100224558	#N/A	TRUE				up	7036
45145	TGFB1I1	0.100202	0.415895	5.28153	1.00525e-06	9.37814e-05	4.08923	0.369372	0.469574	0.100202	16	31484618	R	II	TGFB1I1	Body	shore	Body-shore	chr16:31483276-31483646	#N/A	#N/A				up	7041
45234	TH	0.105884	0.548016	4.24282	5.69533e-05	0.00112824	0.166777	0.498855	0.604739	0.105884	11	2193041	R	I	TH	TSS200	opensea	TSS200-opensea		#N/A	#N/A				up	7054
45293	THOP1	0.17841	0.777659	6.10081	3.191e-08	1.9704e-05	7.47882	0.694826	0.873236	0.17841	19	2811736	R	II	THOP1	Body	island	Body-island	chr19:2811638-2811868	TRUE	#N/A				up	7064
45308	THRA	0.124082	0.63699	5.65932	2.09788e-07	4.34288e-05	5.62547	0.57938	0.703463	0.124082	17	38248105	F	II	THRA	Body	shore	Body-shore	chr17:38249260-38249603	#N/A	TRUE				up	7067
45342	THSD4	0.106666	0.650155	5.03133	2.76426e-06	0.000163096	3.10093	0.600632	0.707298	0.106666	15	71586893	F	II	THSD4	Body	opensea	Body-opensea		TRUE	TRUE		rs77098992		up	79875
45386	TIAM2	0.145559	0.459144	5.67263	1.98363e-07	4.23505e-05	5.68048	0.391563	0.537122	0.145559	6	155537930	R	II	TIAM2	Body	shelf	Body-shelf	chr6:155539975-155540193	#N/A	TRUE				up	26230
45493	TJP2	0.108968	0.53951	5.83639	9.91879e-08	3.05348e-05	6.36186	0.488918	0.597886	0.108968	9	71792936	R	II	TJP2	Body	shelf	Body-shelf	chr9:71788715-71789542	#N/A	#N/A				up	9414
45499	TK1	0.129548	0.458972	4.88415	4.95818e-06	0.000229973	2.53153	0.398825	0.528373	0.129548	17	76171657	F	I	TK1	Body	opensea	Body-opensea		#N/A	TRUE		rs1132543		up	7083
45522	TLE2	0.13983	0.680211	7.1103	3.67075e-10	4.4237e-06	11.8956	0.61529	0.75512	0.13983	19	3032739	F	II	TLE2	Body	shelf	Body-shelf	chr19:3035638-3035872	#N/A	#N/A				up	7089
45541	TLK1	0.11143	0.611045	4.91026	4.47281e-06	0.000217134	2.63185	0.55931	0.67074	0.11143	2	172014861	R	II	TLK1	Body	shore	Body-shore	chr2:172016538-172017028	#N/A	#N/A				up	9874
45645	TMBIM6	0.107099	0.722385	5.25879	1.10305e-06	9.82872e-05	3.9984	0.672661	0.77976	0.107099	12	50146292	R	II	TMBIM6	Body	opensea	Body-opensea		#N/A	TRUE			rs11540527	up	7009
45751	TMEM101	0.103911	0.840384	5.94796	6.1598e-08	2.47542e-05	6.83076	0.79214	0.896051	0.103911	17	42089114	F	II	TMEM101	3'UTR	shelf	3'UTR-shelf	chr17:42091712-42091948	#N/A	#N/A				up	84336
45840	TMEM135	0.106376	0.405757	6.23967	1.74709e-08	1.53796e-05	8.07303	0.356368	0.462744	0.106376	11	86748071	F	II	TMEM135	TSS1500	shore	TSS1500-shore	chr11:86748660-86749093	#N/A	#N/A			rs76377279	up	65084
45913	TMEM176B	0.114177	0.547304	4.72279	9.31713e-06	0.000338453	1.9181	0.494293	0.60847	0.114177	7	150495881	R	II	TMEM176B	5'UTR	shore	5'UTR-shore	chr7:150496809-150498206	#N/A	#N/A				up	28959
45919	TMEM177	0.117199	0.568903	4.98477	3.32836e-06	0.000182201	2.91983	0.514489	0.631688	0.117199	2	120435949	R	II	TMEM177	TSS1500	shore	TSS1500-shore	chr2:120436530-120437010	#N/A	#N/A				up	80775
45944	TMEM190	0.178336	0.426523	5.78728	1.22197e-07	3.36699e-05	6.15666	0.343724	0.522061	0.178336	19	55889216	R	I	TMEM190	Body	island	Body-island	chr19:55889005-55889476	#N/A	TRUE				up	147744
45951	TMEM192	0.104442	0.479887	5.56843	3.0708e-07	5.1427e-05	5.25137	0.431396	0.535838	0.104442	4	166000605	R	II	TMEM192	3'UTR	opensea	3'UTR-opensea		#N/A	#N/A				up	201931
45965	TMEM212	0.11051	0.688409	4.14876	8.01999e-05	0.00143592	-0.162532	0.6371	0.74761	0.11051	3	171560011	R	II	TMEM212	TSS1500	opensea	TSS1500-opensea		#N/A	#N/A				up	389177
46099	TMEM82	0.110647	0.518113	5.01096	2.99859e-06	0.000171239	3.02157	0.466742	0.577389	0.110647	1	16069700	F	I	TMEM82	Body	shore	Body-shore	chr1:16070628-16070853	#N/A	#N/A				up	388595
46309	TNFRSF8	0.113769	0.543188	5.806	1.12867e-07	3.26706e-05	6.23477	0.490367	0.604136	0.113769	1	12189847	R	II	TNFRSF8	5'UTR	opensea	5'UTR-opensea		#N/A	#N/A				up	943
46574	TOLLIP	0.14975	0.584147	4.86227	5.40429e-06	0.000241742	2.44766	0.51462	0.66437	0.14975	11	1320010	F	I	TOLLIP	Body	shelf	Body-shelf	chr11:1315467-1317115	TRUE	#N/A				up	54472
46646	TOP3B	0.101289	0.753825	6.08222	3.45779e-08	1.99884e-05	7.39967	0.706798	0.808087	0.101289	22	22334553	F	II	TOP3B	5'UTR	shelf	5'UTR-shelf	chr22:22336948-22337333	#N/A	#N/A		rs78145489		up	8940
46751	TPCN2	0.113589	0.641194	4.4245	2.90538e-05	0.000704949	0.816138	0.588456	0.702045	0.113589	11	68819068	R	II	TPCN2	Body	shelf	Body-shelf	chr11:68816341-68816951	#N/A	TRUE				up	219931
46954	TRAPPC9	0.139289	0.559921	5.22717	1.2547e-06	0.00010601	3.87241	0.495251	0.63454	0.139289	8	140931443	R	I	TRAPPC9	Body	opensea	Body-opensea		#N/A	#N/A				up	83696
47099	TRIM24	0.10266	0.279837	5.6033	2.65401e-07	4.80664e-05	5.39456	0.232173	0.334833	0.10266	7	138147038	F	II	TRIM24	Body	shore	Body-shore	chr7:138144667-138146023	#N/A	#N/A		rs34920255		up	8805
47133	TRIM27	0.108428	0.554622	6.05398	3.90575e-08	2.08759e-05	7.27959	0.504281	0.612709	0.108428	6	28882403	F	II	TRIM27	Body	opensea	Body-opensea		#N/A	#N/A				up	5987
47160	TRIM39	0.102804	0.525305	5.46489	4.72546e-07	6.33896e-05	4.82857	0.477575	0.580379	0.102804	6	30308653	F	II	TRIM39	Body	opensea	Body-opensea		#N/A	#N/A				up	56658
47201	TRIM55	0.109811	0.435026	5.08692	2.21213e-06	0.000143921	3.31837	0.384042	0.493853	0.109811	8	67039041	R	II	TRIM55	TSS1500	opensea	TSS1500-opensea		#N/A	#N/A				up	84675
47260	TRIM72	0.115892	0.520961	4.78943	7.18953e-06	0.000287303	2.17	0.467154	0.583046	0.115892	16	31225957	R	II	TRIM72	5'UTR	island	5'UTR-island	chr16:31225956-31228264	#N/A	#N/A				up	493829
47309	TRIP12	0.106336	0.755825	5.35587	7.41193e-07	7.98871e-05	4.38752	0.706455	0.81279	0.106336	2	230664097	R	II	TRIP12	Body	opensea	Body-opensea		#N/A	#N/A	low-CpG:230371855-230372344			up	9320
47366	TRPC4AP	0.116211	0.463921	5.5964	2.73175e-07	4.87579e-05	5.36621	0.409965	0.526177	0.116211	20	33596700	F	II	TRPC4AP	Body	opensea	Body-opensea		#N/A	#N/A	low-CpG:33060185-33060464			up	26133
47387	TRPM4	0.126467	0.539693	4.30197	4.58235e-05	0.000968703	0.376296	0.480976	0.607443	0.126467	19	49714044	R	II	TRPM4	Body	island	Body-island	chr19:49713495-49714119	#N/A	TRUE				up	54795
47462	TSC2	0.152972	0.580462	7.20926	2.34856e-10	3.70002e-06	12.3387	0.509439	0.662411	0.152972	16	2132527	F	I	TSC2	Body	shore	Body-shore	chr16:2134259-2134632	#N/A	TRUE		rs45517315		up	7249
47500	TSKU	0.148192	0.645433	6.43425	7.45832e-09	1.12743e-05	8.91365	0.57663	0.724822	0.148192	11	76506902	F	II	TSKU	Body	shelf	Body-shelf	chr11:76510286-76510650	#N/A	#N/A				up	25987
47517	TSNARE1	0.120274	0.574283	6.15818	2.48924e-08	1.75346e-05	7.72374	0.518442	0.638716	0.120274	8	143402448	F	II	TSNARE1	Body	shelf	Body-shelf	chr8:143398358-143398777	#N/A	#N/A				up	203062
47524	TSNAX-DISC1	0.105765	0.362242	3.62547	0.000495592	0.00545908	-1.90194	0.313137	0.418902	0.105765	1	231737901	R	II	TSNAX-DISC1	Body	opensea	Body-opensea		#N/A	TRUE		rs6668915		up	100303453
47582	TSPAN5	0.133544	0.60574	4.36276	3.65845e-05	0.000826451	0.59353	0.543738	0.677282	0.133544	4	99402843	F	II	TSPAN5	Body	opensea	Body-opensea		#N/A	TRUE		rs75946967		up	10098
47596	TSPAN9	0.102502	0.577785	5.98447	5.267e-08	2.34234e-05	6.98498	0.530195	0.632697	0.102502	12	3194425	F	II	TSPAN9	5'UTR	opensea	5'UTR-opensea		#N/A	TRUE				up	10867
47649	TTBK1	0.102106	0.370885	3.93379	0.000172469	0.00249179	-0.896661	0.323479	0.425585	0.102106	6	43244304	F	II	TTBK1	Body	island	Body-island	chr6:43243593-43244305	#N/A	#N/A				up	84630
47667	TTC23	0.107693	0.20553	4.97548	3.45374e-06	0.00018615	2.88378	0.15553	0.263223	0.107693	15	99790901	F	II	TTC23	TSS1500	shore	TSS1500-shore	chr15:99791328-99792042	#N/A	#N/A				up	64927
47688	TTC36	0.109878	0.421537	5.70787	1.70988e-07	3.9601e-05	5.82639	0.370522	0.480401	0.109878	11	118397413	F	II	TTC36	TSS1500	shelf	TSS1500-shelf	chr11:118401235-118402069	#N/A	#N/A				up	143941
47748	TTLL10	0.116371	0.543438	5.85746	9.06789e-08	2.92179e-05	6.45011	0.489409	0.60578	0.116371	1	1115920	F	I	TTLL10	Body	island	Body-island	chr1:1115574-1116006	#N/A	#N/A				up	254173
47879	TUBB2A	0.110517	0.71398	6.47624	6.20037e-09	1.09578e-05	9.09622	0.662669	0.773186	0.110517	6	3155143	F	II	TUBB2A	Body	shore	Body-shore	chr6:3156959-3157167	#N/A	#N/A		rs1133247		up	7280
47883	TUBB6	0.111321	0.38626	3.92511	0.000177795	0.00254793	-0.92574	0.334576	0.445897	0.111321	18	12306837	F	II	TUBB6	TSS1500	shore	TSS1500-shore	chr18:12307554-12309043	#N/A	#N/A		rs11080564		up	84617
47980	TYK2	0.145933	0.473797	4.74258	8.62851e-06	0.000322528	1.99268	0.406042	0.551975	0.145933	19	10463879	R	I	TYK2	Body	island	Body-island	chr19:10463626-10464378	#N/A	#N/A				up	7297
48132	UBL3	0.107716	0.506484	6.21654	1.93206e-08	1.61263e-05	7.97372	0.456473	0.564189	0.107716	13	30385117	R	II	UBL3	Body	opensea	Body-opensea		#N/A	TRUE				up	5412
48259	UGT1A10	0.129765	0.618346	3.78841	0.000285539	0.00361831	-1.37789	0.558098	0.687863	0.129765	2	234669166	F	II	UGT1A10	Body	opensea	Body-opensea		#N/A	#N/A		rs56059937		up	54575
48327	UNC119B	0.150084	0.637215	5.65573	2.12983e-07	4.3657e-05	5.61062	0.567533	0.717617	0.150084	12	121159512	R	II	UNC119B	3'UTR	shelf	3'UTR-shelf	chr12:121163472-121163913	#N/A	TRUE				up	84747
48413	UNKL	0.106134	0.531773	5.01738	2.92265e-06	0.000168583	3.04658	0.482496	0.58863	0.106134	16	1413516	F	II	UNKL	3'UTR	shore	3'UTR-shore	chr16:1414417-1414851	#N/A	#N/A				up	64718
48469	USF2	0.141428	0.684653	5.16273	1.62953e-06	0.000121926	3.6169	0.61899	0.760419	0.141428	19	35769802	R	II	USF2	Body	island	Body-island	chr19:35769543-35770197	#N/A	#N/A				up	7392
48504	USP2	0.103983	0.534913	4.94875	3.84058e-06	0.000197996	2.78031	0.486635	0.590618	0.103983	11	119233234	F	II	USP2	Body	shore	Body-shore	chr11:119234480-119235214	#N/A	TRUE				up	9099
48692	VASN	0.108949	0.713485	5.54351	3.40756e-07	5.40206e-05	5.14926	0.662902	0.771851	0.108949	16	4431584	R	I	VASN	Body	opensea	Body-opensea		#N/A	#N/A				up	114990
48740	VCAM1	0.109568	0.64369	5.06545	2.41125e-06	0.000150742	3.23424	0.592819	0.702387	0.109568	1	101188910	F	II	VCAM1	Body	opensea	Body-opensea		#N/A	TRUE				up	7412
48744	VCAN	0.10021	0.386802	3.48164	0.00079633	0.0078081	-2.35057	0.340276	0.440486	0.10021	5	82771274	R	II	VCAN	5'UTR	shore	5'UTR-shore	chr5:82770148-82770599	#N/A	#N/A				up	1462
48824	VHLL	0.115296	0.693287	4.25792	5.38872e-05	0.00108455	0.220077	0.639756	0.755052	0.115296	1	156270253	R	II	VHLL	TSS1500	opensea	TSS1500-opensea		#N/A	#N/A				up	391104
48907	VPS13D	0.119995	0.259177	4.02682	0.000124183	0.00196679	-0.582189	0.203465	0.32346	0.119995	1	12556568	R	II	VPS13D	Body	opensea	Body-opensea		#N/A	#N/A				up	55187
49047	VWA1	0.101883	0.66914	5.28001	1.01152e-06	9.39698e-05	4.08314	0.621837	0.72372	0.101883	1	1377525	R	II	VWA1	3'UTR	shore	3'UTR-shore	chr1:1374461-1375584	#N/A	#N/A				up	64856
49100	WASL	0.105264	0.553316	5.40155	6.14069e-07	7.24548e-05	4.57182	0.504443	0.609707	0.105264	7	123364675	R	II	WASL	Body	opensea	Body-opensea		#N/A	TRUE				up	8976
49117	WDFY3	0.144133	0.616249	6.49606	5.68189e-09	1.06058e-05	9.18255	0.54933	0.693464	0.144133	4	85818877	R	II	WDFY3	5'UTR	opensea	5'UTR-opensea		#N/A	#N/A				up	23001
49466	WNT7B	0.108225	0.160716	3.44029	0.000910624	0.0086384	-2.47705	0.110468	0.218693	0.108225	22	46367617	R	I	WNT7B	Body	island	Body-island	chr22:46366726-46368726	#N/A	#N/A				up	7477
49546	WWC2	0.131446	0.573565	4.48941	2.27601e-05	0.00060053	1.05222	0.512537	0.643983	0.131446	4	184207126	F	II	WWC2	Body	opensea	Body-opensea		#N/A	TRUE				up	80014
49555	WWOX	0.157706	0.427224	4.19506	6.78001e-05	0.00127361	-0.00102484	0.354004	0.511709	0.157706	16	78496508	R	I	WWOX	Body	opensea	Body-opensea		#N/A	#N/A				up	51741
49653	XPOT	0.103115	0.446832	5.91394	7.12539e-08	2.62268e-05	6.68739	0.398958	0.502072	0.103115	12	64801624	F	II	XPOT	5'UTR	shelf	5'UTR-shelf	chr12:64797934-64798944	#N/A	#N/A				up	11260
49815	ZBTB20	0.120579	0.36225	4.98155	3.37128e-06	0.000183334	2.90734	0.306267	0.426846	0.120579	3	114378420	F	II	ZBTB20	5'UTR	opensea	5'UTR-opensea		#N/A	TRUE				up	26137
49947	ZC3H3	0.13607	0.581177	4.51499	2.06609e-05	0.000562931	1.14587	0.518002	0.654072	0.13607	8	144601883	F	II	ZC3H3	Body	island	Body-island	chr8:144601691-144601895	TRUE	#N/A		rs7842979	rs11305588	up	23144
50105	ZFAT	0.101816	0.525336	5.22879	1.24642e-06	0.000105667	3.87888	0.478064	0.57988	0.101816	8	135528418	R	II	ZFAT	Body	opensea	Body-opensea		#N/A	#N/A				up	57623
50134	ZFHX3	0.109088	0.464961	4.14703	8.07024e-05	0.00144189	-0.168536	0.414313	0.523401	0.109088	16	73085092	R	II	ZFHX3	5'UTR	shelf	5'UTR-shelf	chr16:73081590-73082565	#N/A	#N/A				up	463
50234	ZFYVE21	0.114892	0.789263	4.76736	7.83574e-06	0.000303683	2.08634	0.73592	0.850812	0.114892	14	104195301	R	II	ZFYVE21	Body	shore	Body-shore	chr14:104193901-104194627	#N/A	#N/A				up	79038
50260	ZGPAT	0.106574	0.501313	5.97658	5.44846e-08	2.36096e-05	6.95161	0.451832	0.558406	0.106574	20	62364801	R	II	ZGPAT	Body	shore	Body-shore	chr20:62366249-62366535	#N/A	#N/A				up	84619
50694	ZNF490	0.161727	0.561145	5.28639	9.8547e-07	9.27207e-05	4.10867	0.486058	0.647784	0.161727	19	12708001	F	II	ZNF490	Body	island	Body-island	chr19:12707696-12708114	#N/A	#N/A				up	57474
50715	ZNF511	0.106213	0.531823	4.96183	3.64632e-06	0.000191866	2.83089	0.48251	0.588723	0.106213	10	135123067	F	I	ZNF511	Body	island	Body-island	chr10:135122851-135123109	#N/A	#N/A				up	118472
50891	ZNF689	0.135318	0.626472	4.37604	3.48197e-05	0.000799201	0.641263	0.563645	0.698964	0.135318	16	30616011	R	II	ZNF689	Body	island	Body-island	chr16:30615777-30616286	#N/A	#N/A				up	115509
50944	ZNF775	0.103895	0.771296	4.8439	5.8088e-06	0.000252603	2.37742	0.723059	0.826954	0.103895	7	150082688	F	II	ZNF775	5'UTR	opensea	5'UTR-opensea		#N/A	TRUE				up	285971
51051	ZNRF3	0.122326	0.53431	5.91136	7.20425e-08	2.63441e-05	6.67655	0.477516	0.599841	0.122326	22	29281173	R	II	ZNRF3	5'UTR	shore	5'UTR-shore	chr22:29279412-29280287	#N/A	#N/A				up	84133
51065	ZRANB1	0.125943	0.566595	6.43308	7.49681e-09	1.12743e-05	8.90857	0.508121	0.634064	0.125943	10	126630735	R	II	ZRANB1	1stExon	opensea	1stExon-opensea		#N/A	#N/A				up	54764
51106	ZSWIM6	0.143988	0.630442	5.4845	4.35611e-07	6.07032e-05	4.90837	0.56359	0.707578	0.143988	5	60776693	R	II	ZSWIM6	Body	opensea	Body-opensea		#N/A	#N/A				up	57688
51114	ZYG11A	0.123634	0.750271	5.92231	6.87481e-08	2.57559e-05	6.72263	0.692869	0.816503	0.123634	1	53359982	F	II	ZYG11A	3'UTR	opensea	3'UTR-opensea		#N/A	#N/A				up	440590
