# Supplementary material for: Transcriptional and Epigenetic Alterations in the Progression of Non-Alcoholic Fatty Liver Disease and Biomarkers Helping to Diagnose Non-Alcoholic Steatohepatitis
Source: Biomedicines. 2023 Mar 21;11(3):970. doi: 10.3390/biomedicines11030970 (PMC10046227; doi:10.3390/biomedicines11030970)
Supplement: Supplementary file 1 [file biomedicines-11-00970-s001.zip › Supplementary Table S5.xlsx]

## Sheet: Sheet1
	Cluster	ID	Description	GeneRatio	BgRatio	pvalue	p.adjust	qvalue	geneID	Count
1	Normal vs NAFL	GO:0042910	xenobiotic transmembrane transporter activity	3/42	31/18368	4.77905e-05	0.00884124	0.00638884	ABCC6/SLC19A1/SLC29A4	3
2	Normal vs NAFL	GO:0016717	oxidoreductase activity, acting on paired donors, with oxidation of a pair of donors resulting in the reduction of molecular oxygen to two molecules of water	2/42	10/18368	0.000227039	0.0210011	0.0151757	FADS2/SCD	2
3	Normal vs NAFL	GO:0016705	oxidoreductase activity, acting on paired donors, with incorporation or reduction of molecular oxygen	4/42	170/18368	0.000602579	0.037159	0.0268518	FADS2/SCD/CYP7A1/CYP2D6	4
4	NAFL vs NASH	GO:0005201	extracellular matrix structural constituent	27/150	172/18368	3.3718e-27	1.30151e-24	1.14641e-24	COL15A1/CTHRC1/COL1A1/EFEMP1/COL3A1/THBS2/LUM/COL6A3/COL1A2/COL5A2/COL4A1/MGP/LAMB1/HMCN1/COL4A2/SRPX/SPON1/CHI3L1/NPNT/VCAN/IGFBP7/FBLN5/LTBP2/AEBP1/COL12A1/TNC/VWF	27
5	NAFL vs NASH	GO:0030020	extracellular matrix structural constituent conferring tensile strength	9/150	41/18368	3.55624e-11	6.86354e-09	6.04561e-09	COL15A1/COL1A1/COL3A1/COL6A3/COL1A2/COL5A2/COL4A1/COL4A2/COL12A1	9
6	NAFL vs NASH	GO:0048407	platelet-derived growth factor binding	5/150	11/18368	1.50863e-08	1.9411e-06	1.70978e-06	COL1A1/COL3A1/COL1A2/COL4A1/PDGFA	5
7	NAFL vs NASH	GO:0005539	glycosaminoglycan binding	12/150	230/18368	4.20405e-07	4.05691e-05	3.57344e-05	CXCL6/SMOC2/THBS2/LPL/SERPINE2/LXN/VCAN/SULF2/LTBP2/MMP7/PCOLCE2/LYVE1	12
8	NAFL vs NASH	GO:0019838	growth factor binding	9/150	141/18368	2.37633e-06	0.000183453	0.00016159	COL1A1/COL3A1/CD109/COL1A2/COL4A1/ITGAV/IGFBP7/LTBP2/PDGFA	9
9	NAFL vs NASH	GO:0008201	heparin binding	9/150	166/18368	9.0416e-06	0.000581676	0.000512357	CXCL6/SMOC2/THBS2/LPL/SERPINE2/LXN/LTBP2/MMP7/PCOLCE2	9
10	NAFL vs NASH	GO:0005518	collagen binding	6/150	69/18368	2.10534e-05	0.00116094	0.00102259	CTSK/LUM/AEBP1/PDGFA/VWF/PCOLCE2	6
11	NAFL vs NASH	GO:1901681	sulfur compound binding	10/150	265/18368	6.5653e-05	0.00316776	0.00279025	CXCL6/SMOC2/THBS2/LPL/SERPINE2/LXN/LTBP2/MMP7/GNMT/PCOLCE2	10
12	NAFL vs NASH	GO:0005178	integrin binding	7/150	144/18368	0.000181898	0.00780142	0.00687172	COL3A1/ITGAV/LAMB1/NPNT/FBLN5/THY1/VWF	7
13	NAFL vs NASH	GO:0061134	peptidase regulator activity	8/150	230/18368	0.000613212	0.0233104	0.0205325	CD109/COL6A3/SERPINE2/LXN/BIRC3/GPC3/FETUB/PCOLCE2	8
14	NAFL vs NASH	GO:0008009	chemokine activity	4/150	49/18368	0.000680396	0.0233104	0.0205325	CXCL6/CCL20/CCL19/CXCL8	4
15	NAFL vs NASH	GO:0001664	G protein-coupled receptor binding	9/150	295/18368	0.000724676	0.0233104	0.0205325	CXCL6/CTHRC1/NTS/CLIC6/HOMER1/CCL20/CCL19/CXCL8/MARCO	9
16	NAFL vs NASH	GO:0030414	peptidase inhibitor activity	7/150	187/18368	0.000876872	0.0260364	0.0229336	CD109/COL6A3/SERPINE2/LXN/BIRC3/GPC3/FETUB	7
17	Normal vs NASH	GO:0005201	extracellular matrix structural constituent	10/105	172/18368	5.34663e-08	1.81785e-05	1.54208e-05	COL1A1/COL3A1/COL1A2/THBS2/VCAN/AEBP1/LTBP2/NPNT/LUM/EFEMP1	10
18	Normal vs NASH	GO:0003688	DNA replication origin binding	4/105	16/18368	1.74045e-06	0.000295877	0.000250992	MCM10/MCM2/CDC6/MCM5	4
19	Normal vs NASH	GO:0019838	growth factor binding	7/105	141/18368	1.64512e-05	0.00186447	0.00158162	COL1A1/COL3A1/COL1A2/LTBP2/SORT1/IGFBP2/IL1RN	7
20	Normal vs NASH	GO:0030546	signaling receptor activator activity	12/105	495/18368	2.58385e-05	0.00196991	0.00167107	IL32/CXCL9/SPP1/PRKCE/CXCL6/PDGFD/CXCL10/CCL19/EFEMP1/NAMPT/IGF1/IL1RN	12
21	Normal vs NASH	GO:0048407	platelet-derived growth factor binding	3/105	11/18368	2.89693e-05	0.00196991	0.00167107	COL1A1/COL3A1/COL1A2	3
22	Normal vs NASH	GO:0005539	glycosaminoglycan binding	8/105	230/18368	5.25694e-05	0.00259901	0.00220473	LPL/THBS2/VCAN/TREM2/CXCL6/LTBP2/SULF2/CXCL10	8
23	Normal vs NASH	GO:0042379	chemokine receptor binding	5/105	72/18368	5.72539e-05	0.00259901	0.00220473	CXCL9/CXCL6/DEFB1/CXCL10/CCL19	5
24	Normal vs NASH	GO:0005125	cytokine activity	8/105	235/18368	6.11532e-05	0.00259901	0.00220473	IL32/CXCL9/SPP1/CXCL6/CXCL10/CCL19/NAMPT/IL1RN	8
25	Normal vs NASH	GO:0043138	3'-5' DNA helicase activity	3/105	15/18368	7.85653e-05	0.00296802	0.00251777	MCM6/MCM2/MCM5	3
26	Normal vs NASH	GO:0048018	receptor ligand activity	11/105	487/18368	0.000107368	0.0036505	0.00309671	IL32/CXCL9/SPP1/CXCL6/PDGFD/CXCL10/CCL19/EFEMP1/NAMPT/IGF1/IL1RN	11
27	Normal vs NASH	GO:0045236	CXCR chemokine receptor binding	3/105	18/18368	0.000139151	0.00430105	0.00364856	CXCL9/CXCL6/CXCL10	3
28	Normal vs NASH	GO:0008009	chemokine activity	4/105	49/18368	0.000175278	0.00496621	0.00421282	CXCL9/CXCL6/CXCL10/CCL19	4
29	Normal vs NASH	GO:0017116	single-stranded DNA helicase activity	3/105	23/18368	0.000295794	0.00773614	0.00656255	MCM6/MCM2/MCM5	3
30	Normal vs NASH	GO:0016705	oxidoreductase activity, acting on paired donors, with incorporation or reduction of molecular oxygen	6/105	170/18368	0.000434661	0.0105561	0.00895468	FMO1/FADS2/CYP4F22/CYP7A1/CYP2C19/P4HA1	6
31	Normal vs NASH	GO:0003697	single-stranded DNA binding	5/105	123/18368	0.000702482	0.0159229	0.0135074	MCM10/MCM6/MCM2/MCM5/RBMS1	5
32	Normal vs NASH	GO:1901681	sulfur compound binding	7/105	265/18368	0.000822206	0.0174719	0.0148213	LPL/THBS2/CXCL6/LTBP2/CXCL10/ALDH6A1/GNMT	7
33	Normal vs NASH	GO:0005178	integrin binding	5/105	144/18368	0.001423	0.02846	0.0241425	COL3A1/SPP1/THY1/NPNT/IGF1	5
34	Normal vs NASH	GO:0030020	extracellular matrix structural constituent conferring tensile strength	3/105	41/18368	0.00165242	0.0312123	0.0264773	COL1A1/COL3A1/COL1A2	3
35	Normal vs NASH	GO:0016709	oxidoreductase activity, acting on paired donors, with incorporation or reduction of molecular oxygen, NAD(P)H as one donor, and incorporation of one atom of oxygen	3/105	43/18368	0.00189723	0.0322706	0.027375	FMO1/CYP7A1/CYP2C19	3
36	Normal vs NASH	GO:0005319	lipid transporter activity	5/105	154/18368	0.0019121	0.0322706	0.027375	FABP4/APOL3/CFHR4/APOF/ABCB11	5
37	Normal vs NASH	GO:0072341	modified amino acid binding	4/105	93/18368	0.00199318	0.0322706	0.027375	ANXA13/TREM2/FASN/GNMT	4
38	Normal vs NASH	GO:0008201	heparin binding	5/105	166/18368	0.00264954	0.0409474	0.0347356	LPL/THBS2/CXCL6/LTBP2/CXCL10	5
39	Normal vs NASH	GO:0004497	monooxygenase activity	4/105	102/18368	0.00278967	0.0412385	0.0349825	FMO1/CYP4F22/CYP7A1/CYP2C19	4
40	Normal vs NASH	GO:0050661	NADP binding	3/105	53/18368	0.0034557	0.0489558	0.041529	TP53I3/ME1/FMO1	3
