# Supplementary material for: Transcriptional and Epigenetic Alterations in the Progression of Non-Alcoholic Fatty Liver Disease and Biomarkers Helping to Diagnose Non-Alcoholic Steatohepatitis
Source: Biomedicines. 2023 Mar 21;11(3):970. doi: 10.3390/biomedicines11030970 (PMC10046227; doi:10.3390/biomedicines11030970)
Supplement: Supplementary file 1 [file biomedicines-11-00970-s001.zip › Supplementary Table S6.xlsx]

## Sheet: Sheet1
	Cluster	ID	Description	GeneRatio	BgRatio	pvalue	p.adjust	qvalue	geneID	Count
1	Normal vs NAFL	hsa03320	PPAR signaling pathway	4/26	75/8144	8.5073e-05	0.00689091	0.00644764	FADS2/SCD/CYP7A1/PLIN1	4
2	Normal vs NAFL	hsa01212	Fatty acid metabolism	3/26	57/8144	0.000753981	0.0305362	0.0285719	FADS2/FASN/SCD	3
3	NAFL vs NASH	hsa04512	ECM-receptor interaction	11/88	88/8144	2.01046e-09	2.41556e-07	2.24631e-07	COL1A1/THBS2/COL6A3/COL1A2/COL4A1/ITGAV/LAMB1/COL4A2/NPNT/TNC/VWF	11
4	NAFL vs NASH	hsa04510	Focal adhesion	15/88	201/8144	2.96388e-09	2.41556e-07	2.24631e-07	COL1A1/THBS2/COL6A3/COL1A2/COL4A1/ITGAV/LAMB1/COL4A2/PDGFD/CAPN2/HGF/PDGFA/BIRC3/TNC/VWF	15
5	NAFL vs NASH	hsa04974	Protein digestion and absorption	10/88	103/8144	1.33918e-07	7.27621e-06	6.76638e-06	COL15A1/COL1A1/COL3A1/COL6A3/COL1A2/COL5A2/COL4A1/COL4A2/COL12A1/SLC16A10	10
6	NAFL vs NASH	hsa04151	PI3K-Akt signaling pathway	13/88	354/8144	9.88756e-05	0.00354557	0.00329714	COL1A1/THBS2/COL6A3/COL1A2/COL4A1/ITGAV/LAMB1/COL4A2/PDGFD/HGF/PDGFA/TNC/VWF	13
7	NAFL vs NASH	hsa05146	Amoebiasis	7/88	102/8144	0.00010876	0.00354557	0.00329714	COL1A1/COL3A1/COL1A2/COL4A1/LAMB1/COL4A2/CXCL8	7
8	NAFL vs NASH	hsa04933	AGE-RAGE signaling pathway in diabetic complications	6/88	100/8144	0.000709016	0.0192616	0.017912	COL1A1/COL3A1/COL1A2/COL4A1/COL4A2/CXCL8	6
9	Normal vs NASH	hsa03320	PPAR signaling pathway	5/64	75/8144	0.000289094	0.0308658	0.0277878	FABP4/LPL/ME1/FADS2/CYP7A1	5
10	Normal vs NASH	hsa04512	ECM-receptor interaction	5/64	88/8144	0.000606777	0.0308658	0.0277878	COL1A1/COL1A2/SPP1/THBS2/NPNT	5
11	Normal vs NASH	hsa04979	Cholesterol metabolism	4/64	50/8144	0.000609194	0.0308658	0.0277878	LPL/CYP7A1/SORT1/ABCB11	4
