# Supplementary material for: Transcriptional and Epigenetic Alterations in the Progression of Non-Alcoholic Fatty Liver Disease and Biomarkers Helping to Diagnose Non-Alcoholic Steatohepatitis
Source: Biomedicines. 2023 Mar 21;11(3):970. doi: 10.3390/biomedicines11030970 (PMC10046227; doi:10.3390/biomedicines11030970)
Supplement: Supplementary file 1 [file biomedicines-11-00970-s001.zip › Supplementary Table S7.xlsx]

## Sheet: GO
	Cluster	ID	Description	GeneRatio	BgRatio	pvalue	p.adjust	qvalue	geneID	Count
1	NAFL vs NASH	GO:0030695	GTPase regulator activity	53/965	488/18368	4.37132e-07	0.000209386	0.000184056	ABR/ADAP1/AGAP3/AKAP13/ARHGAP27/ARHGEF10/ARHGEF18/ARHGEF4/CPEB2/DAB2IP/EIF5/ERRFI1/FARP1/GMIP/GPSM1/KALRN/PLCE1/RAP1GAP2/RASGEF1A/RGS12/RIN3/SH2D3A/SH3BP4/SH3BP5/TBC1D1/TBC1D14/TBC1D8/TBCD/TIAM2/TSC2/WASL/ARHGAP12/ARHGAP18/ARHGAP21/ARHGEF12/ARHGEF2/ARHGEF3/BCAR3/CDC42SE1/FGD6/MCF2L2/PLEKHG3/PLEKHG6/RAB3IP/RABGAP1L/RALGAPA2/RALGDS/RASAL2/SIPA1/SPATA13/SRGAP1/STARD13/TIAM1	53
2	NAFL vs NASH	GO:0060589	nucleoside-triphosphatase regulator activity	53/965	488/18368	4.37132e-07	0.000209386	0.000184056	ABR/ADAP1/AGAP3/AKAP13/ARHGAP27/ARHGEF10/ARHGEF18/ARHGEF4/CPEB2/DAB2IP/EIF5/ERRFI1/FARP1/GMIP/GPSM1/KALRN/PLCE1/RAP1GAP2/RASGEF1A/RGS12/RIN3/SH2D3A/SH3BP4/SH3BP5/TBC1D1/TBC1D14/TBC1D8/TBCD/TIAM2/TSC2/WASL/ARHGAP12/ARHGAP18/ARHGAP21/ARHGEF12/ARHGEF2/ARHGEF3/BCAR3/CDC42SE1/FGD6/MCF2L2/PLEKHG3/PLEKHG6/RAB3IP/RABGAP1L/RALGAPA2/RALGDS/RASAL2/SIPA1/SPATA13/SRGAP1/STARD13/TIAM1	53
3	NAFL vs NASH	GO:0005096	GTPase activator activity	47/965	462/18368	1.14446e-05	0.00321384	0.00282505	ABR/ADAP1/AGAP3/AKAP13/ARHGAP27/ARHGEF10/ARHGEF18/ARHGEF4/DAB2IP/ERRFI1/FARP1/GMIP/KALRN/PLCE1/RAP1GAP2/RASGEF1A/RGS12/RIN3/SH2D3A/SH3BP5/TBC1D1/TBC1D14/TBC1D8/TBCD/TIAM2/TSC2/ARHGAP12/ARHGAP18/ARHGAP21/ARHGEF12/ARHGEF2/ARHGEF3/BCAR3/FGD6/MCF2L2/PLEKHG3/PLEKHG6/RAB3IP/RABGAP1L/RALGAPA2/RALGDS/RASAL2/SIPA1/SPATA13/SRGAP1/STARD13/TIAM1	47
4	NAFL vs NASH	GO:0045296	cadherin binding	37/965	332/18368	1.3419e-05	0.00321384	0.00282505	ABCF3/BAIAP2/BAIAP2L1/CAPZB/CDH23/CHMP4B/CRKL/DAB2IP/DLG1/EFHD2/EGFR/EIF5/KTN1/MYH9/PFKP/PI4KA/PRDX1/RAB11B/RDX/RPS26/RTN4/RUVBL1/SLC9A3R2/STK24/TJP2/VASN/AHNAK/ANXA2/ARHGAP18/CLIC1/EHD4/EZR/FMNL2/LIMA1/SPTBN1/STXBP6/TAGLN2	37
5	NAFL vs NASH	GO:0016405	CoA-ligase activity	8/965	27/18368	5.1142e-05	0.00979881	0.0086134	ACSF2/ACSL1/ACSL3/ACSL5/ACSS2/DIP2A/SLC27A1/ACSS1	8
6	NAFL vs NASH	GO:0016878	acid-thiol ligase activity	8/965	31/18368	0.000150681	0.0240587	0.0211481	ACSF2/ACSL1/ACSL3/ACSL5/ACSS2/DIP2A/SLC27A1/ACSS1	8
7	NAFL vs NASH	GO:0030674	protein-macromolecule adaptor activity	31/965	296/18368	0.000205182	0.0280807	0.0246836	AKAP13/AP1S1/AP2B1/BAIAP2/BTRC/CRKL/CUX1/DAB2IP/FRMD4A/GRB10/HIP1/IRS1/KLHDC10/MYH9/PPP4R2/SAV1/SLC9A3R2/STON2/STX11/STX2/SYNE1/TJP2/TRPC4AP/TSNARE1/AKAP6/DUSP19/NAPG/NCK2/RPTOR/SH2B3/SORBS1	31
8	NAFL vs NASH	GO:0060090	molecular adaptor activity	36/965	369/18368	0.000269433	0.0300755	0.0264371	AKAP13/AKAP9/AP1S1/AP2B1/BAIAP2/BTRC/CRKL/CUX1/DAB2IP/DLG1/FRMD4A/GRB10/HIP1/IRS1/KLHDC10/MYH9/PPP4R2/SAV1/SLC9A3R2/STON2/STX11/STX2/SYNE1/TJP2/TRPC4AP/TSNARE1/WWC2/AKAP6/DUSP19/NAPG/NCK2/RPTOR/SASH1/SH2B3/SMARCD1/SORBS1	36
9	NAFL vs NASH	GO:0005085	guanyl-nucleotide exchange factor activity	25/965	223/18368	0.000294657	0.0300755	0.0264371	ABR/AKAP13/ARHGEF10/ARHGEF18/ARHGEF4/FARP1/KALRN/PLCE1/RASGEF1A/RIN3/SH2D3A/SH3BP5/TIAM2/ARHGEF12/ARHGEF2/ARHGEF3/BCAR3/FGD6/MCF2L2/PLEKHG3/PLEKHG6/RAB3IP/RALGDS/SPATA13/TIAM1	25
10	NAFL vs NASH	GO:0033218	amide binding	38/965	400/18368	0.000313941	0.0300755	0.0264371	ACACB/ANG/AP2B1/CD14/CD36/CLN8/EPHA4/FZD5/GUCY2C/HLA-DPB1/HLA-DRB1/ITGAM/KCNIP2/KDELR2/LDLR/MCCC1/MTHFS/NFATC1/NPR2/PCCA/PPIH/RXRA/SLC40A1/SLC7A5/SORL1/THOP1/ACOT11/CD74/ECE1/HLA-B/HSPG2/ITGA2/LDLRAD3/PC/PEX5/SCP2/TAP1/TGFB2	38
11	NAFL vs NASH	GO:0140297	DNA-binding transcription factor binding	37/965	394/18368	0.000466889	0.0385416	0.033879	ARID1A/CREBBP/CTBP1/DLL1/FBP1/GTF2B/HDAC4/MED24/NFATC1/NFYB/PRDM16/RXRA/SKI/SPI1/TBX3/TCP10L/TGFB1I1/TRIM24/TRIP12/USF2/BCL2/CTBP2/DHX9/ESR1/FOXP1/FUS/GATA6/HDAC7/HDAC9/HMGA1/LDB1/MYC/SRI/TACC1/TACC2/TDG/TRIP4	37
12	NAFL vs NASH	GO:0031267	small GTPase binding	27/965	259/18368	0.00055152	0.0385416	0.033879	ABCA1/AKAP13/DAAM2/ERRFI1/EXPH5/FARP1/MYO1C/NPC1L1/PLCE1/RAB11FIP3/RIN3/SH3BP4/SOD1/SORL1/SPHK2/STK19/TSC2/XPOT/ANXA2/ARHGEF2/CDC42SE1/FGD6/FMNL2/KIF3B/PEX5/RABGAP1L/UNC13D	27
13	NAFL vs NASH	GO:0005178	integrin binding	18/965	144/18368	0.000555674	0.0385416	0.033879	EGFR/IGF1/ITGA3/ITGAM/ITGB4/ITGB7/LGALS12/LTBP4/MYH9/PRKCA/VCAM1/CASR/DST/ITGA2/ITGAX/LYN/PTK2/UTRN	18
14	NAFL vs NASH	GO:0016247	channel regulator activity	18/965	145/18368	0.000603996	0.0385416	0.033879	AKAP9/CACNB3/DLG1/DPP6/FGF12/FXYD6/GRM3/KCNAB2/KCNE1/KCNIP2/KCNS1/LYNX1/ATP2B4/BCL2/GEM/KCNIP1/NEDD4/SRI	18
15	NAFL vs NASH	GO:0044325	transmembrane transporter binding	17/965	133/18368	0.000605203	0.0385416	0.033879	AKAP9/CHERP/DLG1/FGF12/FYN/KCNAB2/KCNC1/KCNE1/KCNIP2/KCNQ1/PACS2/AKAP6/CASR/LYN/PACS1/PDE4B/SRI	17
16	NAFL vs NASH	GO:0019902	phosphatase binding	22/965	196/18368	0.000652037	0.0385416	0.033879	AP3B1/DAB2IP/DLG1/EGFR/EIF4EBP1/KCNN4/KCNQ1/PPP1R16A/PPP1R3C/SKAP1/SLC9A3R2/SOD1/TRPC4AP/TSC2/ATP2B4/BCL2/FOXO1/LGALS3/MYO16/PARD3/PTK2/RCAN3	22
17	NAFL vs NASH	GO:0097110	scaffold protein binding	11/965	67/18368	0.000683932	0.0385416	0.033879	BAIAP2/CACNA1H/DLL1/FYN/GRM3/KCNQ1/ATP2B4/CASP8/LYN/NCK2/VIM	11
18	NAFL vs NASH	GO:0004467	long-chain fatty acid-CoA ligase activity	5/965	15/18368	0.000764378	0.0406819	0.0357604	ACSF2/ACSL1/ACSL3/ACSL5/SLC27A1	5
19	NAFL vs NASH	GO:0099106	ion channel regulator activity	17/965	139/18368	0.00100208	0.0482637	0.042425	AKAP9/CACNB3/DLG1/DPP6/FGF12/FXYD6/GRM3/KCNAB2/KCNE1/KCNIP2/KCNS1/LYNX1/ATP2B4/GEM/KCNIP1/NEDD4/SRI	17
20	NAFL vs NASH	GO:0031625	ubiquitin protein ligase binding	29/965	297/18368	0.00100759	0.0482637	0.042425	AXIN2/BRCA1/EGFR/FZD5/NLK/PER3/RPL5/RTN4/SHPRH/SKI/SNCAIP/SPOP/SQSTM1/TMBIM6/TOLLIP/USP2/APC/BCL2/CASP8/CUL1/CUL9/FOXO1/HSPA1B/LYN/PML/SLC22A18/TRAF1/TRIB2/TUBB	29
21	NAFL vs NASH	GO:0016208	AMP binding	5/965	16/18368	0.00106402	0.0485396	0.0426675	ACSS2/FBP1/PFKP/ACSS1/PRKAG2	5
22	NAFL vs NASH	GO:0016877	ligase activity, forming carbon-sulfur bonds	8/965	41/18368	0.00114521	0.0498688	0.0438359	ACSF2/ACSL1/ACSL3/ACSL5/ACSS2/DIP2A/SLC27A1/ACSS1	8
23	Normal vs NASH	GO:0030695	GTPase regulator activity	25/283	488/18368	1.6526e-07	4.94126e-05	4.5142e-05	ABR/AKAP13/ARHGAP27/ARHGEF10/ARHGEF4/FARP1/FGD6/GMIP/KALRN/RGS12/SH3BP4/TBC1D14/TBC1D8/TIAM2/TSC2/WASL/ARHGEF12/ARHGEF2/MCF2L2/RAB3IP/RASAL2/SIPA1/SPATA13/STARD13/TIAM1	25
24	Normal vs NASH	GO:0060589	nucleoside-triphosphatase regulator activity	25/283	488/18368	1.6526e-07	4.94126e-05	4.5142e-05	ABR/AKAP13/ARHGAP27/ARHGEF10/ARHGEF4/FARP1/FGD6/GMIP/KALRN/RGS12/SH3BP4/TBC1D14/TBC1D8/TIAM2/TSC2/WASL/ARHGEF12/ARHGEF2/MCF2L2/RAB3IP/RASAL2/SIPA1/SPATA13/STARD13/TIAM1	25
25	Normal vs NASH	GO:0005096	GTPase activator activity	23/283	462/18368	8.63578e-07	0.00017214	0.000157262	ABR/AKAP13/ARHGAP27/ARHGEF10/ARHGEF4/FARP1/FGD6/GMIP/KALRN/RGS12/TBC1D14/TBC1D8/TIAM2/TSC2/ARHGEF12/ARHGEF2/MCF2L2/RAB3IP/RASAL2/SIPA1/SPATA13/STARD13/TIAM1	23
26	Normal vs NASH	GO:0005085	guanyl-nucleotide exchange factor activity	14/283	223/18368	9.90007e-06	0.00148006	0.00135214	ABR/AKAP13/ARHGEF10/ARHGEF4/FARP1/FGD6/KALRN/TIAM2/ARHGEF12/ARHGEF2/MCF2L2/RAB3IP/SPATA13/TIAM1	14
27	Normal vs NASH	GO:0008395	steroid hydroxylase activity	6/283	38/18368	2.31384e-05	0.00276736	0.00252818	CYP1A1/CYP1A2/CYP1B1/CYP2C19/CYP2C8/CYP2D6	6
28	Normal vs NASH	GO:0016712	oxidoreductase activity, acting on paired donors, with incorporation or reduction of molecular oxygen, reduced flavin or flavoprotein as one donor, and incorporation of one atom of oxygen	6/283	40/18368	3.13508e-05	0.00295419	0.00269887	CYP1A1/CYP1A2/CYP1B1/CYP2C19/CYP2C8/CYP2D6	6
29	Normal vs NASH	GO:0070330	aromatase activity	5/283	25/18368	3.45808e-05	0.00295419	0.00269887	CYP1A1/CYP1A2/CYP1B1/CYP2C19/CYP2C8	5
30	Normal vs NASH	GO:0004497	monooxygenase activity	8/283	102/18368	0.000180451	0.0134887	0.0123229	AKR1D1/CYP1A1/CYP1A2/CYP1B1/CYP2C19/CYP2C8/CYP2D6/FMO5	8
31	Normal vs NASH	GO:0017025	TBP-class protein binding	4/283	23/18368	0.000387714	0.0257614	0.0235349	AHR/BRF1/RUVBL1/THRA	4
32	Normal vs NASH	GO:0016709	oxidoreductase activity, acting on paired donors, with incorporation or reduction of molecular oxygen, NAD(P)H as one donor, and incorporation of one atom of oxygen	5/283	43/18368	0.000499619	0.0298772	0.027295	AKR1D1/CYP1A1/CYP2C19/CYP2D6/FMO5	5

## Sheet: KEGG
	Cluster	ID	Description	GeneRatio	BgRatio	pvalue	p.adjust	qvalue	geneID	Count
1	NAFL vs NASH	hsa04810	Regulation of actin cytoskeleton	32/504	218/8144	3.79103e-06	0.0012245	0.000989658	ARHGEF4/BAIAP2/BDKRB2/CFL2/CRKL/EGFR/FGFR3/ITGA3/ITGAM/ITGB4/ITGB7/MYH9/MYLK4/RAC3/RDX/WASL/APC/ARHGEF12/CDC42/EZR/FGFR2/GNG12/ITGA2/ITGAX/LIMK1/PDGFA/PDGFRA/PIP4K2A/PIP5K1A/PTK2/SPATA13/TIAM1	32
2	NAFL vs NASH	hsa04530	Tight junction	25/504	169/8144	3.84445e-05	0.0044358	0.00358507	ARHGEF18/CLDN14/CLDN15/CLDN18/DLG1/DLG2/MYH9/PRKAB1/PRKAB2/RDX/TJP2/AMOTL2/ARHGEF2/CDC42/CLDN9/EZR/NEDD4/PARD3/PPP2CA/PRKAG2/PRKCE/RAB8B/RUNX1/SYNPO/TIAM1	25
3	NAFL vs NASH	hsa04152	AMPK signaling pathway	20/504	120/8144	4.11994e-05	0.0044358	0.00358507	ACACB/CD36/CREB5/EIF4EBP1/FBP1/IGF1/IRS1/MTOR/PFKP/PRKAB1/PRKAB2/RAB11B/SREBF1/TBC1D1/TSC2/CAB39L/FOXO1/PPP2CA/PRKAG2/RPTOR	20
4	NAFL vs NASH	hsa04310	Wnt signaling pathway	24/504	167/8144	8.7712e-05	0.00708274	0.00572436	AXIN2/BTRC/CREBBP/CTBP1/DAAM2/FRAT1/FZD5/LRP5/NFATC1/NLK/PRKCA/RAC3/RUVBL1/TLE2/WNT7B/ZNRF3/APC/CTBP2/CUL1/MMP7/MYC/NFATC4/TBL1XR1/TLE3	24
5	NAFL vs NASH	hsa04213	Longevity regulating pathway - multiple species	12/504	62/8144	0.000347504	0.0224487	0.0181433	ADCY1/ATG5/IGF1/IRS1/MTOR/PRKAB1/PRKAB2/SOD1/FOXO1/HSPA1B/PRKAG2/RPTOR	12
6	NAFL vs NASH	hsa00620	Pyruvate metabolism	10/504	47/8144	0.000487632	0.0262508	0.0212163	ACACB/ACSS2/ALDH2/ALDH7A1/HAGH/LDHD/ACSS1/LDHB/ME3/PC	10
7	NAFL vs NASH	hsa04920	Adipocytokine signaling pathway	12/504	69/8144	0.000955147	0.0382345	0.0309016	ACACB/ACSL1/ACSL3/ACSL5/CD36/IRS1/MTOR/PRKAB1/PRKAB2/RXRA/NFKBIE/PRKAG2	12
8	NAFL vs NASH	hsa05204	Chemical carcinogenesis - DNA adducts	12/504	69/8144	0.000955147	0.0382345	0.0309016	AKR1C2/CYP1A1/CYP1A2/CYP1B1/CYP2C19/CYP2C8/CYP2E1/NAT2/SULT1A1/SULT2A1/UGT1A10/NAT1	12
9	NAFL vs NASH	hsa05130	Pathogenic Escherichia coli infection	24/504	197/8144	0.00106536	0.0382345	0.0309016	BAIAP2/BAIAP2L1/CLDN14/CLDN15/CLDN18/FYN/MYH9/MYO1C/TMBIM6/TUBB2A/TUBB6/WASL/ARF6/ARHGEF12/ARHGEF2/CASP1/CASP8/CDC42/CLDN9/EZR/IL18/MYO1E/NCK2/TUBB	24
10	NAFL vs NASH	hsa04146	Peroxisome	13/504	82/8144	0.00145336	0.0469436	0.0379404	ACSL1/ACSL3/ACSL5/AMACR/HAO2/MVK/PEX10/PEX14/PRDX1/SOD1/PEX5/PEX6/SCP2	13
11	Normal vs NASH	hsa05204	Chemical carcinogenesis - DNA adducts	8/157	69/8144	4.92256e-05	0.00698007	0.00638429	CYP1A1/CYP1A2/CYP1B1/CYP2C19/CYP2C8/NAT2/SULT2A1/NAT1	8
12	Normal vs NASH	hsa04810	Regulation of actin cytoskeleton	14/157	218/8144	7.56069e-05	0.00698007	0.00638429	ARHGEF4/BAIAP2/CFL2/FGFR3/MYH9/RAC3/RDX/WASL/ARHGEF12/PDGFA/PIP4K2A/PTK2/SPATA13/TIAM1	14
13	Normal vs NASH	hsa04530	Tight junction	12/157	169/8144	9.68652e-05	0.00698007	0.00638429	CLDN14/CLDN18/DLG2/MPP4/MYH9/PRKAB1/RDX/ARHGEF2/PRKCE/RAB8B/SYNPO/TIAM1	12
14	Normal vs NASH	hsa05130	Pathogenic Escherichia coli infection	13/157	197/8144	0.00010457	0.00698007	0.00638429	BAIAP2/CLDN14/CLDN18/FYN/MYH9/PTPN6/WASL/ARHGEF12/ARHGEF2/CASP1/CASP8/MYO1E/TUBB	13
15	Normal vs NASH	hsa05152	Tuberculosis	11/157	180/8144	0.000690263	0.03686	0.0337139	CD14/CREBBP/HLA-DOA/HLA-DPB1/LAMP1/NOD2/SPHK2/ARHGEF12/CASP8/CD74/TGFB2	11
