# Supplementary material for: Transcriptional and Epigenetic Alterations in the Progression of Non-Alcoholic Fatty Liver Disease and Biomarkers Helping to Diagnose Non-Alcoholic Steatohepatitis
Source: Biomedicines. 2023 Mar 21;11(3):970. doi: 10.3390/biomedicines11030970 (PMC10046227; doi:10.3390/biomedicines11030970)
Supplement: Supplementary file 1 [file biomedicines-11-00970-s001.zip › Supplementary Table S8.xlsx]

## Sheet: Sheet1
Supplementary Table 8: The hyperparameters of six models
	hyperparameter
LASSO	l_1se=0.1678
LASSO	l_1se=0.1678
LR	/
LR	/
RF	ntree=600, mtry=1
RF	ntree=600, mtry=1
SVM	Cost=5, gamma=0.001
XGBoost	max_depth=3, eta=0.2, nround=26
XGBoost	max_depth=3, eta=0.2, nround=26
KNN	K=11
KNN	K=11
LASSO: Least absolute shrinkage and selection operator; LR: Logistic regression; RF: Random forest; SVM: Support vector machine; XGBoost: Extreme gradient boosting; KNN: K-nearest neighbor.
