# Supplementary material for: Transcriptional and Epigenetic Alterations in the Progression of Non-Alcoholic Fatty Liver Disease and Biomarkers Helping to Diagnose Non-Alcoholic Steatohepatitis
Source: Biomedicines. 2023 Mar 21;11(3):970. doi: 10.3390/biomedicines11030970 (PMC10046227; doi:10.3390/biomedicines11030970)
Supplement: Supplementary file 1 [file biomedicines-11-00970-s001.zip › Supplementary Table S9.xlsx]

## Sheet: Sheet1
sample	group	Apof_MEAN	Apof_SEM	Bicc1_MEAN	Bicc1_SD	Thop1_MEAN	Thop1_SD
1	NASH	0.8309	0.10369	0.41395	0.11555	0.27003	0.06068
2	NASH	1.30535	0.1866	0.31986	0.06448	0.27285	0.0687
3	NASH	1.27109	0.18311	0.96215	0.15453	0.67861	0.15785
4	NASH	0.78698	0.12309	1.03479	0.154	0.47274	0.11002
5	NASH	0.74524	0.13096	1	0.15531	0.70032	0.0863
1	NAFL	0.00472	0.00084	4.43134	0.93452	5.89135	1.09552
2	NAFL	0.0424	0.00845	8.45337	3.44345	3.81186	0.99771
3	NAFL	0.00723	0.00092	2.81564	0.37424	4.6058	0.86836
4	NAFL	0.00938	0.00192	8.68336	1.76152	3.47245	1.01614
5	NAFL	0.01097	0.00243	6.66067	1.5518	1.4233	0.5764
